1 **Combined nanometric and phylogenetic analysis of *Giardia lamblia*'s unique endocytic**  
2 **compartments sheds light on the evolution of endocytosis in Fornicata**

3  
4 Rui Santos<sup>1,8</sup>, Ásgeir Ástvaldsson<sup>2</sup>, Shweta V. Pipaliya<sup>3</sup>, Jon Paulin Zumthor<sup>5</sup>, Joel B. Dacks<sup>3,4</sup>,  
5 Staffan Svärd<sup>2</sup>, Adrian B. Hehl<sup>1\*</sup>, Carmen Faso<sup>6,7†</sup>

6  
7 <sup>1</sup>Institute of Parasitology, University of Zürich, Winterthurerstrasse 266a 8057 Zürich

8 <sup>2</sup>Department of Cell and Molecular Biology, University of Uppsala, Husargatan 3, 752 37  
9 Uppsala

10 <sup>3</sup>Division of Infectious Diseases, Department of Medicine, University of Alberta, Edmonton,  
11 Alberta, Canada

12 <sup>4</sup>Institute of Parasitology, Biology Centre, CAS, v.v.i. Branisovska 31, 370 05 Ceske Budejovice,  
13 Czech Republic

14 <sup>5</sup>Amt für Lebensmittelsicherheit und Tiergesundheit Graubünden, Chur

15 <sup>6</sup>Institute of Cell Biology, University of Bern, Bern, Switzerland

16 <sup>7</sup>Multidisciplinary Center for Infectious Diseases, University of Bern, Bern, Switzerland

17 <sup>8</sup>Institute of Anatomy, University of Zürich, Winterthurerstrasse 190 8057 Zürich

18

19 \*These authors contributed equally to this work.

20

21 †Author for correspondence: Carmen Faso ([carmen.faso@unibe.ch](mailto:carmen.faso@unibe.ch))

22

23 Authors' email addresses:

24 RS: [rui.santos@anatomy.uzh.ch](mailto:rui.santos@anatomy.uzh.ch)

25 AA: [asgeir.astvaldsson@gmail.com](mailto:asgeir.astvaldsson@gmail.com)

26 SVP: [shweta.pipaliya@epfl.ch](mailto:shweta.pipaliya@epfl.ch)

27 JPZ: [JonPaulin.Zumthor@alt.gr.ch](mailto:JonPaulin.Zumthor@alt.gr.ch)

28 JBD: [dacks@ualberta.ca](mailto:dacks@ualberta.ca)

29 SS: [staffan.svard@icm.uu.se](mailto:staffan.svard@icm.uu.se)

30 ABH: [Adrian.hehl@uzh.ch](mailto:Adrian.hehl@uzh.ch)

31

32 RS ORCID iD: 0000-0001-6003-9079

33 CF ORCID iD: 0000-0002-1831-9365

34 ABH ORCID iD: 0000-0002-2110-4445

35 SVP ORCID iD: 0000-0003-0630-4120

36 JBD ORCID iD: 0000-0003-4520-5694

37 SS ORCID iD: 0000-0002-7392-1746

38 **Keywords:** endocytosis, Super Resolution Microscopy (SRM), volumetric Electron Microscopy,  
39 Peripheral Endocytic Compartments (PECs), convergent evolution, metamonada, *Giardia*,  
40 *Tritrichomonas*, *Spiroucleus*, peripheral vacuoles

41

## 42 **ABSTRACT**

43 *Giardia lamblia*, a parasitic protist of the metamonada supergroup, has evolved one of  
44 the most diverged endocytic compartment systems investigated so far. Peripheral endocytic  
45 compartments, currently known as peripheral vesicles or vacuoles (PVs), perform bulk uptake of  
46 fluid phase material which is then digested and sorted either to the cell cytosol or back to the  
47 extracellular space. Here, we present a quantitative morphological characterization of these  
48 organelles using volumetric electron microscopy and super-resolution microscopy (SRM). We  
49 defined a morphological classification for the heterogenous population of PVs and performed a  
50 comparative analysis of PVs and endosome-like organelles in representatives of  
51 phylogenetically-related taxa, *Spiroucleus spp.* and *Tritrichomonas foetus*. To investigate the  
52 as-yet insufficiently understood connection between PVs and clathrin assemblies in *G. lamblia*,  
53 we further performed an in-depth search for two key elements of the endocytic machinery,  
54 clathrin heavy chain (CHC) and clathrin light chain (CLC) across different lineages in  
55 Metamonada. Our data point to the loss of a *bona fide* CLC in the last Fornicata common  
56 ancestor (LFCA) with the emergence of a protein analogous to CLC (*GIACL*) in the *Giardia*  
57 genus. Taken together, this provides the first comprehensive nanometric view of *Giardia*'s  
58 endocytic system architecture and sheds light on the evolution of *GIACL* analogues in the  
59 Fornicata supergroup and, specific to *Giardia*, as a possible adaptation to the formation and  
60 maintenance of stable clathrin assemblies at PVs.

61

## 62 **INTRODUCTION**

63 Endomembrane compartments, while present in a few prokaryotic lineages (Heimerl et  
64 al. 2017), have evolved and greatly diversified across eukaryotic lineages. A fundamental task  
65 performed by some membrane-bounded organelles is endocytosis – the controlled and directed  
66 uptake of nutrients and other materials from the extracellular space into the cell by membrane  
67 transport. Fluid phase or receptor-bound material at the cell surface is internalised via  
68 invaginations and formation of vesicles at the plasma membrane, mediated by clathrin-coated  
69 vesicles (CCVs) (Robinson 2015; Kaksonen and Roux 2018). In turn, CCVs fuse with early  
70 endosomes which mature into late endosomes upon lysosome fusion (Huotari and Helenius  
71 2011; Naslavsky and Caplan 2018). Clathrin coats are also involved in protein secretion forming

72 exocytic transport vesicles derived from the trans-Golgi compartment and play a role in Golgi  
73 apparatus reassembly after mitotic cell division (Radulescu et al. 2007; Jaiswal et al. 2009).

74 Evolutionary adaptations of endocytic pathways to specific environmental niches and  
75 nutrient sources are especially relevant to species adopting a fully parasitic or commensal  
76 lifestyle (Poulin and Randhawa 2015; Jackson et al. 2016; Dacks and Field 2018; Pipaliya et al.  
77 2021). Within the extant Metamonada supergroup (Hampl et al. 2009; Hug et al. 2016; Burki et  
78 al. 2020), the parasitic protist *Giardia lamblia* (syn.: *intestinalis* or *duodenalis*) evolved a distinct  
79 endocytic pathway, which reflects its adaptation to the host intestinal lumen environment. This  
80 unicellular parasite is responsible for >300 million cases annually of water-borne infections  
81 causing gastroenteritis – giardiasis – with higher incidence in low to middle income countries  
82 (Caccio and Ryan 2008) (Caccio and Ryan 2008). *Giardia* is the etiological agent for  
83 symptomatic gastroenteritis in 15% of children in developing countries, with 1-2% fatality in  
84 children with severely compromised health status (Kotloff et al. 2013; Lanata et al. 2013). There  
85 is a strong association of *Giardia* infections with chronic conditions such as irritable bowel  
86 syndrome or inflammatory bowel disease as a result of intestinal barrier function disruption and  
87 microbiome dysregulation (Allain et al. 2017; Fekete et al. 2021).

88 Cellular evolution of the *Giardia* genus as an obligate parasite adapted to the small  
89 intestinal niche of vertebrates is characterised by a reduction in subcellular compartment  
90 diversity. Peroxisomes, late endosomes and a permanent stacked Golgi complex have not been  
91 detected in *Giardia* (Faso and Hehl 2011). Two nuclei (Benchimol 2005), an extensive  
92 endoplasmic reticulum (ER) (Soltys et al. 1996), highly reduced mitochondria-derived organelles  
93 – the mitosomes (Tovar et al. 2003) - and peripheral vesicles (PVs) (Lanfredi-Rangel et al.  
94 1998) are the only membrane-bounded organelles with conserved morphology and function  
95 documented in the *Giardia* trophozoite (Marti, Regös, et al. 2003; Zumthor et al. 2016;  
96 Cernikova et al. 2020).

97 The complex array of PV organelles as the only documented endocytic membrane  
98 compartment system in *Giardia* is responsible for uptake of fluid-phase and membrane-bound  
99 material (Rivero et al. 2011; Zumthor et al. 2016; Frontera et al. 2018). These organelles acidify  
100 and presumably serve as digestive compartments with capability for sorting after processing,  
101 similar to early and late endosomes and lysosomes (Lanfredi-Rangel et al. 1998). The static  
102 system of PV organelles (Abodeely et al. 2009; Zumthor et al. 2016) is restricted to the  
103 peripheral cortex below the plasma membrane (PM) of the *Giardia* trophozoite. PV morphology  
104 was investigated using high-resolution electron microscopy serial sectioning and three-  
105 dimensional reconstruction (Zumthor et al. 2016). These organelles were resolved as tubular

106 structures in close proximity to funnel-shaped invaginations of the PM (Zumthor et al. 2016). In  
107 the same report, the presence of focal accumulations of clathrin heavy chain (CHC) molecules  
108 and their main interactors, collectively termed clathrin assemblies, were demonstrated at PM  
109 and PV membrane interfaces.. The function of these stable focal assemblies as well as  
110 additional components at the interface of the PV membranes and the PM, has proved elusive  
111 (Zumthor et al. 2016). However, transient association of several members of the family of  
112 adaptor proteins (AP) suggests a role in dynamic processes linked to uptake of fluid-phase and  
113 receptor-bound material into PVs (Zumthor et al. 2016; Cernikova et al. 2020). Our current  
114 working model for bulk fluid-phase uptake of extracellular material into PVs invokes a “kiss and  
115 flush” mechanism, whereby acidified PV membranes and the PM transiently form channels at  
116 invaginations allowing exchange between PV lumen content and the extracellular space at  
117 regular intervals. Endocytosed material is digested in the sealed-off acidified PVs and  
118 transported towards the cell interior while residual material and waste is flushed to the  
119 extracellular space in the next round of membrane fusion, thus completing the PV cycle  
120 (Zumthor et al. 2016; Cernikova et al. 2020).

121  
122 In this report, we address open questions concerning *G. lamblia*'s PV ultrastructure and  
123 its associated molecular machinery in a comparative approach with one closely and one more  
124 distantly related fornicata and metamonada species, *Spironucleus sp.* and *Tritrichomonas*  
125 *foetus*, respectively. Using volumetric electron microscopy and super resolution light microscopy  
126 we developed a classification of PVs based on organelle morphology. Comparative analysis of  
127 *Giardia*'s PVs with endocytic compartments of fornicata and metamonada species emphasized  
128 the genus-specific nature of the *Giardia* endocytic system architecture. In addition, using a  
129 combination of co-immunoprecipitation and phylogeny techniques, we provide evidence that a  
130 proposed diverged clathrin light chain previously named *GICLC* (Zumthor et al. 2016) is unique  
131 to the *Giardia* genus and evolved *de novo* as structurally analogous to CLC after loss of a *bona*  
132 *fide* CLC in the last Fornicata common ancestor (LFCA). Taken together, the emergence of a  
133 unique and highly polymorphic endocytic system such as the one found in the genus *Giardia* is  
134 linked to the proposed convergent evolution of an independent CLC analogue concomitant with  
135 loss of a mostly conserved CLC orthologue.

136

## 137 **RESULTS AND DISCUSSION**

138 **Complete FIB-SEM rendering of a *G. lamblia* trophozoite reveals a novel landscape of**  
139 **vesicular compartments**

140 Volumetric scanning electron microscopy (vSEM) is currently considered the gold  
141 standard for the determination of biological ultrastructure (Titze and Genoud 2016). Focused ion  
142 beam electron scanning microscopy (FIB-SEM) uses a beam of gallium ions to mill and image  
143 consecutive layers of an embedded biological sample, resulting in a voxel resolution as low as  
144 1-2 nm (Kizilyaprak et al. 2014). This technique allows for sectioning and imaging of entire cells  
145 (Wei et al. 2012). It was previously implemented for partial rendering of *G. lamblia* trophozoite  
146 sections (Zumthor et al. 2016) and more recently in (Tůmová et al. 2020). Here we sectioned for  
147 the first time a complete *G. lamblia* trophozoite at a voxel resolution of 125 nm<sup>3</sup> (5x5x5 nm) after  
148 high pressure freezing (HPF) and embedding. Images representing the sagittal plane adjacent  
149 to the cell centre (figure 1A, 1D and supplementary figure 1A and B) show all the major cell  
150 compartments such as the nuclei (Figure 1A, N), the endoplasmic reticulum (Figure 1A, ER),  
151 mitochondria (Figure 1A and C, m) and elements of the cytoskeleton: axonemes (Ax), funis (F)  
152 and the ventral disc (VD) (Figure 1D; Dawson 2010). Two different types of small cytoplasmic  
153 organelles are observed: PVs (arrow heads) with heterogenous morphology and smaller and  
154 electron-dense membrane vesicles of uniform size and appearance which we termed Small  
155 Vesicles (SVs; asterisks) (figure 1B and E).

156 After serial sectioning and alignment with TrakEM (Cardona et al. 2012), we used the  
157 supervised machine learning (ML) tool Ilastik for pixel based image segmentation of PVs and  
158 SVs (Sommer et al. 2011; Berg et al. 2019). The algorithm collection performs supervised  
159 learning and recognition of patterns based on ground truth training provided by the user.  
160 Patterns are sorted into classes. Once the algorithm is trained on a subset of image data, it is  
161 used to analyse complete datasets and assigning features to different classes following a  
162 decision tree method (Sommer and Gerlich 2013; Kan 2017). This process enabled the three-  
163 dimensional rendering of selected trophozoite features: the complete cytoskeleton, the ER, PVs  
164 and mitochondria (supplementary figure 1C). In addition, we were able to calculate the volume of  
165 the cell at 138 μm<sup>3</sup> as well as the average volume of mitochondria organelles (N=14) at  
166 0.001093±0.0005698μm<sup>3</sup> with a 95% confidence interval between [0.0007643, 0.001422] μm<sup>3</sup>  
167 (supplementary figure 1D).

168 Similarly, supervised ML assisted pixel segmentation and object clustering analysis  
169 allowed identification of two statistically distinct morphological classes of PVs: spherical and  
170 tubular/elongated PVs. Individual PV organelles of both classes (N=467) were rendered in three  
171 dimensions (figure 1F and supplementary video 1). Spherical PVs average a volume of  
172 9.243x10<sup>-4</sup>±3.322x10<sup>-4</sup> μm<sup>3</sup> in a 95% confidence interval between [9.022x10<sup>-4</sup>; 9.022x10<sup>-4</sup>] μm<sup>3</sup>  
173 while tubular PVs average a volume of 1.067x10<sup>-3</sup>±3,322x10<sup>-4</sup> μm<sup>3</sup> with a 95% confidence

174 interval between  $[9.843 \times 10^{-4}; 1.150 \times 10^{-3}] \mu\text{m}^3$ , a statistically significant difference (t-student test,  
175  $p < 0.0001$ ), corroborating PV grouping in these two classes. To further investigate  
176 morphological heterogeneity of PVs, we analysed trophozoite ultrastructure using freeze  
177 fracture scanning electron microscopy. We documented PV heterogeneity and the presence of  
178 spherical and tubular PV forms (Supplementary Figure 2). Additional ultrastructural studies  
179 using transmission electron microscopy (TEM) were consistent with this classification  
180 (Supplementary figure 3A and B).

181 We proceeded with the rendering of 269 SVs – small spherical vesicles, with distinctly  
182 higher electron density than PVs and what could be a coat on the cytoplasmic side of the  
183 delimiting membrane (figure 1G). SVs were also identified by TEM (Supplementary figure 3),  
184 proximal to the PM. SVs average a volume of  $2.525 \times 10^{-4} \pm 9.280 \times 10^{-5} \mu\text{m}^3$  in a 95% confidence  
185 interval between  $[2.414 \times 10^{-4}; 2.637 \times 10^{-4}] \mu\text{m}^3$  (figure 1G, box-plot on the left). This equals to an  
186 average diameter of  $77.23 \pm 9.666$  nm in a 95% confidence interval between  $[76.07; 78.40]$  nm,  
187 differing significantly from spherical PVs which average  $120.1 \pm 9.507$  nm in a 95% confidence  
188 interval between  $[119.2; 121]$  nm ( $p < 0.0001$ ) (figure 1G, box-plot on the right). Thus, there is  
189 statistical support for SVs as a distinct category of membrane-bounded vesicles (Supplementary  
190 figure 3A and C).

191 Taken together, these findings lead us to hypothesize that, unlike previously thought,  
192 PVs are morphologically heterogenous and may comprise different functional categories  
193 (Poteryaev et al. 2010; Hipolito et al. 2018; Suresh et al. 2020). However, these data are  
194 currently insufficient to determine whether distinct morphologies correlate with distinct functions.

195

### 196 **Combining super-resolution microscopy with ML-assisted image analysis identifies three** 197 **classes of endocytic compartments in *G. lamblia* trophozoites**

198 FIB-SEM as a technique is not well-suited to the investigation of large cell numbers, and  
199 TEM cannot readily provide 3D volumetric information on subcellular compartments. Hence, to  
200 address PV heterogeneity in more detail, we continued our investigation of *Giardia* endocytic  
201 compartments by Super-resolution Light Microscopy (SRM) techniques and ML assisted image  
202 analysis of compartment shapes.

203 The dimensions of *Giardia* endocytic compartments are well below the diffraction limit of  
204 conventional light microscopy (Combs and Shroff 2017). To overcome the Abbe diffraction  
205 barrier we used stimulated emission depletion microscopy (STED), potentially achieving a  
206 lateral (x,y) and axial (z) resolution of 25-50 nm and 60-100 nm, respectively. This technique  
207 decreases the point spread function signal from the illuminated region (Klar et al. 2000; Willig et

208 al. 2006) and allows for accurate imaging of trophozoite PV lumina loaded with a highly  
209 photostable fluid phase marker (10 kDa Dextran-Alexa Fluor 594) which is readily taken up into  
210 PVs via the fluid phase endocytic pathway (Figure 2A and Supplemental Video 2). In addition to  
211 spherical and tubular PVs documented in FIB-SEM, using STED we also determined the  
212 presence of polymorphic dextran-labelled organelles i.e., spherical PVs with elongated rods  
213 (figure 2A). All labelled PVs were further analysed using the ML-assisted algorithm of the Ilastik  
214 program suite. We first performed supervised pixel segmentation followed by supervised object  
215 classification. In this second step, we defined and trained the classifier in three organelle  
216 morphologies: spherical, tubular, and polymorphic. The latter comprised characteristics of both  
217 vesicular and tubular classes, generally with spherical centres with attached tubular protrusions  
218 (Figure 2B). After organelle classification we measured their projected areas. Spherical  
219 organelles (N =1684) have an average projected area of  $0.0205 \pm 0.0169 \mu\text{m}^2$  with a 95%  
220 confidence interval between  $[0.0197; 0.0213] \mu\text{m}^2$ . Tubular endocytic organelles (N=835) present  
221 an average projected area of  $0.0453 \pm 0.0278 \mu\text{m}^2$  with a 95% confidence interval between  
222  $[0.0435; 0.0472] \mu\text{m}^2$ . Polymorphic organelles (N=400) have an average projected area of  
223  $0.0981 \pm 0.0429 \mu\text{m}^2$  with a 95% confidence interval between  $[0.0939; 0.102] \mu\text{m}^2$ . ANOVA  
224 analysis reveals that each of the three categories is indeed significantly distinct ( $p < 0.0001$ )  
225 based on projected surface area (Figure 2C). This lends further support to the possibility that PV  
226 morphological heterogeneity may have functional implications..

227 Although a STED microscopy-based approach clearly allows resolution of individual  
228 organelles as small as PVs, the distinctly lower axial resolution remains limiting for three-  
229 dimensional rendering of organelles. Therefore, to push the boundaries of resolution and to  
230 further characterize PV morphology, we employed Single Molecule Localization Microscopy  
231 (SMLM) (Kao et al. 1994; Huang et al. 2008; Jones et al. 2011).

232 *Giardia* PVs in trophozoites were loaded with a 10 kDa Dextran-Alexa Fluor 647 fluid  
233 phase marker with a high degree of photostability to survive repeated cycles of photoactivation  
234 and excitation in SMLM experiments (Dempsey et al. 2011; Olivier et al. 2013). After  
235 acquisition, images were reconstructed using the ImageJ plugin ThunderStorm which performs  
236 signal centroid calculation, image reconstruction and output (Schindelin et al. 2012; Ovesný et  
237 al. 2014). Dextran uptake in PVs was confirmed using conventional widefield microscopy  
238 (Figure 3A). STORM image reconstruction shows the subcellular distribution of the fluorescent  
239 marker and defines individual organelle lumina (Figure 3B). A closer inspection revealed the  
240 presence of morphologically distinct endocytic organelles as previously observed in our FIB-  
241 SEM and STED datasets (Figure 3B, ROI and Supplementary Video 3). We again used the

242 supervised ML-assisted algorithm in Ilastik to classify the different morphologies. After a pixel  
243 segmentation routine, we performed object classification using supervised ground truth training  
244 on subsets of organelles images. Three categories of PVs were defined: spherical, tubular and  
245 polymorphic (Figure 3C). To test whether the morphological categorization was consistent with  
246 categorization based on organelle volume, we calculated the average lumina volumes of >4000  
247 organelles from the three PV categories. ANOVA testing of organelle volumes for vesicular  
248 ( $0.00507 \pm 0.00336 \mu\text{m}^3$ , N=1989, 95% confidence interval: [0.00492; 0.00522]  $\mu\text{m}^3$ ), tubular  
249 ( $0.0103 \pm 0.00925 \mu\text{m}^3$  N=838, 95% confidence interval: [0.00967, 0.0109]  $\mu\text{m}^3$ ), and  
250 polymorphic organelles ( $0.0227 \pm 0.0214 \mu\text{m}^3$  N=1494, 95% confidence interval: [0.0216, 0.0238]  
251  $\mu\text{m}^3$  confirmed statistically significant ( $p < 0.0001$ ) morphological differences (Figure 3D and  
252 summarised in supplementary table 1) .

253 Taken together, the data generated using three distinct imaging techniques clearly  
254 demonstrates PV heterogeneity which may be linked to distinct functions and/or maturation  
255 states in this unique endocytic system. To reflect this novel finding and considering that these  
256 endocytic and peripherally localized organelles are neither proper vesicles nor canonical  
257 vacuoles, we propose renaming PVs to peripheral endocytic compartments (PECs).

258

### 259 **Comparative analysis of endocytic and secretory organelles in *Giardia*, *Spironucleus* sp. 260 and *T. foetus***

261 *Giardia* spp. have evolved a unique cell architecture including a dedicated organelle for  
262 attachment to the small intestinal epithelium – the ventral disk (VD) (Dawson 2010; Brown et al.  
263 2016). In turn, this innovation defines a distinct dorso-ventral as well as antero-posterior  
264 polarization of the flagellated trophozoite, marked by swimming directionality. PVs/PECs  
265 localize exclusively to the dome-shaped dorsal parasite PM except a small circular patch at the  
266 centre of the VD called the bare zone (Zumthor et al. 2016; Cernikova et al. 2020). The result is  
267 a maximally decentralized architecture of the *Giardia* endocytic system forming a single-layer  
268 interface of what we now appreciate as 3 morphologically distinct organelle classes between  
269 the cell exterior and the cytoplasm/ER (Abodeely et al. 2009; Zumthor et al. 2016). We asked  
270 whether this type of decentralized sub-PM localisation and polymorphic morphology of  
271 endocytic compartments was also represented in other tractable related members of the  
272 Diplomonadida and phylogenetically more distant metamonada lineages which do not have a  
273 VD, respectively *Spironucleus vortens* and *Spironucleus salmonicida* and the parabasalid  
274 *Tritrichomonas foetus*



275           The diplomonads *Spironucleus vortens* and *Spironucleus salmonicida* are amongst the  
276 closest tractable relatives of *G. lamblia* that can be grown axenically under similar conditions  
277 (Paull and Matthews 2001; Jørgensen and Sterud 2007; Kolisko et al. 2008a; Xu et al. 2014; Xu  
278 et al. 2016). Their endocytic compartments and machineries are partially characterized, with  
279 some reports of large vacuolar structures detected by electron microscopy in trophozoites  
280 (Sterud and Poynton 2002; Ástvaldsson et al. 2019). Unlike *Giardia*, both species lack dorso-  
281 ventral polarization but display a distinct antero-posterior axis. Putative endocytic organelles in  
282 *S. vortens* have been detected by fluorescence microscopy of live and fixed cells after  
283 incubation with fluorophore-coupled dextran (Zumthor et al. 2016). To further investigate these  
284 endocytic compartments, we incubated *S. vortens* and *S. salmonicida* trophozoites with a 10  
285 kDa Dextran-TexasRed fluid phase marker (Figure 4). In stark contrast to the distinctly arrayed  
286 PV/PEC labelling seen in *Giardia lamblia* (Figure 4A), confocal microscopy revealed the  
287 presence of several dispersed labelled organelles in both *S. vortens* (Figure 4B) and *S.*  
288 *salmonicida* (Figure 4C). *Spironucleus spp.* display several relatively large globular membrane  
289 compartments, similar to those observed in well-characterized model organisms (Huotari and  
290 Helenius 2011; Day et al. 2018) lacking a fixed subcellular localization. While *S. salmonicida*  
291 endocytic compartments localise mostly at the cell periphery (Figure 4C), *S. vortens* organelles  
292 present both peripheral and central localizations (Figure 4B and Supplementary Video 4). We  
293 also assessed endosome morphology in *T. foetus* using the same labelled dextran-based  
294 approach. Similar to *Spironucleus* species, *T. foetus* presents an antero-posterior axis but no  
295 attachment organelle nor dorso-ventral polarization. Similar to *Spironucleus spp.*, *T. foetus*  
296 accumulated the endocytosed fluid phase marker in several globular endocytic compartments  
297 (Figure 4D) consistent with previous reports on vacuolar structures identified in *T. foetus* by  
298 electron microscopy (Lealda et al. 1986). In our ultrastructure observations we could not detect  
299 multivesicular bodies or vacuoles containing intra-luminal vesicles in either *Spironucleus spp.*  
300 or *T. foetus*.

301           Taken together, these data show how, in closely-related protozoa lacking dorso-ventral  
302 polarization and a dedicated attachment organelle, endocytic organelles appear to have no  
303 specific localization. This lends support to the notion that PV organelle architecture is intimately  
304 associated to the emergence of the VD, both as adaptations to the mammalian small intestine  
305 niche (Zumthor et al., 2016).

306  
307           To visualize and measure morphological parameters of *Spironucleus* and *T. foetus*  
308 endocytic compartments, we performed 2D-STED imaging and transmission electron

309 microscopy (TEM). *S. vortens* cells loaded with 10 kDa Dextran-Alexa Fluor 594 showed  
310 accumulation of the fluid phase marker in roughly spherical organelles (Figure 5A). Labelled  
311 endocytic vacuoles have an average diameter of  $468 \pm 206$  nm (95% confidence interval  
312 [421;515] nm, N=10) (Figure 5A, box-plot). Volumetric rendering of 3D reconstructed optical  
313 sections document the uniformly globular morphology of these organelles (Supplementary  
314 Video 5). TEM analysis revealed an ellipsoid shape of endocytic organelles in *S. vortens* with an  
315 average maximal diameter of  $844 \pm 335$  nm in a 95% confidence interval between [763;905] nm  
316 (Figure 5B, box-plot). The dimensions measured in TEM represent those of the membrane-  
317 delimited organelle. In contrast, the dimensions measured by STED represent a projection of  
318 the fluid phase marker distribution within the available organelle lumen. The fact that the former  
319 ( $844 \pm 335$  nm) is larger than the latter ( $468 \pm 206$  nm) indicates that these organelles contain  
320 additional cargo which prevents the endocytosed fluid phase marker to distribute in the  
321 complete compartment volume delimited by the organelle membranes. TEM investigation in *S.*  
322 *salmonicida* cells (Supplemental Figure 4A) showed the presence of small globular vacuoles (V)  
323 close to the PM (Supplemental Figure 4B) with an average diameter of  $205 \pm 62.6$  nm (N=114) in  
324 a 95% confidence interval of [193;217] nm (Supplemental Figure 4E). These vacuoles are  
325 smaller than the ones found in *S. vortens* (Supplementary Figure 4C,D,F, p-value < 0.0001). In  
326 these conditions, neither coated vesicles nor a stacked Golgi apparatus could be documented in  
327 *S. vortens* or *S. salmonicida*.

328 2D-STED analysis of *T. foetus* cells incubated with 10 kDa Dextran-Alexa Fluor 594  
329 revealed a roughly circular distribution of the marker within endocytic vacuoles (Figure 6A and  
330 Supplemental Video 6) with an average maximal diameter of  $517 \pm 251$  nm (95% confidence  
331 interval [455;580] nm, N=10) (Figure 6A, box-plot). TEM imaging revealed the presence of two  
332 distinct classes of endosome-like vesicles (Figure 6B) based on electron density of the lumen.  
333 Low-density vesicles were identified both at the cell periphery and in central areas termed  
334 vacuoles (V); vesicles of higher electron density were previously identified as digestive vacuoles  
335 (DVs) (Lealda et al. 1986) and contain structured material and membranes. Analysis of TEM  
336 micrographs showed that DVs are significantly larger than vacuoles, with an average diameter  
337 of  $764 \pm 203$  nm (N=50) (95% confidence interval [707;822] nm). Vacuoles in turn have an  
338 average diameter of  $246 \pm 100$  nm (N=153) in (95% confidence interval [230;262] nm) (Figure  
339 6B, box-plot). Stacked Golgi organelles are abundant in TEM micrographs of *T. foetus*  
340 trophozoites, as documented previously (Rosa et al. 2014) (Supplemental Figure 5A).  
341 Consistent with a more canonical architecture of the membrane trafficking system in *T. foetus*,  
342 coated vesicles were observed in the cytosol particularly in the vicinity of Golgi stacks

343 (Supplemental Figure 5B) (Lealda et al. 1986; Midlej et al. 2011; Schlacht et al. 2014). These  
344 vesicles averaged a diameter of  $58.4 \pm 13.1$  nm (N=128) (95% confidence interval [56.1;60.7]  
345 nm) corresponding to the size range of clathrin coated vesicles (CCVs) (Traub 2011).

346  
347 Finally, to probe the dynamics of endocytic compartments in *G. lamblia*, *S. vortens*, *S.*  
348 *salmonicida* and *T. foetus*, cells were exposed to 10 kDa Dextran-TexasRed for 5, 10, 20 or 30  
349 minutes, fixed chemically, and imaged by confocal microscopy (Figure 7). The number of *G.*  
350 *lamblia* PECs labelled with the fluid-phase marker increased over time, with the label  
351 accumulating strictly at the cell periphery (Figure 7A). In contrast, endocytic compartments in *S.*  
352 *vortens* were first visualized at the PM, and were then observed at more central locations of the  
353 cell at later time points. Given the overall increase in fluorescent intensity and the motile nature  
354 of these organelles, it appears there is a constant uptake of dextran over the analysed period  
355 (Figure 7B). In these conditions, *S. salmonicida* and *T. foetus* vacuoles behave similarly since  
356 both sets of organelles are diffused within the cell cytoplasm, with a steady decrease and then  
357 marked increase in dextran content (Figure 7C and D).

358  
359 **G/CHC foci associate with different classes of giardial PECs with different stoichiometry**

360 Previously, we established that *Giardia* clathrin heavy chain (G/CHC) associates to  
361 discrete static foci at the dorsal PM of trophozoites, in close proximity to PV/PECs. Further,  
362 G/CHC strongly interacts with a putative albeit highly diverged *Giardia* clathrin light chain  
363 homologue previously named G/CLC (Zumthor et al. 2016; Cernikova et al. 2020). We  
364 wondered whether association to clathrin assemblies holds any relation to the heterogeneity of  
365 PV morphology. To address this question, we used STED microscopy to investigate epitope-  
366 tagged G/CHC (G/CHC-HA) deposition at distinct foci at the dorsal PM and the cell periphery,  
367 consistent with PV/PECs location (Figure 8A). Segmentation of foci using a ML-assisted Ilastik  
368 tool, allowed to determine the dimensions of G/CHC at an average diameter of  $134 \pm 36.6$  nm (N  
369 = 4524) (95% confidence interval [132;135] nm) (Figure 8B). Similar to G/CHC, subcellular  
370 distribution of epitope-tagged G/CLC (G/CLC-HA) showed an identical pattern consistent with its  
371 demonstrated direct interaction with G/CHC (figure 8C) (Zumthor et al. 2016). Segmentation of  
372 foci using a ML-assisted Ilastik tool, determined the dimensions of G/CLC foci at an average  
373 diameter of  $159 \pm 48.8$  nm (N = 984) (95% confidence interval [156;162] nm) (Figure 8D),  
374 Notably, the average size of G/CLC foci is larger than that of G/CHC foci ( $p < 0.0001$ , t-student  
375 test) (Figure 8E).

376 Using STED microscopy, we further determined the number of *G/CHC* foci showing  
377 signal overlap with the 3 classes of Dextran-Texas Red loaded PV/PECs (figure 8F). By  
378 calculating the degree of signal overlap between *G/CHC* foci and PEC lumina, we determined  
379 that spherical PECs are associated with at most one *G/CHC* focus with an average of  
380  $0.488 \pm 0.159$  foci per spherical PEC (95% confidence interval [0.403;0.573]). Tubular PECs  
381 associated with at least one *G/CHC* focus with an average of  $1.15 \pm 0.287$  foci per tubular PEC  
382 (95% confidence interval [0.994;1.3]). Polymorphic PECs associated with 3 or more *G/CHC* foci  
383 with an average of  $3.85 \pm 1.14$  foci per PEC (95% confidence interval [3.25;4.46]). Taken  
384 together, we find a directly proportional and statistically-significant ratio of clathrin foci to PEC  
385 size and type (ANOVA; p-value < 0.0001). This is in line with the notion that PV morphological  
386 heterogeneity is indeed correlated with organelle functional diversity, as measured by  
387 association to clathrin assemblies.

388

### 389 **Pan-eukaryotic searches for CHC and CLC reveal loss of a *bona fide* CLC within the** 390 ***fornicata* lineage and the emergence of putative CLC analogues**

391 We previously proposed that PV/PEC localization at the dorsal PM of trophozoites and  
392 evolution of the adhesive disc attachment organelle are interdependent adaptations to life in  
393 direct contact with the host's gut epithelium (Zumthor et al. 2016). Furthermore, we found a  
394 direct correlation between types of PV/PEC and the number of foci of clathrin assemblies. Given  
395 that the role for clathrin assemblies in *Giardia* has not been elucidated and that the nature of  
396 *G/CLC* (*GI4259*) as a clathrin light chain orthologue is dubious, we sought to shed light on the  
397 significance of this correlation by investigating the distribution of both CHC and CLC  
398 orthologues in selected eukaryotic lineages. To do this, we employed protein homology  
399 searches based on Hidden-Markov Models (HMM) (Eddy 2011) using as query an alignment of  
400 canonical and documented CHC or CLC sequences from several protozoa and metazoan  
401 species (Supplementary Tables 2 and 5) (Morgan et al. 2001; Kaksonen et al. 2005; Adung'a et  
402 al. 2013; Kirchhausen et al. 2014; Karnkowska et al. 2016; Karnkowska et al. 2019, Füßy et al.,  
403 2021 ). In our search we considered assembled read data from RNA-seq experiments  
404 (transcriptomics) as reliable as genomic sequence data (Cheon et al. 2020). In this case, we  
405 used the reference CHC or CLC sequences and performed tblastn searches. Nucleotide  
406 sequences from each reliable hit (lowest e-value) were translated and subjected to a reciprocal  
407 blast-p analysis to validate protein identity. We found CHC homologues in all selected genomes  
408 and transcriptomes we searched, highlighting the likely essential nature of CHC (Figure 9A and  
409 supplementary table 4 and 5).

410 *G*CHC is a clearly divergent ortholog compared to its counterpart in eukaryotic model  
411 organisms, with only 24% amino acid identity to human CHC (Marti, Regös, et al. 2003). A  
412 domain analysis of selected CHC sequences (supplementary figure 6 and supplemental table  
413 10) reveals that *G*CHC contains fewer  $\alpha$ -helical domains than other analysed CHC sequences,  
414 further highlighting its divergence. We also performed an in-depth search for the CHC triskelion  
415 uncoating “QLMLT” motif which we documented previously to be missing in *Giardia* (Fotin et al.  
416 2004; Rapoport et al. 2008; Zumthor et al. 2016). Notably, this motif appears to be only present  
417 in Metazoa and in the closely related Filastera and Choanoflagellata (King et al. 2008;  
418 Fairclough et al. 2013; Suga et al. 2013). In Fungi only a partial “L(M)TL” motif was identified and  
419 we were unable to detect a conserved uncoating motif in CHC sequences of members of the  
420 Archaeplastida, Amoebozoa or SAR supergroups (supplementary figure 7).

421 In stark contrast to CHC, the search for *bona fide* CLC sequences did not retrieve any  
422 reliable predictions in available genomes and transcriptomes from species of the Fornicata  
423 lineage, including the lineages Hexamitidae, Retortamonas and Carpediemonas-like organisms  
424 (Xu et al. 2014; Leger et al. 2017; Tanifuji et al. 2018; Füssy et al. 2021; Salas-Leiva et al.  
425 2021). Importantly, this search did not return the putative, highly diverged *G*CLC (Zumthor et  
426 al. 2016). There are documented CLC orthologues in members of the Discoba, such as  
427 *Trypanosoma brucei* CLC (Tb927.10.14760) (Manna et al. 2017) and in the parabasalid  
428 *Trichomonas vaginalis* (TVAG\_29749) (Carlton et al. 2007; Aurrecoechea et al. 2009).  
429 Furthermore, we readily identified a CLC homologue in *T. foetus* (gene accession OHT14195.1,  
430 forward HMMer e-value of 1.00E-26 and reverse Blastp e-value of 2.00E-11, returning the  
431 human CLC homologue) (Figure 9A). Therefore, while *bona fide* CLC orthologues can be  
432 readily identified in Discoba and Euglenozoa members and Preaxostyla – as in the metamonad  
433 *Monocercomonoides exilis* (Karnkowska et al. 2016) – no sequence could be found among  
434 members of the Fornicata lineage. Further, we were unable to identify a *bona fide* CLC  
435 sequence within the newly documented transcriptome of Hemimastigophora (Lax et al. 2018).  
436 These observations are in line with the notion that, unlike CHC, CLC is dispensable. This is also  
437 supported by failures to identify *bona fide* CLC in chromerids such as *Cryptosporidium parvum*  
438 and *Babesia bovis* (Woo et al. 2015) and in some ciliate lineages, such as *Tetrahymena*  
439 *thermophila* and *Paramecium caudatum* (Richardson and Dacks 2022).

440  
441 Given that *G*CLC’s predicted 3D structure is reminiscent of CLCs (Zumthor et al., 2016)  
442 but it could not be retrieved as related to a *bona fide* CLC, with its only known orthologue found  
443 in *Giardia muris* (Figure 9A), *G*CLC was further analysed using the HHPred suit, in the attempt

444 to find distantly-related non-*Giardia* sequences (Zimmermann et al. 2017). This search retrieved  
445 no robust prediction for a non-*Giardia* sequence (supplemental table 9). Given that the degree  
446 of divergence is such that no reliable claim to orthology can currently be supported and no  
447 orthologue for *GICLC* can be found outside the *Giardia* genus, we propose the renaming of  
448 *GICLC* to *Giardia lamblia* Analogous to Clathrin Light Chain- **GIACL**- as a CLC structural  
449 analogue acquired and retained in the last *Giardia* common ancestor (LGCA). This appears to  
450 correlate with loss of a *bona fide* CLC with the last Fornicata common ancestor (LFCA).

451 To test the extent of environmental pressure on this protein family's evolution, we  
452 calculated synonymous vs non-synonymous mutation ratios ( $\omega = ks/kn$ ) for *GIACL*  
453 homologues (supplemental figure 8). Interestingly, known sequences for all *Giardia* isolates  
454 present a  $\omega < 1$  which indicates that current sequences are not under selective pressure to  
455 evolve.

456 To further investigate the structural analogy of *GIACL* to canonical CLCs, we  
457 performed *in silico* modelling of its C-terminal domain ( ) using the new standard in *ab initio*  
458 protein structure modelling – AlphaFold - based on deep-learning neural networks (Jumper et al.  
459 2021; Tunyasuvunakool et al. 2021) (Figure 9B and supplemental table 11). Template modelling  
460 score independent of sequence (Tm-align) and Root Mean Square Deviation (RMSD) (Zhang  
461 and Skolnick 2005; Kufareva and Abagyan 2012) values provide substantial evidence for  
462 structural analogy of *GIACL* and canonical CLCs, in line with previous observations (Zumthor  
463 et al. 2016). The newly predicted structures for *GIACL* have a stronger resemblance to the  
464 predicted structure of a mammalian clathrin light chain (Wilbur et al. 2010). Altogether, the  
465 presented *in silico* data strongly suggest *GIACL* to be structural analogue of CLC.

466

#### 467 **SsCHC is distributed in the cytosol and interacts with a putative light chain structural** 468 **analogue**

469 We hypothesize that *GIACL* is a *Giardia*-specific CLC analogue, which arose *de novo*  
470 in the LGCA, possibly to supplant the loss of a *bona fide* CLC, We wondered whether *de novo*  
471 acquisition of a CLC analogue with divergent sequence but preservation of structural and  
472 potentially also functional features had occurred independently in other Diplomonadida lineages.  
473 To address this question, we selected *Spironucleus salmonicida* the closest genetically tractable  
474 and sequenced relative to *Giardia* (Jerlström-Hultqvist et al. 2012; Xu et al. 2014) in which a  
475 *bona fide* CLC cannot be detected, We expressed an epitope-tagged variant of the *S.*  
476 *salmonicida* CHC orthologue (SsCHC-3xHA) and detect it distributed in a punctate pattern  
477 throughout the trophozoite cytosol . Using higher resolution confocal microscopy , SsCHC-

478 3xHA was shown in cytoplasmic structures reminiscent of giardial CHC focal assemblies  
479 (Supplemental Figure 9A and B and Supplemental Video 7).

480 To probe for the presence of a CLC analogue in *Spironucleus*, we performed native co-  
481 immunoprecipitation experiments (native co-IP) using the SsCHC-3xHA-expressing *S.*  
482 *salmonicida* transgenic line. *In silico* analysis of the mass spectrometry dataset focused on the  
483 most abundant proteins pulled down with a minimum of 10 peptide hits using stringent criteria.  
484 This yielded 171 proteins which were either exclusive to the native co-IP sample derived from  
485 the transgenic reporter line, or  $\geq 3$ -fold enriched in the transgenic line compared to the non-  
486 transgenic parental strain (Supplemental Table 12). We identified several endocytosis-related  
487 proteins, with Ss-dynamin being the most abundant (48 hits and exclusive to SsCHC co-IP  
488 reaction), together with Ss- $\beta$ -adaptin, Ss-calmodulin and SsSec7 (Supplemental Figure 9C and  
489 D). Despite its intranuclear localization, annexin 5 is also found to be a putative interactor of  
490 SsCHC (Einarsson et al. 2019).

491 Since we postulated that a possible CLC analogue would be among the hypothetical  
492 proteins, we probed those hits using the HHPred algorithm (Zimmermann et al. 2017), focusing  
493 on candidates with predicted secondary structures composed of alpha-helical and coiled-coil  
494 domains and a size < 40 kDa, consistent with all CLC documented thus far. One of these,  
495 protein Ss50377\_11905, was found to be prominently pulled down and contains several coil-coil  
496 domains, at a predicted weight of 39kDa. The 150 amino acid C-terminus of the protein was  
497 modelled in AlphaFold and superimposed with CLC structures (supplementary figure 9E). TM-  
498 align values within structure similarity (0.5 or above), and RMSD values of *circa* 5-6 Å make a  
499 compelling case for Ss50377\_11905 to be a *S. salmonicida* CLC analogue, similar to GI<sub>1</sub>CLC.  
500 Using Ss11905, we also performed homology searches in the available transcriptome of the  
501 related diplomonad *Trepomonas sp.* (Kolisko et al. 2008b; Xu et al. 2016). We found a  
502 candidate ortholog, TPC1\_16039 (forward tblastn e-value of  $1E-5$  and reverse blastp e-value of  
503  $4E-12$ ) (supplementary table 11). Notably, however, searches using Ss50377\_11905 into the  
504 remaining fornicata representatives failed to retrieve candidate homologues, whether GI<sub>1</sub>CLC  
505 or other (data not shown). Protein structure modelling with AlphaFold and super-imposition with  
506 Ss11905, GI<sub>1</sub>CLC, *T. brucei* CLC and *H. sapiens* CLC suggest that TPC1\_16039 is also a  
507 structural CLC analogue, orthologous to Ss11905 (supplementary figure 10 ).

508

## 509 **DISCUSSION**

510 ***Giardia lamblia's* endocytic organelle system consists of three classes of small**  
511 **acidifying membrane compartments.**

512           Subsequent to ingestion and excystation, *Giardia* trophozoites attach to the intestinal  
513 lumen, proliferating and encysting on localised foci throughout the mucosa of the small intestine  
514 (Barash et al. 2017). Nutrients required for this propagation are taken up from the environment  
515 through PV/PEC-mediated endocytosis of fluid phase and membrane bound material (Lanfredi-  
516 Rangel et al. 1998; Adam 2001; Abodeely et al. 2009; Carranza and Lujan 2009; Cotton et al.  
517 2011; Zumthor et al. 2016; Touz et al. 2018). Despite the essential nature of these endocytic  
518 organelles, complete resolution of the ultrastructure of the *Giardia* endocytic pathway remains  
519 unsolved. To address this we performed an ultrastructural investigation of *G. lamblia* endocytic  
520 compartments to obtain a nanometric view of their morphology as defined by their membrane as  
521 well as the lumen accessible to fluid phase markers in labelling experiments (Abodeely et al.  
522 2009; Zumthor et al. 2016).

523           We began by dissecting an entire *G. lamblia* trophozoite using scanning electron  
524 microscopy and focused our analysis on PVs. These structures were segmented and rendered  
525 in three dimensions. Using this method unambiguously detected at least two distinct classes of  
526 PV morphologies, with some being obviously globular in shape while others presenting a more  
527 tubular nature. After expanding our analysis of PVs/PECs to super resolution light microscopy  
528 methods STED and STORM (Jacquemet et al. 2020) we determined that PVs/PECs are present  
529 in three discernible morphologies: spherical, tubular and polymorphic. Thus, we proposed the  
530 renaming of these organelles into peripheral endocytic compartments (PECs).

531           Furthermore, in line with previous reports (McCaffery et al. 1994; McCaffery and Gillin  
532 1994; Benchimol 2002; Zumthor et al. 2016), we also detected smaller vesicles (SVs) of around  
533 80 nm in radius which appear to be coated, based on their electron-dense surface, and are not  
534 related to CHC foci at the PV-PM interface. Identifying the nature of SV coats may shed light on  
535 their corresponding cargo. For instance, COPI components such as the small GTPase ARF1  
536 and  $\beta'$ -COPI were found to be located not only at the parasite's ER but also at the cell periphery  
537 (Marti, Regös, et al. 2003; Stefanic et al. 2006; Stefanic et al. 2009), in line with SV distribution.  
538 If indeed COPI were found to act as coat for these currently uncharacterized membrane  
539 carriers, an intriguing possibility emerges for SVs as vehicles for the trafficking of variant surface  
540 proteins (VSPs) to the *Giardia* cell surface. VSP secretion is compromised by the presence of  
541 brefeldin-A, implicating ARF-GTPase cycles in VSP trafficking (McCaffery et al. 1994; Lujan et  
542 al. 1995; Marti, Li, et al. 2003; Marti, Regös, et al. 2003). Currently, the exact mechanism for  
543 VSP translocation from the ER to the plasma membrane remains unknown, although it has  
544 been postulated that PVs/PECs may be involved. Furthermore, previous reports exclude the  
545 presence of an intermediate VSP trafficking compartment between the ER and the PM



546 detectable by microscopy (Marti, Li, et al. 2003; Marti, Regös, et al. 2003). Given the estimated  
547 diameter of SVs at ca. 80 nm, these compartments would have easily escaped detection in  
548 standard light microscopy experiments. An alternative hypothesis concerning SVs is that they  
549 are peroxisome derivatives. Recently, peroxisomes have been found in *Entamoeba histolytica*,  
550 a microaerophile like *Giardia*, with diameters between 90-100 nm, in the range of *Giardia* SVs  
551 (Verner et al. 2021). Furthermore, reports on immuno-EM detection of peroxisome-like proteins  
552 in *Giardia* highlighted the presence of small dense vesicles with diameters of *circa*. 100 nm  
553 (Acosta-Virgen et al. 2018) . Taken together, while we favour the hypothesis of SVs being  
554 secretory trafficking vesicles considering their apparent coating, the possibility of SVs  
555 corresponding to cryptic peroxisome-like organelles cannot be excluded.

556  
557 Compared to endosome-like vacuoles in *Carpodionomonas*-Like Organisms (CLOs)  
558 (Yubuki et al. 2013; Yubuki et al. 2016; Hamann et al. 2017) and large vesicular endosome-like  
559 structures observed in *S. salmonicida* and *S. vortens* and the more distantly related Parabasalia  
560 member, *T. foetus*, specific and complete remodelling of endosomes has occurred in the  
561 *Giardia* genus. *T. foetus*, except for the presence of endosome-like vesicles, presents digestive  
562 vacuoles and a stacked Golgi apparatus. Coated vesicles, likely CCVs, are observed near the  
563 *T. foetus* Golgi apparatus and the PM. In our analysis, we could not confirm fluid phase material  
564 uptake through the cytostome present in *Spironucleus* sp (Sterud and Poynton 2002). As  
565 noted, dextran accumulated in spherical vesicles of different dimensions and unknown origin,  
566 similar to endosomes. Figures 10A and B summarize the results of our comparative analysis  
567 and highlight the unique endocytic system in *Giardia* where, unlike related species and other  
568 excavates, PEC-mediated uptake is restricted to the dorsal side of the cell (Ebnetter and Hehl  
569 2014; Zumthor et al. 2016) while the ventral side is deputed to attachment to host structures.  
570 Interestingly, endosome and lysosome tubulation has been documented in macrophages  
571 (Hipolito et al. 2018; Suresh et al. 2020) and are linked with different physiological states of the  
572 organelles and subsequent function in the cell – like prompting the cell for phagocytosis. This  
573 does permit the hypothesis for the different kinds of PECs present in *G. lamblia* also  
574 representing different stages in organelle maturation and or active role at a given time. In line  
575 with this, we provide evidence for different stoichiometric association of CHC foci with different  
576 kinds of PECs. Naturally, only further biochemical dissection of *Giardia* endocytic pathway will  
577 help clarify the matter.

578

579 ***G. lamblia* possesses a highly divergent clathrin heavy chain and a newly acquired**  
580 **clathrin light chain analogue**

581 We performed an in-depth search for CHC homologs within excavates and other key  
582 eukaryotic groups. We found that CHC is conserved in all of these organisms, underlining the  
583 vital role of CHC in eukaryotic organisms. The sequence divergence of the giardial CHC protein  
584 is reflected in an overall decrease in the number of  $\alpha$ -helical domains which are essential for the  
585 formation of the triskelion leg, and hence necessary for coat assembly (Kirchhausen et al.  
586 2014). Thus, the reduction in  $\alpha$ -helical domains during *G*/CHC evolution, may have led to a  
587 lower propensity of *G*/CHC forming triskelion assemblies and membrane coats. So far, none of  
588 the many attempted methods to detect *G*/CHC in association with small vesicles have been able  
589 to show anything other than an exclusive focal localization at PVs/PEC membrane interfaces  
590 (Zumthor et al. 2016)). Also, the *G*/CHC protein does not contain the C-terminal uncoating motif  
591 “QLMLT” nor is this motif present in the CHC homologs of any diplomonad. In fact, this motif  
592 appears to be only present in Metazoa and in the closely related Filastera and Choanoflagellata  
593 (King et al. 2008; Fairclough et al. 2013; Suga et al. 2013) despite the documented ability to  
594 form and uncoat *bona fide* CCVs in some protozoa (Link et al. 2021). In Fungi only a partial  
595 “L(M)TL” motif was identified. We could not detect a conserved uncoating motif in CHC  
596 sequences of members of the Archaeplastida, Amoebozoa or SAR supergroups (supplementary  
597 figure 7). Taken together, this data indicates the uncoating QLMLT motif is apparently specific to  
598 and likely and invention of the Holozoa lineage. This observation points to as yet  
599 uncharacterised uncoating mechanisms are present in other lineages. For example, clathrin  
600 mediated endocytosis is essential in the parasitic protist *Trypanosoma brucei* and CCVs have  
601 been documented in this organism (Morgan et al. 2001; Allen et al. 2003; Adung’a et al. 2013;  
602 Link et al. 2021). Clathrin and other coat proteins associated with CCVs need to be recycled.  
603 While HSC70 is documented in *T. brucei* and likely involved in clathrin uncoating (Rapoport et  
604 al. 2008), no *bona fide* uncoating motif has been documented (Adung’a et al. 2013; Manna et al.  
605 2017; Link et al. 2021).

606  
607 In contrast to *G*/CHC, evolution of the previously identified putative *G*/CLC/*G*4259  
608 protein, presents a different and surprising natural history. This protein was identified as the  
609 strongest interactor of *G*/CHC (Zumthor et al. 2016) and is present in all sequenced *Giardia*  
610 lineages. *G*/CLC/*G*4259 has no measurable sequence conservation but a high degree of  
611 structural similarity to *bona fide* CLCs, warranting its proposed renaming to *G*/ACLIC. Aside from  
612 the *Giardia* genus, we were unable to identify homologues for *G*/ACLIC in any other eukaryotic

613 taxa , nor could we find any orthologues of CLC in any available Fornicata  
614 genome/transcriptome sequence, suggesting that the last Fornicata common ancestor (LFCA)  
615 lacked a canonical CLC. Taken together, the available data is currently insufficient to decide  
616 between two mutually exclusive evolutionary scenarios: 1) secondary loss of a canonical CLC in  
617 the last fornicate common ancestor, with acquisition of a structurally and functionally related  
618 *GIACLC*, or 2) massive sequence divergence of the original CLC due to significant changes in  
619 function particularly in *Giardia* where originally dynamic membrane coating machinery has  
620 evolved to become a static structural element supporting interfaces between plasma membrane  
621 and the endocytic system. The discovery of a strong interactor of CHC in the closely related *S.*  
622 *salmonicida* Ss11905, with structural similarity to *GIACLC* as well as to bona fide CLCs is  
623 consistent with both scenarios. Notably, this protein neither retrieves *GIACLC* nor CLCs in  
624 BLAST searches, leaving no evidence of direct homology. By contrast, robust predictions for  
625 CLC homologues were made for members of the Preaxostyla, Discoba and Parabasalia  
626 lineages. Nonetheless, other lineages appear also to have lost a bona fide CLC, like *C. parvum*  
627 and *T. thermophila* (Woo et al. 2015; Richardson and Dacks 2022), but perhaps similar  
628 investigations to ours of CHC may identify CLC analogues/divergent homologues. Taken  
629 together, this data suggests that the constraints on the CHC primary structure are higher than  
630 on CLC even after massive changes in clathrin coat function with demonstrated complete losses  
631 in some protists. Members of the *Giardia* genus as well as *S. salmonicida* have no identifiable  
632 *bona fide* CLC, yet, at least the giardial *GIACLC* has retained its function as a CHC interacting  
633 partner.

634 Our data provide a robust understanding of *Giardia*, *Hexamitidae* members, and  
635 *Tritrichomonas foetus* endocytic pathway organellar ultrastructure. Contrary to *Spironucleus* or  
636 *Tritrichomonas* and other excavates, *Giardia* underwent a complete remodelling of its endocytic  
637 machinery. Our analysis revealed its organelles to be polymorphic in nature, justifying the  
638 proposed name change to peripheral endocytic compartments. Our analysis of GCHC  
639 sequences highlights its divergence which is likely due to a massive reorganization of the  
640 endocytic pathway in these species, whilst origin and evolution of CLC structural and to some  
641 extent functional homologs in *Giardia* (*GIACLC*) and in certain *Hexamitidae* members (*S.*  
642 *salmonicida* and *Trepomonas* sp. PC1) remains uncertain.

643

## 644 **MATERIALS AND METHODS**

645

### 646 ***Cell culture and transfection***

647 *Giardia intestinalis* strain WB (clone C6; ATCC catalog number 50803) trophozoites were grown  
648 using standard methods as described in Morf et al. (Morf et al. 2010) Episomally- transfected  
649 parasites were obtained via electroporation of the circular pPacV-Integ-based plasmid prepared  
650 in *E. coli* as described in Zumthor et al. (Zumthor et al. 2016) Transfectants were selected using  
651 Puromycin (final conc. 50  $\mu\text{g ml}^{-1}$ ; InvivoGen). *Spironucleus vortens* and *Spironucleus*  
652 *salmonicida* were cultured as described before (Paull and Matthews 2001; Xu et al. 2014). *S.*  
653 *salmonicida* was transfected using a modified PAC vector and selected with Puromycin (final  
654 conc. 50  $\mu\text{g ml}^{-1}$ ; InvivoGen) (Jerlström-Hultqvist et al. 2012). *Tritrichomonas foetus* was  
655 axenically grown also as described (Lealda et al. 1986).

656

### 657 **Construction of expression vectors**

658 *Spironucleus salmonicida* CHC sequence (SS50377\_14164) was amplified with the primers  
659 ATATTTAATTAAGGCGGATCTATAGTTTCTTGGAACTAAATAGGA (forward) and  
660 TATGCGGCCGCCACCAGTTATCAGCGGGTGCC (reverse) containing a MluI and a NotI  
661 restriction site respectively. The genomic sequence amplified contained a 5' UTR region of  
662 179bp which encodes a putative promoter. The genomic fragment was inserted in the previously  
663 described vector pSpiro-PAC-3xHA-C (Jerlström-Hultqvist et al. 2012).

664

### 665 **Focused Ion Beam Scanning Electron Microscopy (FIB-SEM) of a full *Giardia* trophozoite** 666 **and image analysis**

667 Wild type *Giardia lamblia* trophozoites were subject to High Pressure Freezing, and processed  
668 as established in (Zumthor et al. 2016). Ion milling and Imaging was performed in a Auriga 40  
669 Crossbeam system (Zeiss, Oberkochen, Germany) using the FIBICS Nanopatterning engine  
670 (Fibics Inc., Ottawa, Canada) following the aforementioned established protocol. Pixel size was  
671 set to 5 nm, obtaining isotropic imaging. Alignment of the dataset was performed resorting to the  
672 ImageJ plugin Sift (Schindelin et al. 2012). Image segmentation was done using the semi-  
673 autonomous algorithm ilastik (Sommer et al. 2011). The routine of pixel and object classification  
674 and used. Algorithm training was performed in a small representative region of the dataset  
675 which was then applied to the complete dataset. Imaris (Bitplane AG) was used for three-  
676 dimensional rendering and volume measuring.

677

### 678 **Transmission Electron Microscopy analysis of *Giardia lamblia*, *Spironucleus spp.* and** 679 ***Tritrichomonas foetus* cells and analysis**

680 *G. lamblia*, *S. vortens*, *S. salmonicida* and *Tritrichomonas foetus* samples were subject to high  
681 pressure freezing and processed as we previously established (Gaechter et al. 2008; Zumthor  
682 et al. 2016). Samples were imaged in a FEI CM100 Transmission Electron Microscope. Pixel  
683 size was assigned to 0.8 nm. Tiles were obtained automatically after determination of focal  
684 point. Tiles were aligned with TrakEM2 (Cardona et al. 2012).

685

### 686 **Immunofluorescence Assays**

687 Chemically fixed cells for subcellular recombinant protein localization were prepared as  
688 previously described (Konrad et al. 2010). HA-epitope tagged recombinant proteins were  
689 detected using a rat-derived monoclonal anti-HA antibody (dilution 1:200, Roche) followed by a  
690 secondary anti-rat antibody coupled to AlexaFluor 488 fluorophores (dilution 1:200, Invitrogen).  
691 Samples were embedded in Vectashield (VectorLabs) or Prolong Diamond Mounting medium  
692 (Invitrogen) containing 4',6-diamidino-2-phenylindole (DAPI) for nuclear staining.

693

694

695

### 696 **Fluid phase marker uptake**

697 Dextran uptake assays were performed as described in (Gaechter et al. 2008; Zumthor et al.  
698 2016) using Dextran 10kDa at 2mg/mL (Invitrogen). Coupled fluorophore was chosen based on  
699 image technique chosen. Immunostaining was performed as described above with the  
700 exception of using only 0.02% Triton-X100 (Sigma) in 2% BSA (Sigma) for permeabilization, to  
701 prevent leakage and loss of Dextran signal. Intensities were calculated with a costume  
702 developed macro in Fiji/ImageJ (Schindelin et al. 2012), resorting to WEKA algorithms for  
703 segmentation (Arganda-Carreras et al. 2017).

704

### 705 **Laser Scan Confocal Microscopy (LSCM)**

706 Imaging was performed in an inverted Confocal Laser Scanning Microscope Leica SP8 using  
707 appropriate parameters. Confocal images were subsequently deconvolved using Huygens  
708 Professional (<https://svi.nl/Huygens-Professional>) and analysed using Fiji/ImageJ (Schindelin et  
709 al. 2012).

710

### 711 **Stimulated Emission Depletion (STED) Microscopy**

712 Sample preparation was done as described for LSCM. For imaging, samples were mounted in  
713 ProLong Diamond antifade reagent (Thermo Fisher Scientific). Super resolution microscopy was

714 performed on a LSCM SP8 gSTED 3X Leica (Leica Microsystems) using appropriate gating  
715 settings. Nuclear labelling was omitted due to possible interference with the STED laser. A  
716 pulse depletion laser of 775 nm at 100% strength was used to deplete signal coming from  
717 samples using the fluorophore Alexa Fluor 594. Signal from samples containing Alexa Fluor 488  
718 were depleted with the depletion laser line 592 nm at 50% strength. Pinhole was kept at 1 AU.  
719 Images were deconvolved using Huygens Professional (<https://svi.nl/Huygens-Professional>).  
720 After deconvolution, signal was segmented following a pixel and object classification routine in  
721 ilastik. Thresholding was processed in Fiji/ImageJ (Schindelin et al. 2012) with respective  
722 calculation of organelle area.

723

### 724 **Single Molecule Localization Microscopy (SMLM)**

725 Cells were fixed into a coverslip using a cytospin (6 min, 600 g). Samples were then embedded  
726 in Vectashield based imaging medium (Olivier et al. 2013). Excess buffer was dried up and  
727 samples were sealed. Single Molecule Imaging was performed on a on a Leica SR-GSD 3D  
728 microscope (Leica Microsystems) as described in (Mateos et al. 2016) with a cylindrical  
729 lenses, in order to image the apical cell region, giving a z-depth of about 800 nm.. A  
730 minimum of 100 000 events were recorded. Image reconstruction was performed with the  
731 ImageJ plugin Thunderstorm (Ovesný et al. 2014). Reconstructed images were segmented  
732 following a pixel and object classification routine in ilastik (Sommer et al. 2011; Berg et al.  
733 2019). Thresholding and volume calculation was performed in Imaris (Bitplane AG).

734

### 735 **Native Co-immunoprecipitation of *S. salmonicida* CHC**

736 Co-immunoprecipitation assays on control wild type *S. salmonicida* and transgenic *S.*  
737 *salmonicida* bearing the HA-tagged CHC were processed as previously established (Zumthor et  
738 al. 2016) in non-cross-linking conditions agent.

739

### 740 **Protein analysis and sample preparation for mass spectrometry (MS)-based protein 741 identification**

742 SDS-PAGE analysis was performed on 4%-10% polyacrylamide gels under reducing conditions.  
743 Blotting was done as described in (Konrad et al. 2010) using primary rat-derived anti-HA  
744 antibody (dilution 1:500, Roche) followed by anti-rat (dilution 1:2000; Southern Biotech) antibody  
745 coupled to horseradish peroxidase. Gels for mass spectroscopy (MS) analysis were stained with  
746 Instant blue (Expedeon) and de-stained with ultrapure water. MS-based protein identification  
747 was performed as previously reported (Zumthor et al. 2016).

748

## 749 **In silico co-immunoprecipitation dataset analysis**

750 The co-IP datasets derived from transgenic cells expressing epitope-tagged “baits” as affinity  
751 handles were filtered using dedicated control co-IP datasets generated from non-transgenic  
752 wild-type parasites to identify candidate interaction partners unique to bait-specific datasets.  
753 This was done using Scaffold4 (<http://www.proteomesoftware.com/products/scaffold/>). Unless  
754 otherwise indicated, bait-derived co-IP data was filtered using high stringency parameters  
755 (Exclusive Spectrum Counts at 95-2-95, 0% FDR) and manually curated to rank putative  
756 interaction partners in a semi-quantitative fashion using ESCs as a proxy for relative  
757 abundance. Only proteins with more than 10 hits were considered. Proteins in both datasets  
758 were only considered if present 3-fold in the transgenic line versus the control. *In silico* analysis  
759 of hypothetical proteins was mainly carried out using BLASTp for protein homology detection  
760 (<http://blast.ncbi.nlm.nih.gov/Blast.cgi?PAGE=Proteins>) and HHPred  
761 (<http://toolkit.tuebingen.mpg.de/hhpred>) for protein homology detection based on Hidden  
762 Markov Model (HMM-HMM) comparisons and a cut-off at e-value < 0.05 was implemented to  
763 assign *in silico* annotation to otherwise non-annotated proteins of unknown function  
764 (Zimmermann et al. 2017).

765 Protein structure was modelled with the *ab initio* modelling tool AlphaFold  
766 (<https://alphafold.ebi.ac.uk/>) from Alphabet, powered by Google DeepMind  
767 (<https://deepmind.com/>) deep learning neural network algorithms (Jumper et al. 2021;  
768 Tunyasuvunakool et al. 2021). Modelling was done via Google Colab in a Jupyter notebook  
769 environment(<https://colab.research.google.com/github/deepmind/alphafold/blob/main/notebooks/>).

770 TM-align calculation was performed online in the server: <https://zhanggroup.org/TM-score/>.

771 Pymol (The PyMOL Molecular Graphics System, Version 2.0 Schrödinger, LLC.) was used for  
772 protein structure prediction visualisation, superimposing and RMSD calculation using the  
773 *cealign* command.

774

## 775 **Data Availability**

776 Access to raw mass spectrometry data is provided through the ProteomeXchange  
777 Consortium on the PRIDE platform (Perez-Riverol et al. 2019). Data is freely available using  
778 project accession number and project DOI. Project DOI/accession number for datasets derived  
779 from bait specific and control co-IP MS analyses are as follows: PXD020201.

780

## 781 **Homologue search and Phylogenetic analysis and tree construction**

782 CHC and CLC sequences were probed among several available genomes and transcriptomes  
783 with special focus within the fornicata members. Query protein sequences for CHC and CLC  
784 from several pan-eukaryotic representatives were obtained and aligned using MUSCLE v.3.8.31  
785 (Edgar 2004) (Supplementary Table 2). Resulting alignments were used to generate Hidden  
786 Markov Models using the hmmbuild option and HHMer searches were made on all available  
787 genomes with an e-value cutoff to 0.01 (Eddy 2011). Hits were considered valid if reciprocal  
788 BLASTp returned a *Homo sapiens* homologue with a e-value < 0.05. Transcriptome searches  
789 were carried out resorting to tBLASTn searches using the *Homo sapiens* and  
790 *Monocercomonoides exilis* respective sequences for CHC or CLC. Once a hit was found it was  
791 translated into an amino acid sequence and was considered valid if it pulled a *Homo sapiens*  
792 homolog with an e-value < 0.05. All found sequences can be found in supplementary tables 2 to  
793 9. Protein domain searches were performed at the Conservate Domain Database (CDD),  
794 through the Pfam database (Lu et al. 2020; Mistry et al. 2021). The InterPro and SMART  
795 platforms were also used for domain classification (Letunic and Bork 2017; Mitchell et al. 2019).  
796 Synonymous vs non-synonymous mutation ratio was calculated with an available online  
797 software (<http://services.cbu.uib.no/tools/kaks>) following maximum likelihood parameters.

798

#### 799 **Statistical analysis and further used software**

800 All data was analysed for statistical significance and plotted using Prism 9 (Graphpad,  
801 <https://www.graphpad.com/scientific-software/prism/>) software. Images were composed using  
802 Affinity Designer software (<https://affinity.serif.com/en-gb/>). Video processing was made using  
803 Da Vinci Resolve v17.3.

804

#### 805 **ACKNOWLEDGMENTS**

806 ABH and CF are funded by Swiss National Foundation grant 31003A-166437 and  
807 PR00P3\_179813, respectively. Imaging and image analysis were performed with equipment  
808 from the Centre of Microscopy and Image Analysis (ZMB) of the University of Zurich. We thank  
809 the following members of the ZMB for technical and scientific support: Dr. Jana Döhner, Dr.  
810 Moritz Kirchmann, Dr. Dominik Hänni, Dr. José Mateos and Dr. Urs Ziegler. Finally we would  
811 like to thank members of the Hehl lab for insightful discussions.

812

#### 813 **CONFLICTS OF INTEREST**

814 No conflicts of interest

815



816 **AUTHOR CONTRIBUTIONS**

817 RS, ABH and CF designed and curated the study. RS performed all experiments and analysed  
818 all ensuing experimental data with the exception of *Spironucleus salmonicida* culturing and  
819 uptake experiments performed by AA and SS, and SEM experiments performed by JPZ. SVP,  
820 RS and JBD performed molecular phylogeny analyses. RS, ABH and CF wrote and revised the  
821 manuscript. All authors read and approved the final manuscript prior to submission.

822

823

824 **REFERENCES**

- 825 Abodeely M, DuBois KN, Hehl A, Stefanic S, Sajid M, DeSouza W, Attias M, Engel JC, Hsieh I,  
826 Fetter RD, et al. 2009. A contiguous compartment functions as endoplasmic reticulum and  
827 endosome/lysosome in *Giardia lamblia*. *Eukaryot. Cell* [Internet] 8:1665–1676. Available  
828 from:  
829 [http://www.pubmedcentral.nih.gov/articlerender.fcgi?artid=2772394&tool=pmcentrez&rend](http://www.pubmedcentral.nih.gov/articlerender.fcgi?artid=2772394&tool=pmcentrez&rendertype=abstract)  
830 [ertype=abstract](http://www.pubmedcentral.nih.gov/articlerender.fcgi?artid=2772394&tool=pmcentrez&rendertype=abstract)
- 831 Acosta-Virgen K, Chávez-Munguía B, Talamás-Lara D, Lagunes-Guillén A, Martínez-Higuera A,  
832 Lazcano A, Martínez-Palomo A, Espinosa-Cantellano M. 2018. *Giardia lamblia*:  
833 Identification of peroxisomal-like proteins. *Exp. Parasitol.* 191:36–43.
- 834 Adam RD. 2001. Biology of *Giardia lamblia*. *Clin. Microbiol. Rev.* 14:447–469.
- 835 Adung'a VO, Gadelha C, Field MC. 2013. Proteomic Analysis of Clathrin Interactions in  
836 Trypanosomes Reveals Dynamic Evolution of Endocytosis. *Traffic* 14:440–457.
- 837 Allain T, Amat CB, Motta JP, Manko A, Buret AG. 2017. Interactions of *Giardia* sp. with the  
838 intestinal barrier: Epithelium, mucus, and microbiota. *Tissue Barriers* 5:1–16.
- 839 Allen CL, Goulding D, Field MC. 2003. Clathrin-mediated endocytosis is essential in  
840 *Trypanosoma brucei*. *EMBO J.* 22:4991–5002.
- 841 Arganda-Carreras I, Kaynig V, Rueden C, Eliceiri KW, Schindelin J, Cardona A, Seung HS.  
842 2017. Trainable Weka Segmentation: A machine learning tool for microscopy pixel  
843 classification. *Bioinformatics* 33:2424–2426.
- 844 Ástvaldsson Á, Hultenby K, Svärd SG, Jerlström-Hultqvist J. 2019. Proximity Staining Using  
845 Enzymatic Protein Tagging in Diplomonads. *mSphere* [Internet] 4:1–15. Available from:  
846 <http://msphere.asm.org/lookup/doi/10.1128/mSphereDirect.00153-19>
- 847 Aurrecochea C, Brestelli J, Brunk BP, Carlton JM, Dommer J, Fischer S, Gajria B, Gao X,  
848 Gingle A, Grant G, et al. 2009. GiardiaDB and TrichDB: Integrated genomic resources for  
849 the eukaryotic protist pathogens *Giardia lamblia* and *Trichomonas vaginalis*. *Nucleic Acids*

- 850           *Res.* 37:526–530.
- 851 Barash NR, Nosala C, Pham JK, Mcinally SG, Gourguechon S, Dawson SC. 2017. Giardia  
852 Colonizes and Encysts in High- Density Foci in the Murine Small Intestine. *mSphere* 2:1–  
853 20.
- 854 Benchimol M. 2002. A new set of vesicles in Giardia lamblia. *Exp. Parasitol.* [Internet] 102:30–  
855 37. Available from: <http://linkinghub.elsevier.com/retrieve/pii/S001448940200142X>
- 856 Benchimol M. 2005. The nuclei of Giardia lamblia - new ultrastructural observations. *Arch.*  
857 *Microbiol.* [Internet] 183:160–168. Available from:  
858 <http://www.ncbi.nlm.nih.gov/pubmed/15703885>
- 859 Berg S, Kutra D, Kroeger T, Straehle CN, Kausler BX, Haubold C, Schiegg M, Ales J, Beier T,  
860 Rudy M, et al. 2019. Ilastik: Interactive Machine Learning for (Bio)Image Analysis. *Nat.*  
861 *Methods* [Internet] 16:1226–1232. Available from: [http://dx.doi.org/10.1038/s41592-019-](http://dx.doi.org/10.1038/s41592-019-0582-9)  
862 0582-9
- 863 Brown JR, Schwartz CL, Heumann JM, Dawson SC, Hoenger A. 2016. A detailed look at the  
864 cytoskeletal architecture of the Giardia lamblia ventral disc. *J. Struct. Biol.* [Internet]  
865 194:38–48. Available from: <http://linkinghub.elsevier.com/retrieve/pii/S1047847716300107>
- 866 Burki F, Roger AJ, Brown MW, Simpson AGB. 2020. The New Tree of Eukaryotes. *Trends Ecol.*  
867 *Evol.* [Internet] 35:43–55. Available from: <https://doi.org/10.1016/j.tree.2019.08.008>
- 868 Caccio SM, Ryan U. 2008. Molecular epidemiology of giardiasis. *Mol. Biochem. Parasitol.*  
869 160:75–80.
- 870 Cardona A, Saalfeld S, Schindelin J, Arganda-Carreras I, Preibisch S, Longair M, Tomancak P,  
871 Hartenstein V, Douglas RJ. 2012. TrakEM2 software for neural circuit reconstruction. *PLoS*  
872 *One* 7.
- 873 Carlton JM, Hirt RP, Silva JC, Delcher AL, Schatz M, Zhao Q, Wortman JR, Bidwell SL, Alsmark  
874 UCM, Besteiro S, et al. 2007. Draft Genome Sequence of the Sexually Transmitted  
875 Pathogen Trichomonas vaginalis. *Science* (80-. ). 315:207–213.
- 876 Carranza PG, Lujan HD. 2009. New insights regarding the biology of Giardia lamblia. *Microbes*  
877 *Infect.* 12:71–80.
- 878 Cernikova L, Faso C, Hehl AB. 2020. Phosphoinositide-binding proteins mark, shape and  
879 functionally modulate highly-diverged endocytic compartments in the parasitic protist  
880 Giardia lamblia. Available from: <http://dx.doi.org/10.1371/journal.ppat.1008317>
- 881 Cheon S, Zhang J, Park C. 2020. Is phylotranscriptomics as reliable as phylogenomics? *Mol.*  
882 *Biol. Evol.* 37:3672–3683.
- 883 Combs CA, Shroff H. 2017. Fluorescence microscopy: A concise guide to current imaging

- 884 methods. *Curr. Protoc. Neurosci.* 2017:2.1.1-2.1.25.
- 885 Cotton JA, Beatty JK, Buret AG. 2011. Host parasite interactions and pathophysiology in Giardia  
886 infections. *Int. J. Parasitol.* 41:925–933.
- 887 Dacks JB, Field MC. 2018. Evolutionary origins and specialisation of membrane transport. *Curr.*  
888 *Opin. Cell Biol.* [Internet] 53:70–76. Available from:  
889 <https://doi.org/10.1016/j.ceb.2018.06.001>
- 890 Dawson SC. 2010. An insider's guide to the microtubule cytoskeleton of Giardia. *Cell. Microbiol.*  
891 12:588–598.
- 892 Day KJ, Casler JC, Glick BS. 2018. Budding Yeast Has a Minimal Endomembrane System.  
893 *Dev. Cell* [Internet] 44:56-72.e4. Available from:  
894 <https://doi.org/10.1016/j.devcel.2017.12.014>
- 895 Dempsey GT, Vaughan JC, Chen KH, Bates M, Zhuang X. 2011. Evaluation of fluorophores for  
896 optimal performance in localization-based super-resolution imaging. *Nat. Methods*  
897 [Internet] 8:1027–1036. Available from:  
898 <http://www.nature.com/doi/10.1038/nmeth.1768>
- 899 Ebnetter JA, Hehl AB. 2014. The single epsin homolog in Giardia lamblia localizes to the ventral  
900 disk of trophozoites and is not associated with clathrin membrane coats. *Mol. Biochem.*  
901 *Parasitol.* [Internet] 197:24–27. Available from:  
902 <http://linkinghub.elsevier.com/retrieve/pii/S0166685114001388>
- 903 Eddy SR. 2011. Accelerated profile HMM searches. *PLoS Comput. Biol.* 7.
- 904 Edgar RC. 2004. MUSCLE: Multiple sequence alignment with high accuracy and high  
905 throughput. *Nucleic Acids Res.*
- 906 Einarsson E, Ástvaldsson Á, Hultenby K, Andersson JO. 2019. Comparative Cell Biology and  
907 Evolution of Annexins in Diplomonads. *mSphere* 1:1–16.
- 908 Fairclough SR, Chen Z, Kramer E, Zeng Q, Young S, Robertson HM, Begovic E, Richter DJ,  
909 Russ C, Westbrook MJ, et al. 2013. Premetazoan genome evolution and the regulation of  
910 cell differentiation in the choanoflagellate *Salpingoeca rosetta*. *Genome Biol.* 14:1–15.
- 911 Faso C, Hehl AB. 2011. Membrane trafficking and organelle biogenesis in Giardia lamblia: Use  
912 it or lose it. *Int. J. Parasitol.* 41:471–480.
- 913 Fekete E, Allain T, Siddiq A, Sosnowski O, Buret AG. 2021. Giardia spp. and the Gut  
914 Microbiota: Dangerous Liaisons. *Front. Microbiol.* 11.
- 915 Fotin A, Cheng Y, Grigorieff N, Walz T, Harrison SC, Kirchhausen T. 2004. Structure of an  
916 auxilin-bound clathrin coat and its implications for the mechanism of uncoating. *Nature*  
917 [Internet] 429:2004. Available from: <http://mcb.asm.org/lookup/doi/10.1128/MCB.00448-15>

- 918 Frontera LS, Moyano S, Quassollo G, Lanfredi-Rangel A, Rópolo AS, Touz MC. 2018.  
919 Lactoferrin and lactoferricin endocytosis halt Giardia cell growth and prevent infective cyst  
920 production. *Sci. Rep.* [Internet] 8:18020. Available from:  
921 <http://www.nature.com/articles/s41598-018-36563-1>
- 922 Füssy Z, Vinopalová M, Treitli SC, Pánek T, Smejkalová P, Čepička I, Doležal P, Hampl V.  
923 2021. Retortamonads from vertebrate hosts share features of anaerobic metabolism and  
924 pre-adaptations to parasitism with diplomonads. *Parasitol. Int.* 82.
- 925 Gaechter V, Schraner E, Wild P, Hehl AB. 2008. The single dynamin family protein in the  
926 primitive protozoan giardia lamblia is essential for stage conversion and endocytic  
927 transport. *Traffic* 9:57–71.
- 928 Hamann E, Tegetmeyer HE, Riedel Di, Littmann S, Ahmerkamp S, Chen J, Hach PF, Strous M.  
929 2017. Syntrophic linkage between predatory Carpediemonas and specific prokaryotic  
930 populations. *ISME J.* [Internet] 11:1205–1217. Available from:  
931 <http://dx.doi.org/10.1038/ismej.2016.197>
- 932 Hampl V, Hug L, Leigh JW, Dacks JB, Lang BF, Simpson AGB, Roger AJ. 2009. Phylogenomic  
933 analyses support the monophyly of Excavata and resolve relationships among eukaryotic  
934 “supergroups.” *PNAS* 106:3859–3864.
- 935 Heimerl T, Flechsler J, Pickl C, Heinz V, Salecker B, Zweck J, Wanner G, Geimer S, Samson  
936 RY, Bell SD, et al. 2017. A complex endomembrane system in the archaeon Ignicoccus  
937 hospitalis tapped by Nanoarchaeum equitans. *Front. Microbiol.* 8:1–13.
- 938 Hipolito VEB, Ospina-Escobar E, Botelho RJ. 2018. Lysosome remodelling and adaptation  
939 during phagocyte activation. *Cell. Microbiol.* 20:1–8.
- 940 Huang B, Wang W, Bates M, Zhuang X. 2008. Three-Dimensional Super-Resolution  
941 Reconstruction Microscopy. *Science (80- )*. [Internet] 319:810–813. Available from:  
942 <http://www.ncbi.nlm.nih.gov/pubmed/18174397>
- 943 Hug LA, Baker BJ, Anantharaman K, Brown CT, Probst AJ, Castelle CJ, Butterfield CN,  
944 Hemsdorf AW, Amano Y, Kotaro I, et al. 2016. A new view of the tree and life’s diversity.  
945 *Nat. Microbiol.* 48.
- 946 Huotari J, Helenius A. 2011. Endosome maturation. *EMBO J.* [Internet] 30:3481–3500.  
947 Available from: <http://dx.doi.org/10.1038/emboj.2011.286>
- 948 Jackson AP, Otto TD, Aslett M, Armstrong SD, Bringaud F, Schlacht A, Hartley C, Sanders M,  
949 Wastling JM, Dacks JB, et al. 2016. Kinetoplastid Phylogenomics Reveals the Evolutionary  
950 Innovations Associated with the Origins of Parasitism. *Curr. Biol.* [Internet] 26:161–172.  
951 Available from: <http://dx.doi.org/10.1016/j.cub.2015.11.055>

- 952 Jacquemet G, Carisey AF, Hamidi H, Henriques R, Leterrier C. 2020. The cell biologist's guide  
953 to super-resolution microscopy. *J. Cell Sci.* 133.
- 954 Jaiswal JK, Rivera VM, Simon SM. 2009. Exocytosis of Post-Golgi Vesicles Is Regulated by  
955 Components of the Endocytic Machinery. *Cell* [Internet] 137:1308–1319. Available from:  
956 <http://dx.doi.org/10.1016/j.cell.2009.04.064>
- 957 Jerlström-Hultqvist J, Einarsson E, Svärd SG. 2012. Stable transfection of the diplomonad  
958 parasite *Spironucleus salmonicida*. *Eukaryot. Cell* 11:1353–1361.
- 959 Jones SA, Shim S-H, He J, Zhuang X. 2011. Fast, three-dimensional super-resolution imaging  
960 of live cells. *Nat. Methods* [Internet] 8:499–505. Available from:  
961 <http://www.nature.com/doi/10.1038/nmeth.1605>
- 962 Jørgensen A, Sterud E. 2007. Phylogeny of *Spironucleus* (Eopharyngia: Diplomonadida:  
963 Hexamitinae). *Protist* 158:247–254.
- 964 Jumper J, Evans R, Pritzel A, Green T, Figurnov M, Ronneberger O, Tunyasuvunakool K, Bates  
965 R, Židek A, Potapenko A, et al. 2021. Highly accurate protein structure prediction with  
966 AlphaFold. *Nature* [Internet] 596:583–589. Available from:  
967 <http://dx.doi.org/10.1038/s41586-021-03819-2>
- 968 Kaksonen M, Roux AAA. 2018. Mechanisms of clathrin-mediated endocytosis. *Nat. Rev. Mol.*  
969 *Cell Biol.* [Internet] 19:313–326. Available from: <http://dx.doi.org/10.1038/nrm.2017.132>
- 970 Kaksonen M, Toret CP, Drubin DG. 2005. A modular design for the clathrin- and actin-mediated  
971 endocytosis machinery. *Cell* 123:305–320.
- 972 Kan A. 2017. Machine learning applications in cell image analysis. *Immunol. Cell Biol.* 95:525–  
973 530.
- 974 Kao HP, Kao HP, Verkman a S, Verkman a S. 1994. Tracking of Single Fluorescent Particles  
975 in Three Dimensions: Use of Cylindrical Optics to Encode Particle Position. *Biophys. J.*  
976 67:1291–1300.
- 977 Karnkowska A, Treitli SC, Brzoň O, Novák L, Vacek V, Soukal P, Barlow LD, Herman EK,  
978 Pipaliya S V, Pánek T, et al. 2019. The Oxymonad Genome Displays Canonical Eukaryotic  
979 Complexity in the Absence of a Mitochondrion. *Mol. Biol. Evol.*
- 980 Karnkowska A, Vacek V, Zubáčová Z, Treitli SC, Petrželková R, Eme L, Novák L, Žárský V,  
981 Barlow LD, Herman EK, et al. 2016. A Eukaryote without a Mitochondrial Organelle. *Curr.*  
982 *Biol.* [Internet]:1–11. Available from:  
983 <http://www.sciencedirect.com/science/article/pii/S0960982216302639>
- 984 King N, Westbrook MJ, Young SL, Kuo A, Abedin M, Chapman J, Fairclough S, Hellsten U,  
985 Isogai Y, Letunic I, et al. 2008. The genome of the choanoflagellate *Monosiga brevicollis*

- 986 and the origin of metazoans. *Nature* 451:783–788.
- 987 Kirchhausen T, Owen D, Harrison SC. 2014. Molecular Structure, Function, and Dynamics of  
988 Clathrin-Mediated Membrane Traffic. *Perspect. Biol.* 6.
- 989 Kizilyaprak C, Daraspe J, Humbel BM. 2014. Focused ion beam scanning electron microscopy  
990 in biology. *J. Microsc.* 254:109–114.
- 991 Klar TA, Jakobs S, Dyba M, Egnér A, Hell SW. 2000. Fluorescence microscopy with diffraction  
992 resolution barrier broken by stimulated emission. *Proc. Natl. Acad. Sci. U. S. A.* 97:8206–  
993 8210.
- 994 Kolisko M, Cepicka I, Hampl V, Leigh J, Roger AJ, Kulda J, Simpson AGB, Flegr J. 2008a.  
995 Molecular phylogeny of diplomonads and enteromonads based on SSU rRNA, alpha-  
996 tubulin and HSP90 genes: Implications for the evolutionary history of the double  
997 karyomastigont of diplomonads. *BMC Evol. Biol.* 8:1–14.
- 998 Kolisko M, Cepicka I, Hampl V, Leigh J, Roger AJ, Kulda J, Simpson AGB, Flegr J. 2008b.  
999 Molecular phylogeny of diplomonads and enteromonads based on SSU rRNA, alpha-  
1000 tubulin and HSP90 genes: Implications for the evolutionary history of the double  
1001 karyomastigont of diplomonads. *BMC Evol. Biol.* 8:1–14.
- 1002 Konrad C, Spycher C, Hehl AB. 2010. Selective condensation drives partitioning and sequential  
1003 secretion of cyst wall proteins in differentiating *Giardia lamblia*. *PLoS Pathog.* 6:e1000835.
- 1004 Kotloff KL, Nataro JP, Blackwelder WC, Nasrin D, Farag TH, Panchalingam S, Wu Y, Sow SO,  
1005 Sur D, Breiman RF, et al. 2013. Burden and aetiology of diarrhoeal disease in infants and  
1006 young children in developing countries (the Global Enteric Multicenter Study, GEMS): A  
1007 prospective, case-control study. *Lancet* 382:209–222.
- 1008 Kufareva I, Abagyan R. 2012. Methods of protein structure comparison. *Methods Mol. Biol.*  
1009 857:231–257.
- 1010 Lanata CF, Fischer-Walker CL, Olascoaga AC, Torres CX, Aryee MJ, Black RE, UNICEF for  
1011 the CHERG of the WHO and. 2013. Global Causes of Diarrheal Disease Mortality in  
1012 Children <5 Years of Age: A Systematic Review. Sestak K, editor. *PLoS One* [Internet]  
1013 8:e72788. Available from: <https://dx.plos.org/10.1371/journal.pone.0072788>
- 1014 Lanfredi-Rangel a, Attias M, de Carvalho TM, Kattenbach WM, De Souza W. 1998. The  
1015 peripheral vesicles of trophozoites of the primitive protozoan *Giardia lamblia* may  
1016 correspond to early and late endosomes and to lysosomes. *J. Struct. Biol.* 123:225–235.
- 1017 Lax G, Eglit Y, Eme L, Bertrand EM, Roger AJ, Simpson AGB. 2018. Hemimastigophora is a  
1018 novel supra-kingdom-level lineage of eukaryotes. *Nature* [Internet] 564:410–414. Available  
1019 from: <http://www.nature.com/articles/s41586-018-0708-8>

- 1020 Lealda N, Silva C, Elias CA. 1986. Tritrichomonas foetus: Ultrastructure of Endocytosis and  
1021 Cytochemistry. *Exp. Parasitol.* 62:405–415.
- 1022 Leger MM, Kolisko M, Kamikawa R, Stairs CW, Kume K, Čepička I, Silberman JD, Andersson  
1023 JO, Xu F, Yabuki A, et al. 2017. Organelles that illuminate the origins of Trichomonas  
1024 hydrogenosomes and Giardia mitosomes. *Nat. Ecol. Evol.* 1.
- 1025 Letunic I, Bork P. 2017. 20 years of the SMART protein domain annotation resource. *Nucleic*  
1026 *Acids Res.* [Internet] 46:493–496. Available from:  
1027 [http://academic.oup.com/nar/article/doi/10.1093/nar/gkx922/4429069/20-years-of-the-](http://academic.oup.com/nar/article/doi/10.1093/nar/gkx922/4429069/20-years-of-the-SMART-protein-domain-annotation)  
1028 SMART-protein-domain-annotation
- 1029 Link F, Borges AR, Jones NG, Engstler M. 2021. To the Surface and Back: Exo- and Endocytic  
1030 Pathways in Trypanosoma brucei. *Front. Cell Dev. Biol.* 9:1–15.
- 1031 Lu S, Wang J, Chitsaz F, Derbyshire MK, Geer RC, Gonzales NR, Gwadz M, Hurwitz DI,  
1032 Marchler GH, Song JS, et al. 2020. CDD/SPARCLE: The conserved domain database in  
1033 2020. *Nucleic Acids Res.* 48:D265–D268.
- 1034 Lujan HD, Marotta A, Mowatt MR, Sciaky N, Lippincott-Schwartz J, Nash TE. 1995.  
1035 Developmental induction of Golgi structure and function in the primitive eukaryote Giardia  
1036 lamblia. *J. Biol. Chem.* 270:4612–4618.
- 1037 Manna PT, Obado SO, Boehm C, Gadelha C, Sali A, Chait BT, Rout MP, Field MC. 2017.  
1038 Lineage-specific proteins essential for endocytosis in trypanosomes. *J. Cell Sci.* [Internet]  
1039 130:1379–1392. Available from: <http://jcs.biologists.org/lookup/doi/10.1242/jcs.191478>
- 1040 Marti M, Li Y, Schraner EM, Wild P, Kohler P, Hehl AB. 2003. The Secretory Apparatus of an  
1041 Ancient Eukaryote: Protein Sorting to Separate Export Pathways Occurs Before Formation  
1042 of Transient Golgi-like Compartments. *Mol. Biol. Cell* 14:1433–1447.
- 1043 Marti M, Regös A, Li Y, Schraner EM, Wild P, Müller N, Knopf LG, Hehl AB. 2003. An  
1044 Ancestral Secretory Apparatus in the Protozoan Parasite Giardia intestinalis. *J. Biol.*  
1045 *Chem.* 278:24837–24848.
- 1046 Mateos JM, Guhl B, Doehner J, Barmettler G, Kaech A, Ziegler U. 2016. Topographic contrast  
1047 of ultrathin cryo-sections for correlative super-resolution light and electron microscopy. *Sci.*  
1048 *Rep.* [Internet] 6:34062. Available from: <http://www.nature.com/articles/srep34062>
- 1049 McCaffery JM, Faubert GM, Gillin FD. 1994. Traffic of a Trophozoite Variant Surface Protein  
1050 and a Major Cyst Wall Epitope during Growth, Encystation, and Antigenic Switching. *Exp.*  
1051 *Parasitol.* 79:236–249.
- 1052 McCaffery JM, Gillin FD. 1994. Giardia lamblia: Ultrastructural basis of protein transport during  
1053 growth and encystation. *Exp. Parasitol.* 79:220–235.

- 1054 Midlej V, Pereira-Neves A, Kist LW, Bogo MR, Benchimol M. 2011. Ultrastructural features of  
1055 *Tritrichomonas mobilensis* and comparison with *Tritrichomonas foetus*. *Vet. Parasitol.*  
1056 [Internet] 182:171–180. Available from: <http://dx.doi.org/10.1016/j.vetpar.2011.05.015>
- 1057 Mistry J, Chuguransky S, Williams L, Qureshi M, Salazar GA, Sonnhammer ELL, Tosatto SCE,  
1058 Paladin L, Raj S, Richardson LJ, et al. 2021. Pfam: The protein families database in 2021.  
1059 *Nucleic Acids Res.* 49:D412–D419.
- 1060 Mitchell AL, Attwood TK, Babbitt PC, Blum M, Bork P, Bridge A, Brown SD, Chang HY, El-  
1061 Gebali S, Fraser MI, et al. 2019. InterPro in 2019: Improving coverage, classification and  
1062 access to protein sequence annotations. *Nucleic Acids Res.* 47:D351–D360.
- 1063 Morf L, Spycher C, Rehrauer H, Fournier CA, Morrison HG, Hehl AB. 2010. The Transcriptional  
1064 Response to Encystation Stimuli in *Giardia lamblia* Is Restricted to a Small Set of Genes.  
1065 *Eukaryot. Cell* 9:1566–1576.
- 1066 Morgan GW, Allen CL, Jeffries TR, Hollinshead M, Field MC. 2001. Developmental and  
1067 morphological regulation of clathrin-mediated endocytosis in *Trypanosoma brucei*. *J. Cell*  
1068 *Sci.* 114:2605–2615.
- 1069 Naslavsky N, Caplan S. 2018. The enigmatic endosome - Sorting the ins and outs of endocytic  
1070 trafficking. *J. Cell Sci.* 131.
- 1071 Olivier N, Keller D, Rajan VS, Gönczy P, Manley S. 2013. Simple buffers for 3D STORM  
1072 microscopy. *Biomed. Opt. Express* [Internet] 4:885. Available from:  
1073 <https://www.osapublishing.org/boe/abstract.cfm?uri=boe-4-6-885>
- 1074 Ovesný M, Křížek P, Borkovec J, Švindrych Z, Hagen GM. 2014. ThunderSTORM: A  
1075 comprehensive ImageJ plug-in for PALM and STORM data analysis and super-resolution  
1076 imaging. *Bioinformatics* 30:2389–2390.
- 1077 Paull GC, Matthews RA. 2001. Spironucleus vortens, a possible cause of hole-in-the-head  
1078 disease in cichlids. *Dis. Aquat. Organ.* 45:197–202.
- 1079 Perez-Riverol Y, Csordas A, Bai J, Bernal-Llinares M, Hewapathirana S, Kundu DJ, Inuganti A,  
1080 Griss J, Mayer G, Eisenacher M, et al. 2019. The PRIDE database and related tools and  
1081 resources in 2019: Improving support for quantification data. *Nucleic Acids Res.* 47:D442–  
1082 D450.
- 1083 Pipaliya S V., Santos R, Salas-Leiva D, Balmer EA, Wirdnam CD, Roger AJ, Hehl AB, Faso C,  
1084 Dacks JB. 2021. Unexpected organellar locations of ESCRT machinery in *Giardia*  
1085 *intestinalis* and complex evolutionary dynamics spanning the transition to parasitism in the  
1086 lineage Fornicata. *BMC Biol.* 19:1–23.
- 1087 Poteryaev D, Datta S, Ackema K, Zerial M, Spang A. 2010. Identification of the switch in early-



- 1088 to-late endosome transition. *Cell* 141:497–508.
- 1089 Poulin R, Randhawa HS. 2015. Evolution of parasitism along convergent lines: From ecology to  
1090 genomics. *Parasitology* 142:S6–S15.
- 1091 Radulescu AE, Siddhanta A, Shields D. 2007. A Role for Clathrin in Reassembly of the Golgi  
1092 Apparatus. *Mol. Biol. Cell* 18:94–105.
- 1093 Rapoport I, Boll W, Yu A, Bocking T, Kirchhausen T. 2008. A Motif in the Clathrin Heavy Chain  
1094 Required for the Hsc70/Auxilin Uncoating Reaction. *Mol. Biol. Cell* 19:3250–3263.
- 1095 Richardson E, Dacks JB. 2022. Distribution of Membrane Trafficking System Components  
1096 Across Ciliate Diversity Highlights Heterogenous Organelle-Associated Machinery. *Traffic*.
- 1097 Rivero MR, Miras SL, Quiroga R, Rópolo AS, Touz MC. 2011. Giardia lamblia low-density  
1098 lipoprotein receptor-related protein is involved in selective lipoprotein endocytosis and  
1099 parasite replication. *Mol. Microbiol.* 79:1204–1219.
- 1100 Robinson MS. 2015. Forty Years of Clathrin-coated Vesicles. *Traffic* 16:1210–1238.
- 1101 Rosa IDA, Caruso MB, Rodrigues SP, Geraldo RB, Kist LW, Bogo MR, Gonzaga L,  
1102 Vasconcelos ATR DE, Morgado-Díaz JA, Zingali RB, et al. 2014. New insights on the Golgi  
1103 complex of *Tritrichomonas foetus*. *Parasitology* 141:241–253.
- 1104 Salas-Leiva DE, Tromer EC, Curtis BA, Jerlström-Hultqvist J, Kolisko M, Yi Z, Salas-Leiva JS,  
1105 Gallot-Lavallée L, Williams SK, Kops GJPL, et al. 2021. Genomic analysis finds no  
1106 evidence of canonical eukaryotic DNA processing complexes in a free-living protist. *Nat.*  
1107 *Commun.* 12:1–13.
- 1108 Schindelin J, Arganda-Carreras I, Frise E, Kaynig V, Longair M, Pietzsch T, Preibisch S,  
1109 Rueden C, Saalfeld S, Schmid B, et al. 2012. Fiji: an open-source platform for biological-  
1110 image analysis. *Nat. Methods* [Internet] 9:676–682. Available from:  
1111 <http://www.nature.com/doi/10.1038/nmeth.2019>
- 1112 Schlacht A, Herman EK, Klute MJ, Field MC, Dacks JB. 2014. Missing pieces of an ancient  
1113 puzzle: Evolution of the eukaryotic membrane-trafficking system. *Cold Spring Harb.*  
1114 *Perspect. Biol.* 6.
- 1115 Soltys BJ, Falah M, Gupta RS. 1996. Identification of endoplasmic reticulum in the primitive  
1116 eukaryote *Giardia lamblia* using cryoelectron microscopy and antibody to BiP. *J. Cell Sci.*  
1117 109:1909–1917.
- 1118 Sommer C, Gerlich DW. 2013. Machine learning in cell biology – teaching computers to  
1119 recognize phenotypes. *J. Cell Sci.* 126, 126:5529–5539.
- 1120 Sommer C, Straehle C, Kothe U, Hamprecht FA. 2011. Ilastik: Interactive learning and  
1121 segmentation toolkit. *Proc. - Int. Symp. Biomed. Imaging*:230–233.

- 1122 Stefanic S, Morf L, Kulangara C, Regös A, Sonda S, Schraner E, Spycher C, Wild P, Hehl AB.  
1123 2009. Neogenesis and maturation of transient Golgi-like cisternae in a simple eukaryote. *J.*  
1124 *Cell Sci.* 122:2846–2856.
- 1125 Stefanic S, Palm D, Svärd SG, Hehl AB. 2006. Organelle Proteomics Reveals Cargo Maturation  
1126 Mechanisms Associated with Golgi-like Encystation Vesicles in the Early-diverged  
1127 Protozoan *Giardia lamblia* \*. *J. Biol. Chem.* 281:7595–7604.
- 1128 Sterud E, Poynton S. 2002. *Spironucleus vortens* (Diplomonadida) in the Ide, *Leuciscus idus*  
1129 (L.) (Cyprinidae): a Warm Water Hexamitid Flagellate Found in Northern Europe. *J.*  
1130 *Eukaryot. Microbiol.* 49.
- 1131 Suga H, Chen Z, De Mendoza A, Sebé-Pedrós A, Brown MW, Kramer E, Carr M, Kerner P,  
1132 Vervoort M, Sánchez-Pons N, et al. 2013. The *Capsaspora* genome reveals a complex  
1133 unicellular prehistory of animals. *Nat. Commun.* 4:1–9.
- 1134 Suresh B, Saminathan A, Chakraborty K, Cui C, Krishnan Y. 2020. Tubular lysosomes harbor  
1135 active ion gradients and poise macrophages for phagocytosis. *PNAS* [Internet]  
1136 18:2020.12.05.413229. Available from: <https://doi.org/10.1101/2020.12.05.413229>
- 1137 Tanifuji G, Takabayashi S, Kume K, Takagi M, Nakayama T, Kamikawa R, Inagaki Y,  
1138 Hashimoto T. 2018. The draft genome of *Kipferlia bialata* reveals reductive genome  
1139 evolution in fornicate parasites. *PLoS One*.
- 1140 Titze B, Genoud C. 2016. Volume scanning electron microscopy for imaging biological  
1141 ultrastructure. *Biol. Cell* 108:307–323.
- 1142 Touz M, Feliziani C, Rópolo A. 2018. Membrane-Associated Proteins in *Giardia lamblia*. *Genes*  
1143 (*Basel*). [Internet] 9:404. Available from: <http://www.mdpi.com/2073-4425/9/8/404>
- 1144 Tovar J, León-Avila G, Sánchez LB, Sutak R, Tachezy J, Van Der Giezen M, Hernández M,  
1145 Müller M, Lucocq JM. 2003. Mitochondrial remnant organelles of *Giardia* function in iron-  
1146 sulphur protein maturation. *Nature* 426:172–176.
- 1147 Traub LM. 2011. Regarding the amazing choreography of clathrin coats. *PLoS Biol.* 9:3–7.
- 1148 Tůmová P, Nohýnková E, Klingl A, Wanner G. 2020. A rapid workflow for the characterization of  
1149 small numbers of unicellular eukaryotes by using correlative light and electron microscopy.  
1150 *J. Microbiol. Methods* 172.
- 1151 Tunyasuvunakool K, Adler J, Wu Z, Green T, Zielinski M, Židek A, Bridgland A, Cowie A, Meyer  
1152 C, Laydon A, et al. 2021. Highly accurate protein structure prediction for the human  
1153 proteome. *Nature* [Internet] 596:590–596. Available from: [http://dx.doi.org/10.1038/s41586-](http://dx.doi.org/10.1038/s41586-021-03828-1)  
1154 [021-03828-1](http://dx.doi.org/10.1038/s41586-021-03828-1)
- 1155 Verner Z, Žárský V, Le T, Narayanasamy RK, Rada P, Rozbeský D, Makki A, Beliřová D, Hrdý

- 1156 I, Vancová M, et al. 2021. Anaerobic peroxisomes in *Entamoeba histolytica* metabolize  
1157 myo-inositol.
- 1158 Wei D, Jacobs S, Modla S, Zhang S, Young CL, Cirino R, Caplan J, Czymmek K. 2012. High-  
1159 resolution three-dimensional reconstruction of a whole yeast cell using focused-ion beam  
1160 scanning electron microscopy. *Biotechniques* 53:41–48.
- 1161 Wilbur JD, Hwang PK, Ybe JA, Lane M, Sellers BD, Jacobson MP, Fletterick RJ, Brodsky FM.  
1162 2010. Conformation switching of clathrin light chain regulates clathrin lattice assembly.  
1163 *Dev. Cell* [Internet] 18:841–848. Available from:  
1164 <http://dx.doi.org/10.1016/j.devcel.2010.04.007>
- 1165 Willig KI, Rizzoli SO, Westphal V, Jahn R, Hell SW. 2006. STED microscopy reveals that  
1166 synaptotagmin remains clustered after synaptic vesicle exocytosis. *Nature* 440:935–939.
- 1167 Woo YH, Ansari H, Otto TD, Linger CMK, Olisko MK, Michálek J, Saxena A, Shanmugam D,  
1168 Tayyrov A, Veluchamy A, et al. 2015. Chromerid genomes reveal the evolutionary path  
1169 from photosynthetic algae to obligate intracellular parasites. *Elife* 4:1–41.
- 1170 Xu F, Jerlström-Hultqvist J, Einarsson E, Ástvaldsson Á, Svärd SG, Andersson JO. 2014. The  
1171 Genome of *Spironucleus salmonicida* Highlights a Fish Pathogen Adapted to Fluctuating  
1172 Environments. *PLoS Genet.* 10.
- 1173 Xu F, Jerlström-Hultqvist J, Kolisko M, Simpson AGB, Roger AJ, Svärd SG, Andersson JO.  
1174 2016. On the reversibility of parasitism: adaptation to a free-living lifestyle via gene  
1175 acquisitions in the diplomonad *Trepomonas* sp. PC1. *BMC Biol.* 14:1–15.
- 1176 Yubuki N, Huang SSCC, Leander BS. 2016. Comparative Ultrastructure of Fornicate Excavates,  
1177 Including a Novel Free-living Relative of Diplomonads: *Aduccisulcus paluster* gen. et sp.  
1178 nov. *Protist* [Internet] 167:584–596. Available from:  
1179 <http://dx.doi.org/10.1016/j.protis.2016.10.001>
- 1180 Yubuki N, Simpson AGB, Leander BS. 2013. Comprehensive Ultrastructure of *Kipferlia bialata*  
1181 Provides Evidence for Character Evolution within the Fornicata (Excavata). *Protist*  
1182 [Internet] 164:423–439. Available from: <http://dx.doi.org/10.1016/j.protis.2013.02.002>
- 1183 Zhang Y, Skolnick J. 2005. TM-align: A protein structure alignment algorithm based on the TM-  
1184 score. *Nucleic Acids Res.* 33:2302–2309.
- 1185 Zimmermann L, Stephens A, Nam SZ, Rau D, Kübler J, Lozajic M, Gabler F, Söding J, Lupas  
1186 AN, Alva V. 2017. A Completely Reimplemented MPI Bioinformatics Toolkit with a New  
1187 HHpred Server at its Core. *J. Mol. Biol.* [Internet] 430:1–7. Available from:  
1188 <https://doi.org/10.1016/j.jmb.2017.12.007>
- 1189 Zumthor JP, Cernikova L, Rout S, Kaech A, Faso C, Hehl AB. 2016. Static Clathrin Assemblies

1190 at the Peripheral Vacuole Plasma Membrane Interface of the Parasitic Protozoan *Giardia*  
1191 *lamblia*. *PLoS Pathog.* 12:1–33.

1192

## 1193 **FIGURE LEGENDS**

1194

1195 **Figure 1 – Complete scanning of a *Giardia* trophozoite by focused ion beam scanning**

1196 **electron microscopy (FIB-SEM).** (A and D) A complete *G. lamblia* trophozoite was scanned

1197 with an isotropic resolution of 5 nm. The Nucleus (N), the Endoplasmic Reticulum (ER),

1198 cytoskeletal features such as the Ventral disk (VD), Funis (F) and axonemes (Ax) and

1199 mitochondria (m), are observed. Peripheral vesicles (PV) are marked by arrowheads. Smaller,

1200 electron dense vesicles are also documented (asterisks) – small vesicles (SVs). (B) Region of

1201 interest of (A) highlighting PVs of different morphology with arrowheads. (C) Highlight of

1202 mitochondria proximal to ER membrane. (E) Region of interest of (D) highlighting SVs (asterisks).

1203 (F) Full reconstruction of PVs with ilastik and rendering in Imaris reveals the presence of at least

1204 two PV morphologies: spherical (green) and tubular (violet). Box-plot: 403 spherical and 64

1205 tubular PVs were segmented out. Spherical PVs average a volume of  $0.0009243 \pm 0.0003322$

1206  $\mu\text{m}^3$  with a 95% confidence interval between  $[0.0009022; 0.0009022]$   $\mu\text{m}^3$ . Tubular PVs

1207 average a volume of  $0.001067 \pm 0.0003322 \mu\text{m}^3$  with a 95% confidence interval between

1208  $[0.0009843; 0.001150]$   $\mu\text{m}^3$ . (G) Reconstruction of 269 SVs revealed their volumes average

1209  $0.0002525 \pm 9.280 \times 10^{-5} \mu\text{m}^3$  in a 95% confidence interval between  $[0.0002414; 0.0002637]$   $\mu\text{m}^3$

1210 (left box-plot). This equals to an average diameter of  $77.23 \pm 9.666$  nm in a 95% confidence

1211 interval between  $[76.07; 78.40]$  nm. The diameter of spherical PVs averages  $120.1 \pm 9.507$  nm in

1212 a 95% confidence interval between  $[119.2; 121]$  nm (right box-plot). The difference in diameter

1213 between SVs and spherical PVs is statistically significant (\*\*\*\*; p-value < 0.0001, t-student

1214 significance test). Scale bars: (A and D) 2  $\mu\text{m}$ , (B, C and E) 500 nm. ROI: region of interest.

1215

1216 **Figure 2 – Super Resolution imaging of *Giardia lamblia* peripheral vesicles with**

1217 **Stimulated Emission Depletion (STED).** (A) *Giardia* trophozoites loaded with 10kDa Dextran-

1218 AlexaFluor 594 were imaged using Confocal and STED microscopy. Dorsal (upper row) and

1219 ventral (lower row) regions are represented. In contrast to confocal imaging, STED microscopy

1220 allows to separate individual organelles and to visualise different endocytic compartment

1221 morphologies. ROI: region of interest. (B) Organelles segmentation with ilastik distinguishes

1222 three Dextran-labelled PV categories. (C) PV areas were calculated post-segmentation on

1223 maximum projections of the dorsal regions of  $\geq 10$  cells, using ilastik. Spherical PVs (green, N

1224 =1684) have an average area of  $0.0205 \pm 0.0169 \mu\text{m}^2$  in a 95% confidence interval between  
1225 [0.0197;0.0213], ubular PVs (blue, N=835) have an average area of  $0.0453 \pm 0.0278 \mu\text{m}^2$  in a  
1226 95% confidence interval between [0.0435;0.0472]. and polymorphic PVs (magenta, N=400)  
1227 have an average area of  $0.0981 \pm 0.0429 \mu\text{m}^2$  in a 95% confidence interval between  
1228 [0.0939;0.102]. The differences in area are statistically significant (ANOVA; p-value <0.0001).  
1229 Scale bars: (A) 5  $\mu\text{m}$  and 1  $\mu\text{m}$  (ROIs), (B) 5  $\mu\text{m}$ .

1230  
1231 **Figure 3 - Super Resolution imaging of *Giardia lamblia* PVs by Stochastic Object**  
1232 **Reconstruction Microscopy (STORM).** (A) Widefield microscopy-based imaging of a Giardia  
1233 trophozoite loaded with 10kDa Dextran-Alexa Fluor 647. (B) Reconstruction of single molecule  
1234 events using the Fiji plugin Thunderstorm. As with STED imaging, different PV morphologies  
1235 are observed. (C) PVs were segmented with the help of ilastik and volumes were calculated and  
1236 plotted in (D). Spherical PVs (green, N=1989) present an average volume of  $0.00507 \pm 0.00336$   
1237  $\mu\text{m}^3$  with a 95% confidence interval between [0.00492;0.00522]  $\mu\text{m}^3$ , tubular PVs (blue, N=838)  
1238 present an average volume of  $0.0103 \pm 0.00925 \mu\text{m}^3$  in a 95% confidence interval between  
1239 [0.00967, 0.0109]  $\mu\text{m}^3$ . Polymorphic PVs (magenta, N=1494) present an average volume of  
1240  $0.0227 \pm 0.0214 \mu\text{m}^3$  in a 95% confidence interval between [0.0216, 0.0238]  $\mu\text{m}^3$ . The  
1241 differences in area are statistically significant (ANOVA; p-value <0.0001). Based on these and  
1242 previously shown data, the renaming of PVs to Peripheral Endocytic Compartments (PECs), is  
1243 proposed. Scale bars: 5  $\mu\text{m}$  and 1  $\mu\text{m}$  (ROI),.

1244  
1245 **Figure 4 – Uptake of fluorescently-labelled dextran in metamonada and discoba**  
1246 **members: *G. lamblia*, *S. vortens*, *S. salmonicida* and *T. foetus* after 30 minutes.**  
1247 (A) *G. lamblia* cells present endocytic compartments spread on the cell periphery not resolved  
1248 by conventional light microscopy. On the other hand, (B) *S. vortens*, (C) *S. salmonicida* and (D)  
1249 *T. foetus* present vesicular shaped endocytic compartments. Scale bars: 5  $\mu\text{m}$  (full cells) and 1  
1250  $\mu\text{m}$  (ROI).

1251  
1252 **Figure 5 – Super Resolution imaging of *S. vortens* endocytic compartments with STED**  
1253 **and Transmission Electron Microscopy (TEM)** (A) Following incubation with dextran-  
1254 TexasRed for 30 minutes, *S. vortens* display elongated endocytic compartments with an  
1255 average diameter of  $468 \pm 206$  nm in a 95% confidence interval between [421;515] nm (upper  
1256 box-plot). (B) TEM imaging detects several endosome-like vacuoles (V) throughout the cell,

1257 with an average diameter of  $844\pm 335$  nm in a 95% confidence interval between [763;905] nm  
1258 (lower box-plot). Measurements were done manually. The Endoplasmic Reticulum (ER) and a  
1259 nucleus (N) are also highlighted in the images. Scale bars: 5  $\mu$ m (full field of view) and 1  $\mu$ m  
1260 (ROIs).

1261  
1262 **Figure 6 – Super Resolution Imaging of *T. foetus* endocytic compartments with STED and**

1263 **TEM .** (A) 2D-STED analysis of *T. foetus* cells loaded with 10 kDa Dextran-Alexa Fluor 594  
1264 illuminate endosomes with globular structures at an average diameter of  $517\pm 251$  nm in a 95%  
1265 confidence interval between [455;580] nm (upper box-plot). (B) TEM investigation of *T. foetus*  
1266 cells reveals two kinds of endosome-like vesicles. Low electron-density vesicles found both at  
1267 the cell periphery and centre are deemed vacuoles (V) with an average diameter of  $246\pm 100$  nm  
1268 (N=153) in a 95% confidence interval of [230;262] nm. Vesicles of higher electron-density and  
1269 with noticeable content are Digestive Vacuoles (DVs). DVs are larger than vacuoles, with an  
1270 average diameter of  $764\pm 203$  nm (N=50) in a 95% confidence interval of [707;822] nm (lower  
1271 box-plot). Scale bars: 5  $\mu$ m (full field of view) and 1  $\mu$ m (ROIs).

1272  
1273 **Figure 7 – Time course on fluorescent dextran uptake in selected metamonada and**

1274 **discoba specimens: *G. lamblia*, *S. vortens*, *S. salmonicida* and *T. foetus* after 30**  
1275 **minutes.** (A) PV/PECs in *G. lamblia* start acquiring external material right after 5 minutes of  
1276 incubation with dextran. Over 30 minutes of dextran incubation, the endocytic marker does not  
1277 leave PECs. In (B) *S. vortens*, (C) *S. salmonicida* and (D) *T. foetus*, dextran is up taken in small  
1278 vesicles. In *S. vortens* these small vesicles tend to agglomerate at the centre of the cell while in  
1279 *S. salmonicida*, these vesicles seem to stay peripheral. In *T. foetus*, vesicles bearing dextran  
1280 from at the periphery of the cell and also migrate to the interior of the cell. All scale bars: 5  $\mu$ m.

1281  
1282 **Figure 8 – G/CHC and G/CLC foci associate to *Giardia* PECs with different**

1283 **stoichiometries.** (A) An epitope-tagged G/CHC reporter was used to localise foci of G/CHC  
1284 deposition at the cell periphery beneath the PM, by STED microscopy .(B) These foci can be  
1285 clearly resolved with STED microscopy (left graph). (C) The same was done with an epitope-  
1286 tagged G/CLC reporter and (D) foci resolved as in (B) (right graph). (E) Foci were segmented  
1287 with ilastik. Areas were determined and diameters calculated in an automatic procedure  
1288 assuming spherical geometry. G/CHC foci present an average diameter of  $134\pm 36.6$  nm (N =  
1289 4524) in a 95% confidence interval between [132;135] nm. G/CLC foci average a diameter of  
1290  $159\pm 48.8$  nm (N = 984) in a 95% confidence interval between [156;162] nm. G/CLC foci are

1291 larger than G/CHC in significant statistical manner (p-value < 0.0001, t-student test). (F) G/CHC  
1292 foci associate in different stoichiometry to different classes of PECs. Spherical PECs are either  
1293 not associated to clathrin or with just one focus: mean of  $0.488 \pm 0.159$  foci per spherical in a  
1294 95% confidence interval between [0.403;0.573] foci per spherical organelle. Tubular PECs  
1295 associate with one focus of G/CHC: mean of  $1.15 \pm 0.287$  in a 95% confidence interval between  
1296 [0.994;1.3] foci per tubular organelle. Polymorphic PECs associate with 3 or more G/CHC foci  
1297 with an average of  $3.85 \pm 1.14$  in a 95% confidence interval between [3.25;4.46] foci per  
1298 polymorphic organelle. These distributions are statistically significant with a p-value < 0.0001  
1299 (ANOVA analysis).

1300  
1301 **Figure 9 – Homology search for *bona fide* CHC and CLC reveal key importance of CHC**  
1302 **and patchy conservation of CLC.** (A) CHC and CLC homology searches demonstrate the  
1303 conservation of CHC orthologs in all analysed lineages. However, several lineages appeared to  
1304 have lost a readily-detectable *bona fide* CLC including all selected Fornicata, certain  
1305 Chromerids (Woo et al. 2015), some ciliates (Richardson and Dacks 2022) and members of the  
1306 Hemimastigophora. (B) *Ab initio in silico* protein modelling of *G. lamblia* ACLC (formerly  
1307 G/CLC/GI4529), *T. brucei* CLC, *T. foetus* CLC, *M. exilis* CLC, *D. discoideum* and *H. sapiens*  
1308 CLC sequences using AlphaFold, the current standard in *in silico protein* structure modelling.  
1309 TM-align and RMSD values were calculated showing close structure analogy between predicted  
1310 structures (table).

1311  
1312 **Figure 10 –Endosome-like organelle models in *Giardia*, *Spironucleus* and**  
1313 ***Tritrichomonas*, and proposed evolution of CLC.** (A) Simplified cartoons of the endocytic  
1314 and secretory pathway in *Giardia lamblia* (Giardiinae), *Spironucleus* sp. (Hexamitidae) and  
1315 *Tritrichomonas foetus* (Parabasalia). PECs are a hallmark of the *Giardia* lineage, while more  
1316 canonical vesicular endosomes are present in both the *Spironucleus* lineage and Parabasalia.  
1317 (B) Simplified evolutionary model for *bona fide* CLC. The last eukaryotic common ancestor  
1318 possessed a *bona fide* CLC which was lost at the last Fornicata common ancestor. In at least  
1319 two derived lineages, – Giardiinae and *Spironucleus* spp. - *de novo protein* analogue to CLC  
1320 was acquired independently.

1321  
1322 **Supplementary figures**

1323 **Supplementary figure 1 – Rendering of a *G. lamblia* trophozoite scanned with FIB-SEM**  
1324 **reveals the cell's inner ultrastructure.** (A) 3D view of acquired FIB-SEM trophozoite data. (B)

1325 Single slice showing inner cellular structures such as cytoskeleton elements at the median body  
1326 (MB), the ventral disk (VD), the endoplasmic reticulum (ER), mitosomes (m) and peripheral  
1327 vacuoles (PV), highlighted in the region of interest (ROI). (C) Segmentation of different  
1328 categories of the dataset: cell volume ( $138 \mu\text{m}^3$ ), cytoskeleton, endoplasmic reticulum,  
1329 peripheral vacuoles, small vesicles and mitosomes. (D) Mitosome volume (N = 14, box-plot)  
1330 was determined post segmentation at an average volume of  $0.001093 \pm 0.0005698 \mu\text{m}^3$  in a 95%  
1331 confidence interval between  $[0.0007643, 0.001422] \mu\text{m}^3$ .

1332  
1333 **Supplementary figure 2 – Cryo-SEM of freeze-fractured trophozoites reveals varying**  
1334 **vacuolar morphology in *Giardia lamblia*.** (A) Overview of cryo-preserved *Giardia* trophozoites  
1335 subjected to freeze-fracture and SEM imaging. Nuclei (N), Endoplasmic Reticulum (ER), Ventral  
1336 Disk (VD) and peripheral endocytic compartments (PEC) and plasma membrane (PM) are  
1337 clearly identifiable. (B and C) Insets showing different PEC morphology: vesicular (asterisk) and  
1338 tubular (hashtag). Scale bar: (A)  $2 \mu\text{m}$  and (B and C)  $500 \text{ nm}$ .

1339  
1340 **Supplementary figure 3 – TEM investigation of *Giardia lamblia* endocytic and secretory**  
1341 **pathway.** (A) Overview of a trophozoite. Different PEC structures, vesicular and tubular are  
1342 observed, together with small vesicles (SV). The N (nucleus) and ER are also highlighted. (B)  
1343 Close up on tubular PECs (hashtag). (C) Close up on vesicular PECs (asterisk) and SVs  
1344 (arrowhead). Scale bars: (A)  $2 \mu\text{m}$ , (B)  $1 \mu\text{m}$  and (C)  $500 \text{ nm}$ .

1345  
1346 **Supplementary figure 4 – TEM investigation of *S. salmonicida* endocytic and secretory**  
1347 **pathway.** (A) *S. salmonicida* presents vacuolar formations close to the plasma membrane. Cells  
1348 also present a prominent endoplasmic reticulum (ER; blue-framed inset). (B) Highlight of  
1349 vacuolar formations (V) and ER. (C) Second cell displaying an abundance of PV close to its  
1350 plasma membrane. (D) Highlight of vacuoles (V) and the prominent ER that connects to the  
1351 plasma membrane (asterisk). (E) *S. salmonicida* PVs average a diameter of  $205 \pm 62.6 \text{ nm}$   
1352 (N=114) in a 95% confidence interval of [193;217]. (F) *S. vortens* peripheral vacuoles are larger  
1353 than *S. salmonicida* vacuoles in a statistically significant manner (p-value < 0.0001). Diameters  
1354 were manually determined. Scale bars: (A and C)  $2 \mu\text{m}$  and (B and D)  $500 \text{ nm}$ .

1355  
1356 **Supplementary figure 5 – TEM investigation of *T. foetus* Golgi vesicles.** (A) More than  
1357 one Golgi apparatus (G) can be found per cell. These organelles resemble canonical stacked



1358 Golgi releasing small coated vesicles. (B) These vesicles average a diameter of  $58.4 \pm 13.1$  nm  
1359 (N=128) in a 95% confidence interval of [56.1;60.7] nm. Scale bar: (A) 500 nm.

1360  
1361 **Supplementary figure 6 – Pan-Eukaryotic prediction of clathrin heavy chain protein**  
1362 **domains.** Pfam analysis of predicted protein domains for several clathrin heavy chain proteins  
1363 sequences from the following species: *Giardia lamblia*, *Spironucleus vortens*, *Spironucleus*  
1364 *salmonicida*, *Trepomonas sp.*, *Hexamita inflata*, *Dysnectes brevis*, *Kipferlia bialata*,  
1365 *Carpediomonas membranifera*, *Aduncisulcus paluster*, *Chilomastix cuspidata*, *Trypanosoma*  
1366 *brucei*, *Naegleria gruberi*, *Tritrichomonas foetus*, *Monocercomonoides exilis*, *Tetrahymena*  
1367 *thermophila*, *Hemimastix kukwestjiik*, *Chlamydomonas reinhardtii*, *Dyctiostilium discoideum*,  
1368 *Saccharomyces cerevisiae*, *Caenorhabditis elegans*, *Homo sapiens*, *Salpingoeca rosetta*,  
1369 *Capsospora owczarzaki* and *Monosiga brevicollis*. A general decrease in domain complexity is  
1370 observed in excavates compared with higher eukaryotes. CLOs: Carpediomonas-like  
1371 organisms. Diplom: Diplomonada.

1372  
1373 **Supplementary figure 7 – The QLMLT motif is exclusive to Holozoa.** Alignment of the C-  
1374 terminii of CHC sequences from selected Opisthokonta, Archaeplastida, Amoebozoa and SAR  
1375 species highlights the present of the QLMLT uncoating motif only in Holozoa supergroup. The  
1376 positioning of the QLMLT is highlighted in blue.

1377  
1378 **Supplemental figure 8 – Calculation of *Giardia* ACLC synonymous vs non- synonymous**  
1379 **mutation ratio ( $\omega = ks/kn$ ).** (A) Phylogenetic tree resulting of maximum likelihood analysis of  
1380 the *Giardia* ACLC sequences. Each node is represented by a number. (B) Overall  $\omega < 1$   
1381 indicating there is no selective pressure on *Giardia* ACLC.

1382  
1383 **Supplemental figure 9 – *S. salmonicida* CHC (SsCHC) is distributed in the cell cytosol in**  
1384 **foci and does interact with a structural form of CLC.** (A) SsCHC was tagged C-terminally  
1385 with three HA tags. It is found throughout the cell cytosol. Signal is observed in 88% of the  
1386 analyzed cells (N = 171). (B) High resolution imaging of SsCHC using confocal imaging reveals  
1387 CHC foci. (C) Distribution of the 171 proteins found in higher abundance in the SsCHC native  
1388 co-IP dataset. (D) Native co-IP of tagged SsCHC reporter reveals interaction with several  
1389 members of the endocytic pathway such as dynamin or beta-adaptin and calmodulin. (E) *Ab*  
1390 *initio in silico* protein modelling with AlphaFold of Ss11905, *GI*ACLIC, *Tb*CLC and *Hs*CLC. TM-  
1391 align and RMSD scores for predicted structures of *Giardia* ACLC, *Trypanosoma brucei* CLC and

1392 Ss11905 with respect to *Homo sapiens* CLC show overall structural conservation with respect to  
1393 a *bona fide* CLC. Scale bars: (A) 20  $\mu\text{m}$ . (B) 5  $\mu\text{m}$ .

1394

1395 **Supplementary figure 10 – *Trepomonas* sp. PC1 also harbours a putative CLC analogue.**

1396 *Ab initio* protein modelling of TPC1\_16039, orthologous to Ss11905 in combination with  
1397 Ss11905, *GI*CLC, *Tb*CLC and *Hs*CLC. RMSD and TM-align cores show overall structural  
1398 conservation with respect to a *bona fide* CLC.

1399

1400 **Supplementary Videos**

1401 **Supplementary Video 1** – Three-dimensional rendering of endocytic compartments in *G.*  
1402 *lamblia* derived from FIB-SEM sectioning and imaging. Scale bar 1  $\mu\text{m}$ .

1403

1404 **Supplementary Video 2** – Comparison between confocal and STED imaging of *Giardia* PECs.  
1405 Scale bar: 3  $\mu\text{m}$ .

1406

1407 **Supplementary Video 3** – Tri-dimensional reconstruction of PV/PECs from STORM data.

1408

1409 **Supplementary Video 4** – Tri-dimensional confocal imaging of *S. vortens* with Dextran-Texas  
1410 Red. Both peripheral and near-nuclear endosome-like vacuoles are observed.

1411

1412 **Supplementary Video 5** - Tri-dimensional STED imaging of *S. vortens* with Dextran Alexa  
1413 Fluor 594 reveals endosome-like vacuoles in greater detail.

1414

1415 **Supplementary Video 6** - Tri-dimensional STED imaging of *T. foetus* with Dextran Alexa Fluor  
1416 594 reveals endosome-like vacuoles in greater detail.

1417

1418 **Supplemental Video 7** – Tri-dimensional high resolution confocal imaging and representation  
1419 of SsCHC-3xHA foci in the cell cytoplasm.

1420

1421 **Supplementary Tables**

1422 **Supplementary Table 1-** PECs volume comparison as calculated in FIB-SEM and STORM  
1423 experiments

1424

1425 **Supplementary Tables 2-9 (one file)**

- 1426 Supplementary Table 2 - Queries used for CHC HHM profile building
- 1427 Supplementary Table 3 - Results from Pan-Eukaryotic search of CHC homologues in available
- 1428 Proteomes
- 1429 Supplementary Table 5 - Queries used for CLC HHM profile building
- 1430 Supplementary Table 6 - Results for GICLC search in available Giardia genomes
- 1431 Supplementary Table 7 - Results for bona fide CLC present in other genomes/transcriptomes
- 1432 Supplementary Table 8 - Comparison of GICLC with bona fide CLC
- 1433 Supplementary Table 9 - Ten best hits from HHPred
- 1434
- 1435 **Supplementary Table 10** - Search for domains from Clathrin heavy chain super family repeats
- 1436
- 1437 **Supplementary Table 11** - Modelled sequences for CLC and alike
- 1438
- 1439 **Supplementary Table 12** - SsCHC co-IP results
- 1440

Figure 1

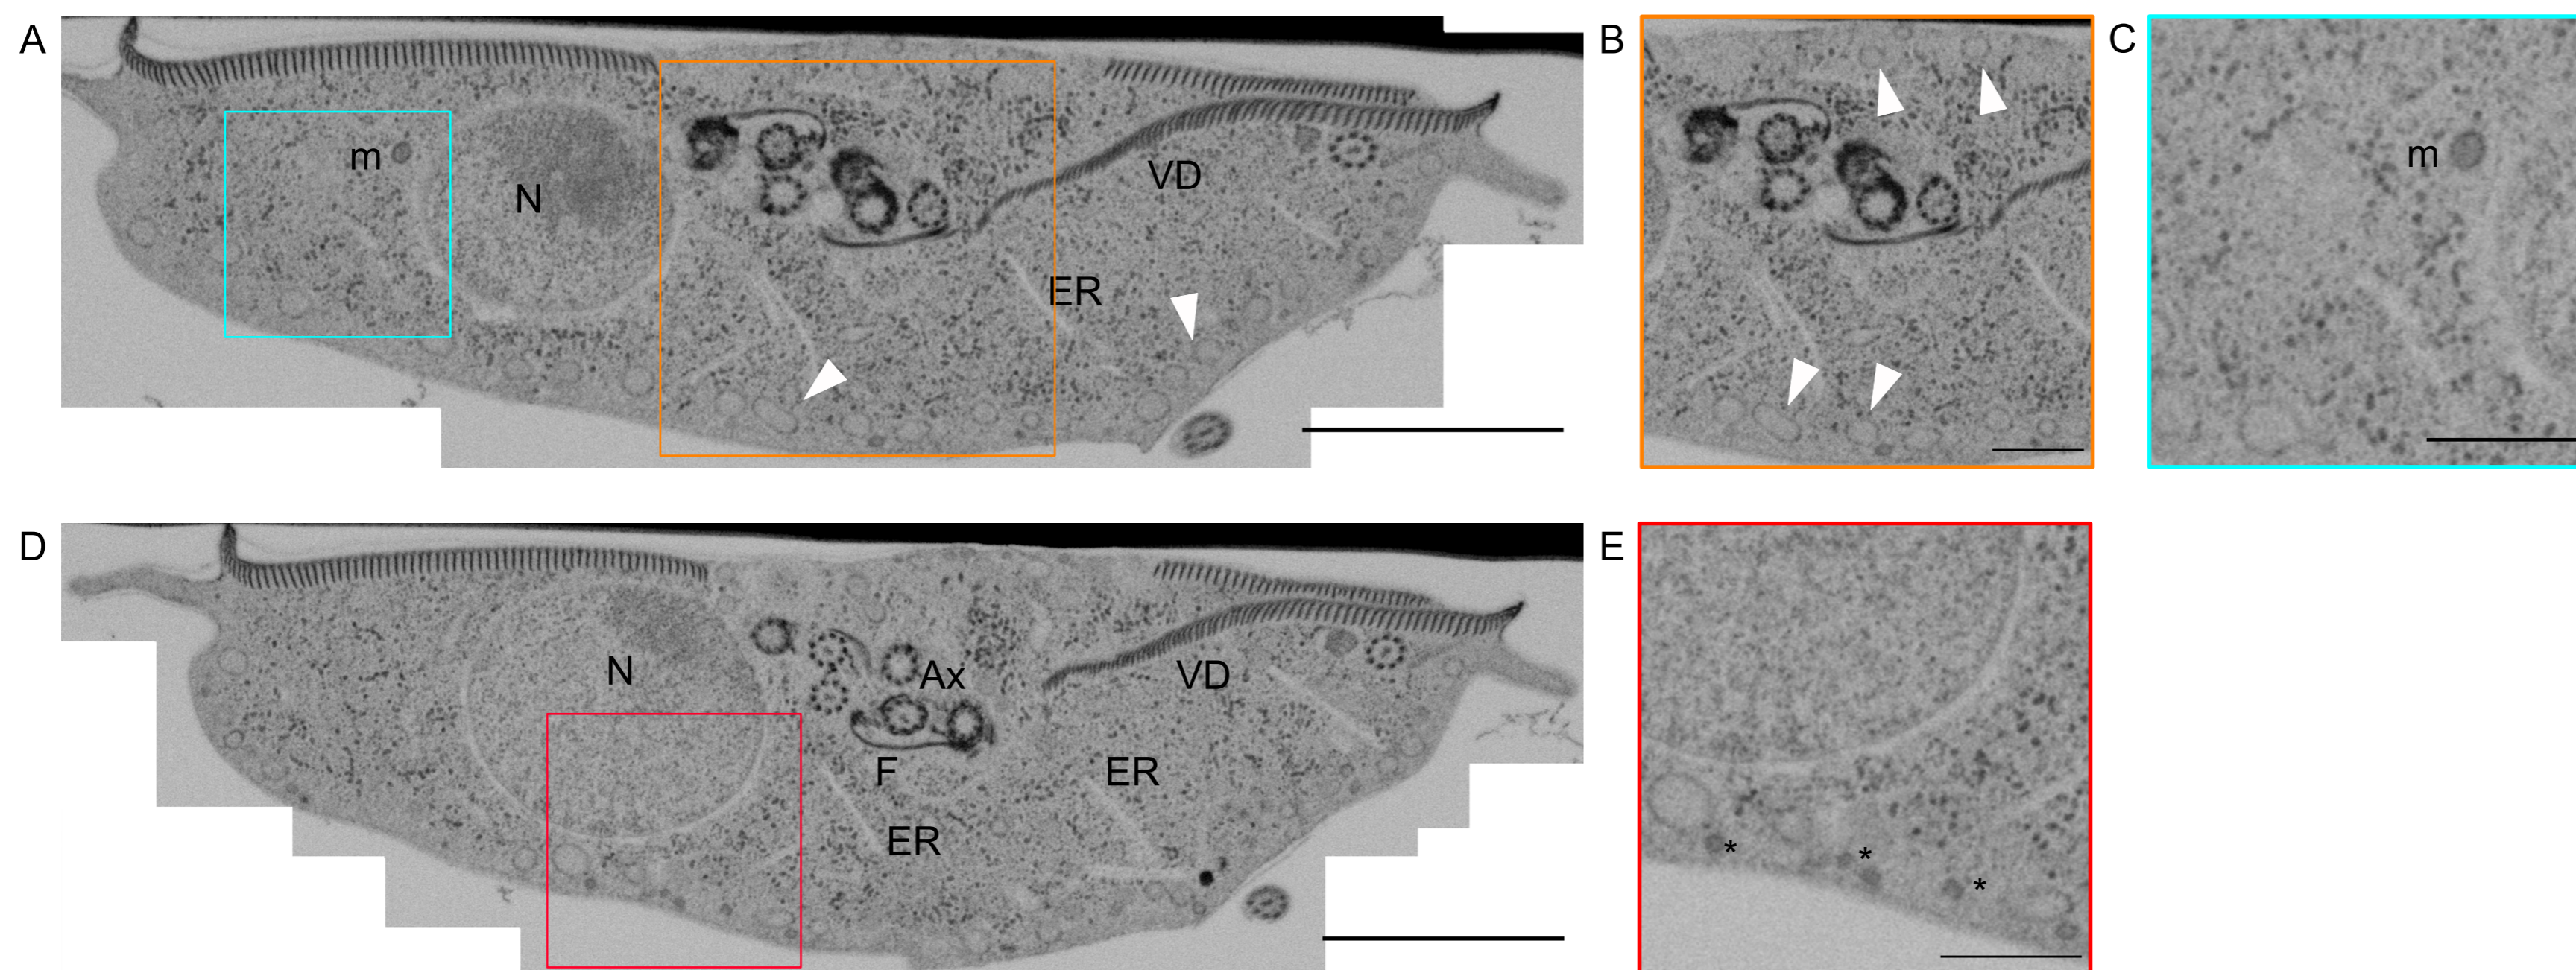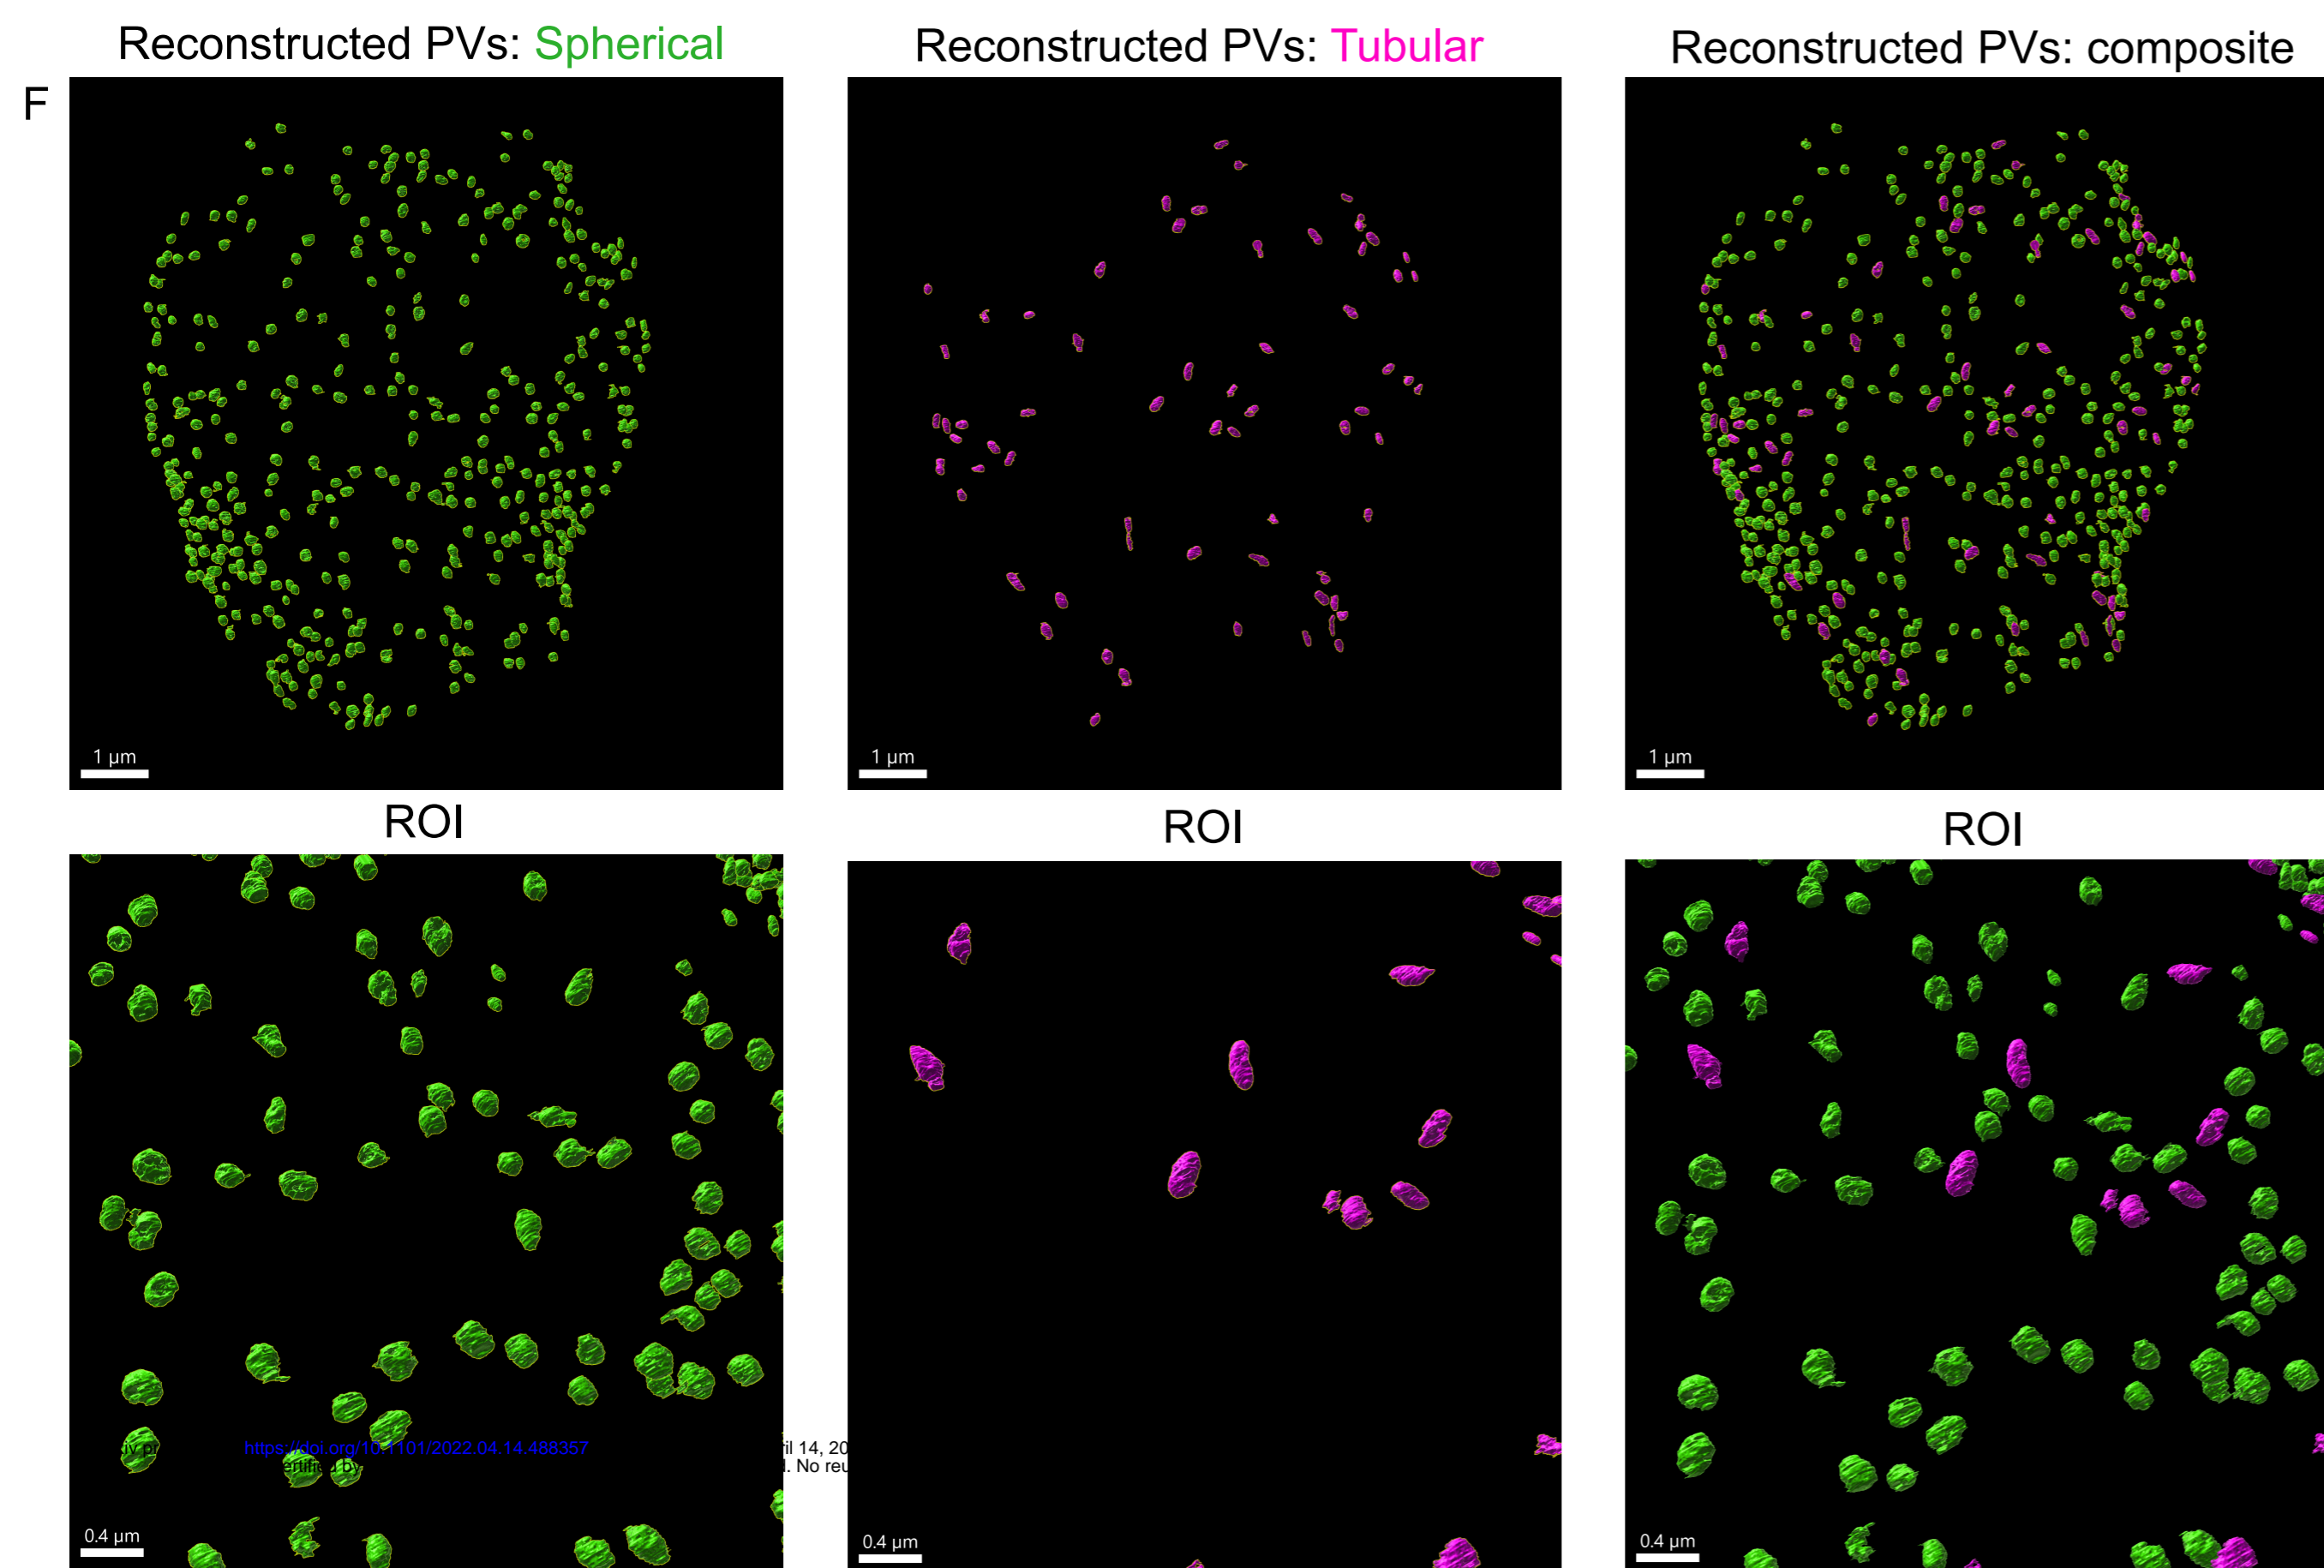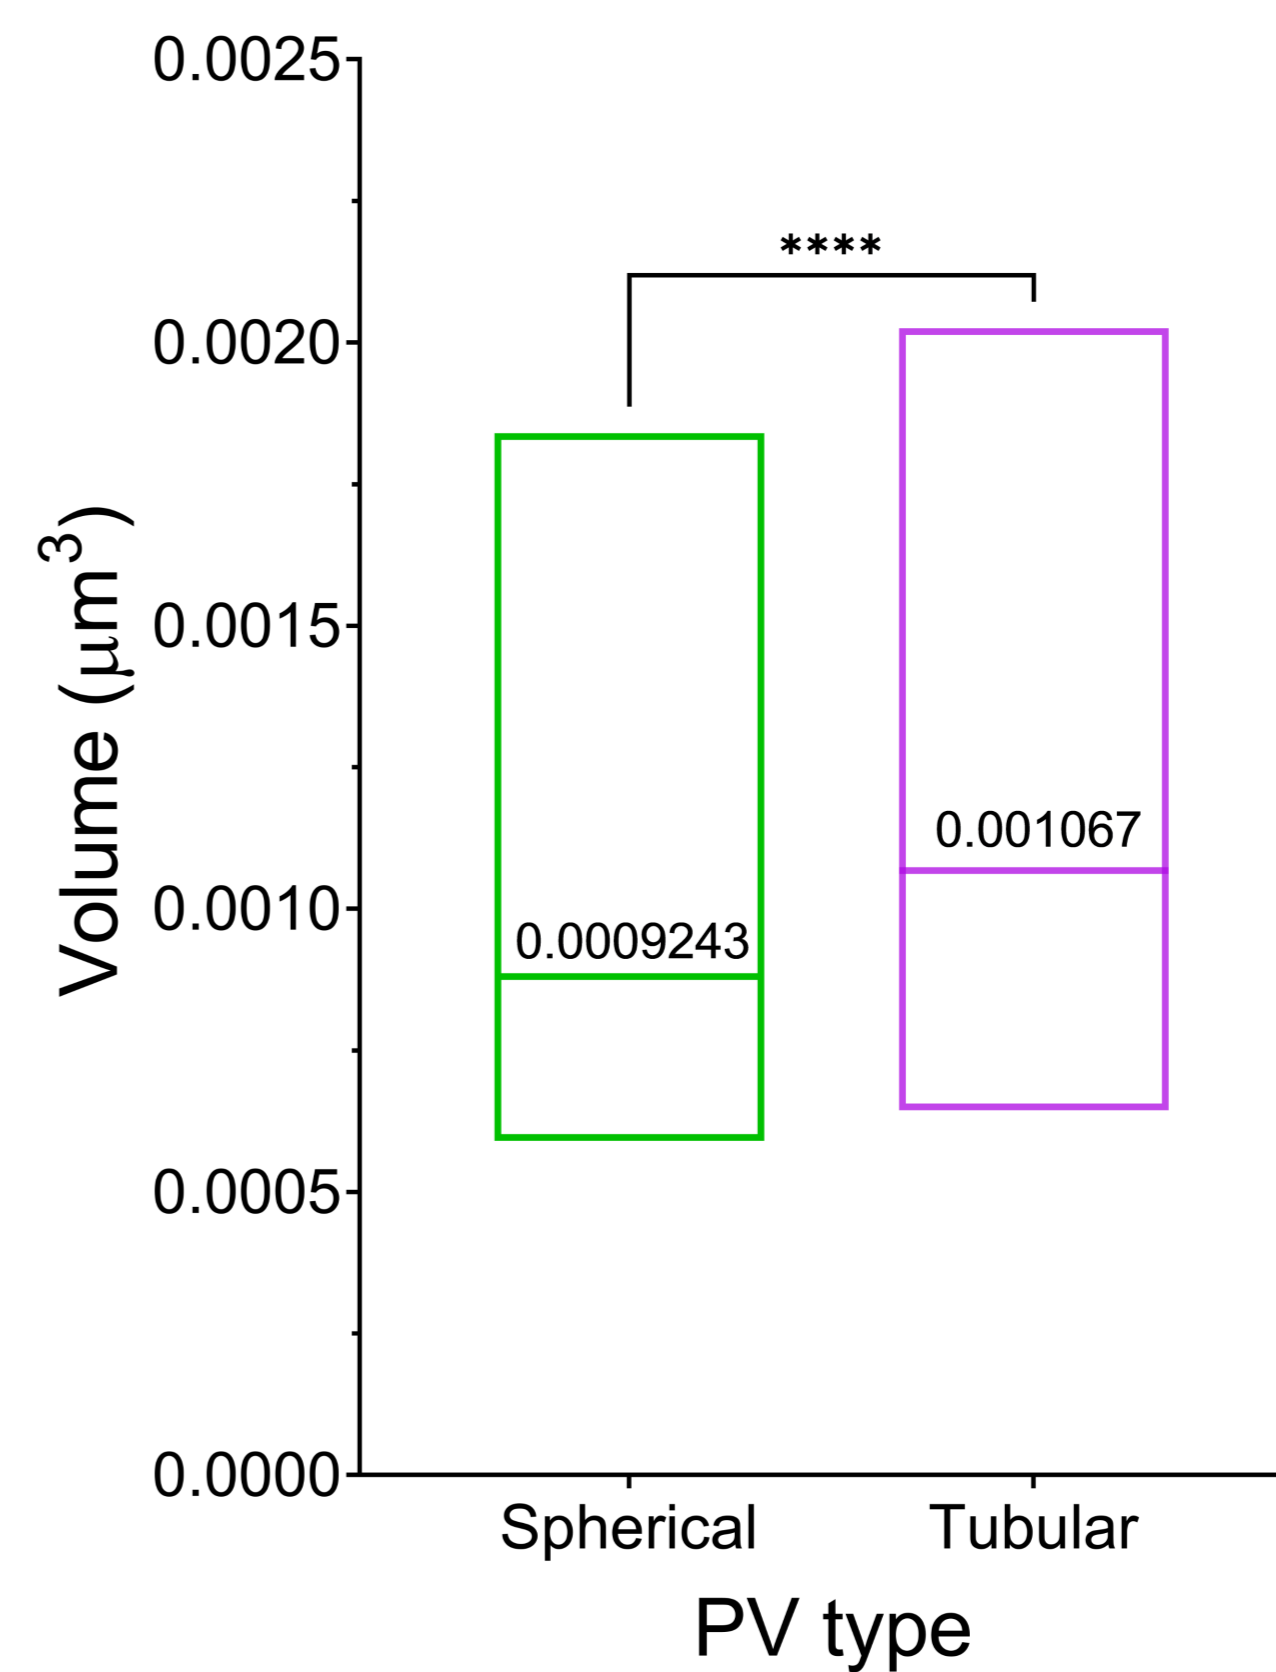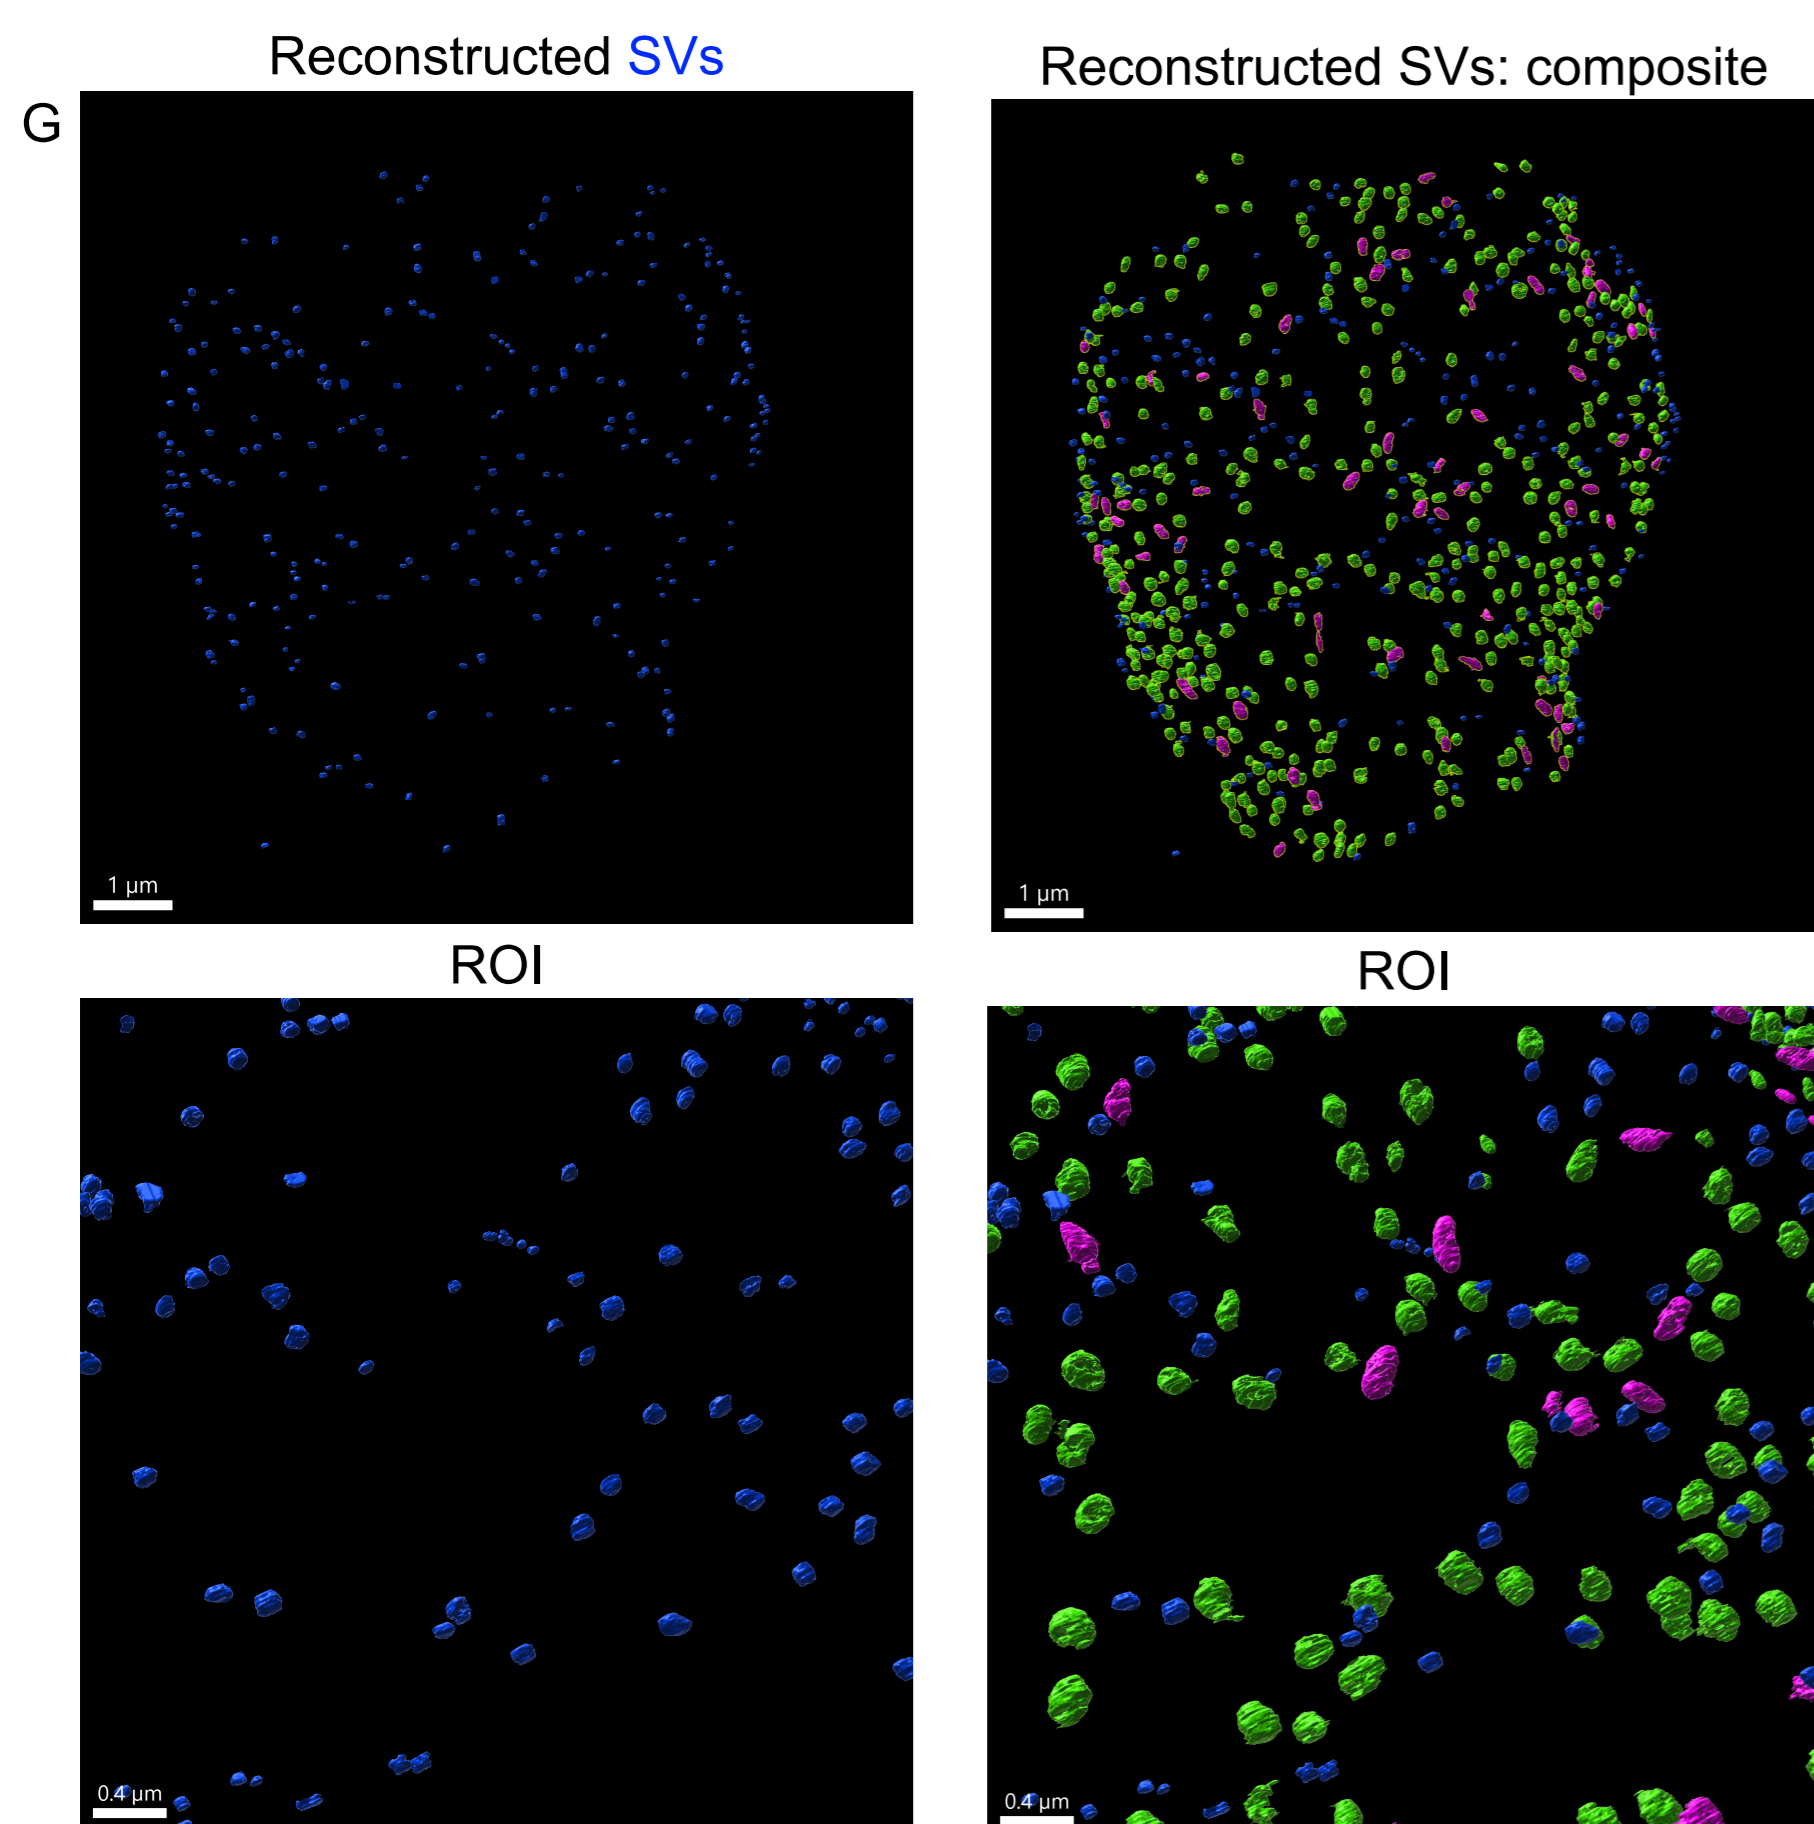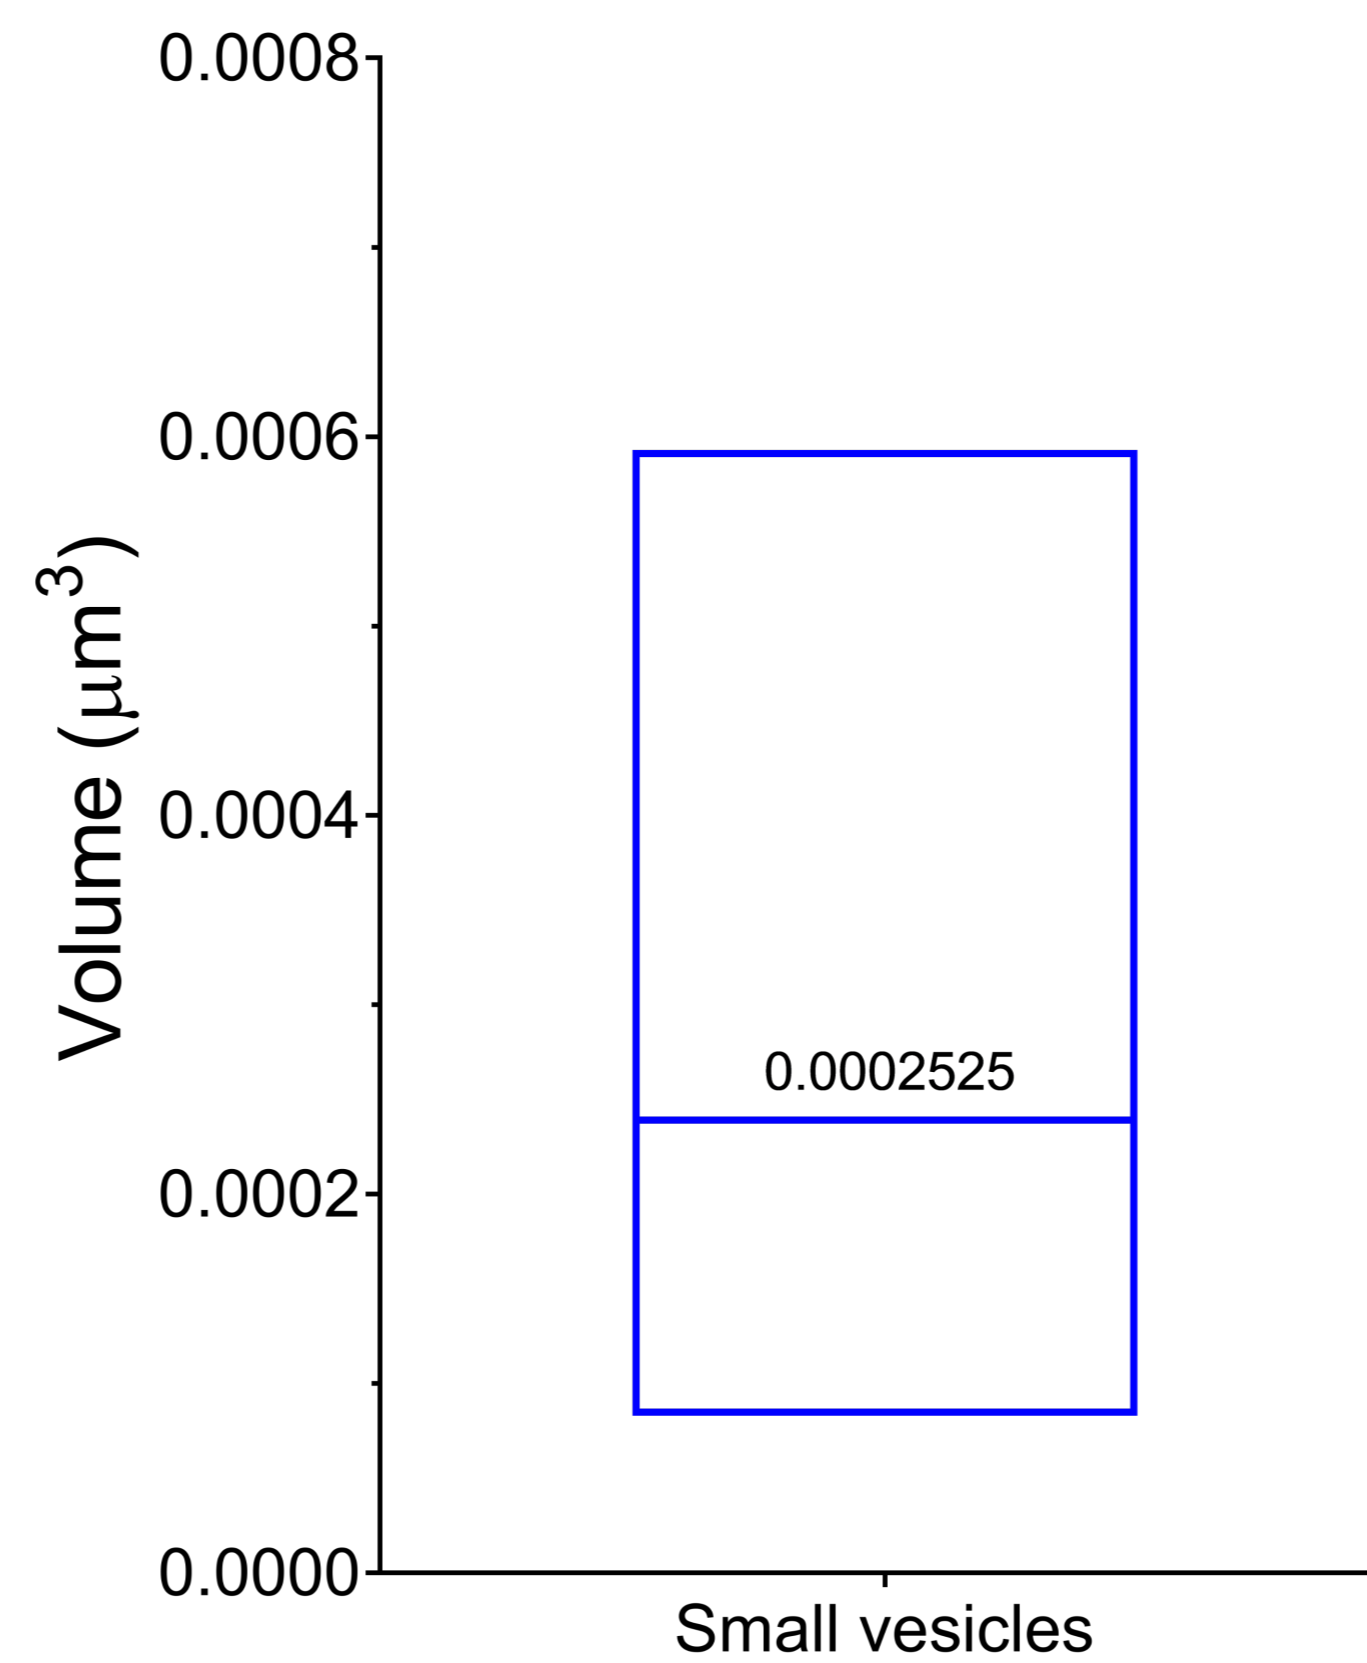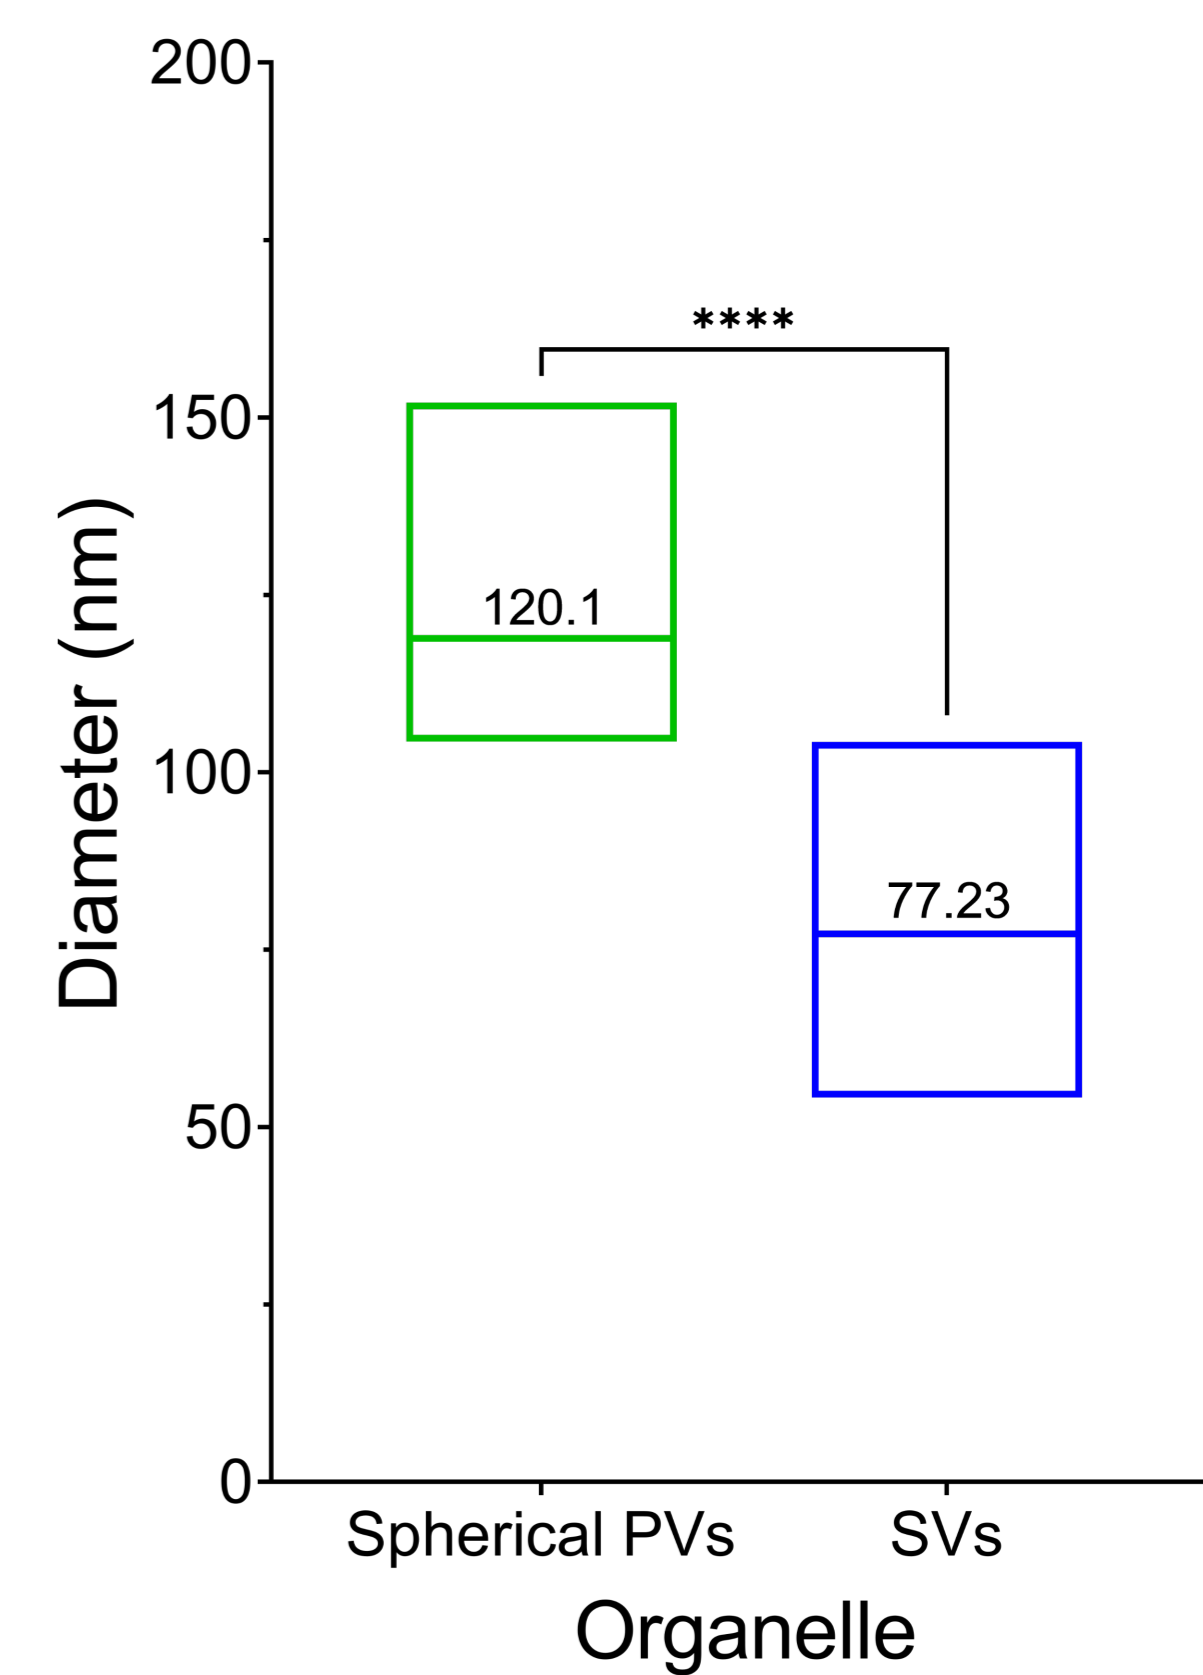

Figure 2

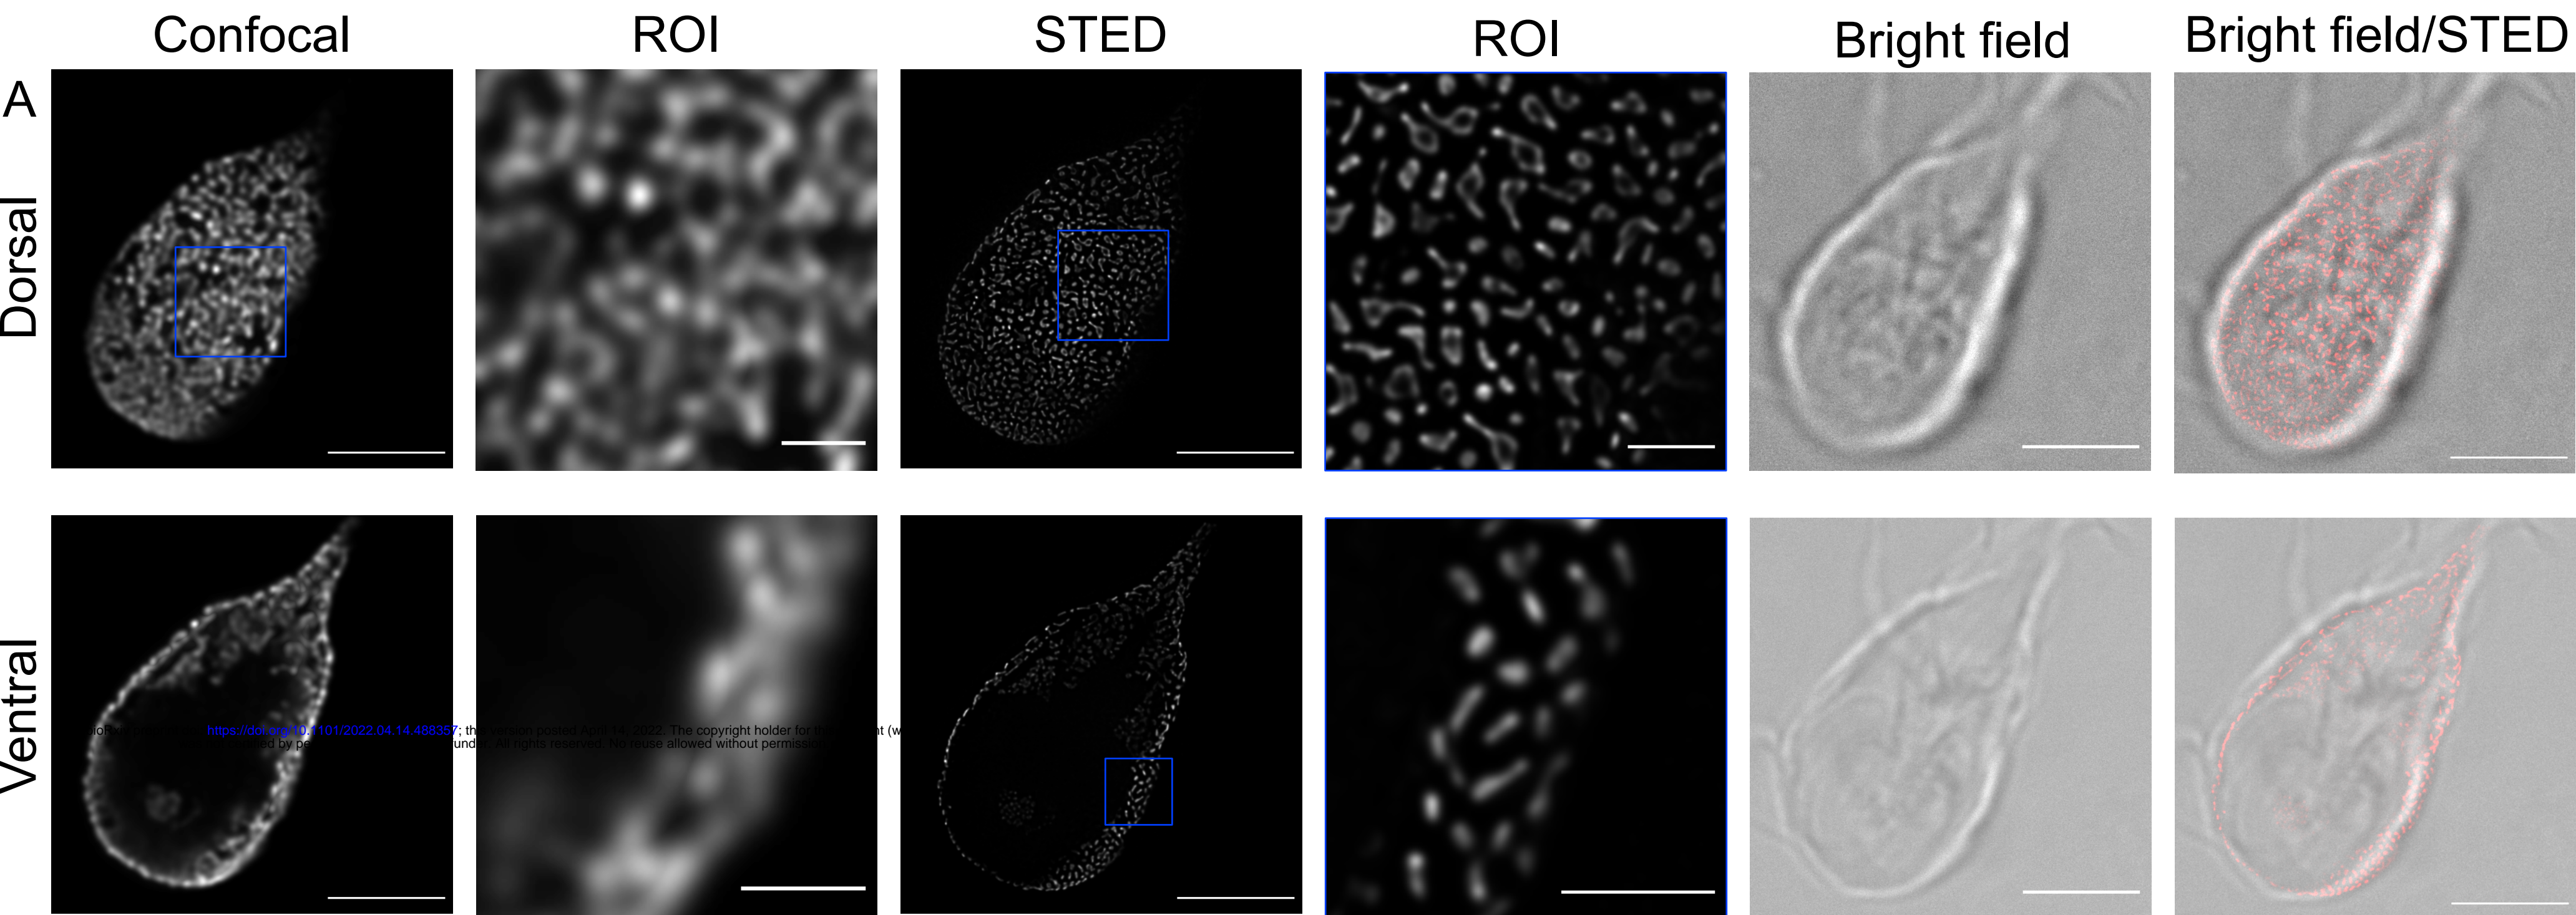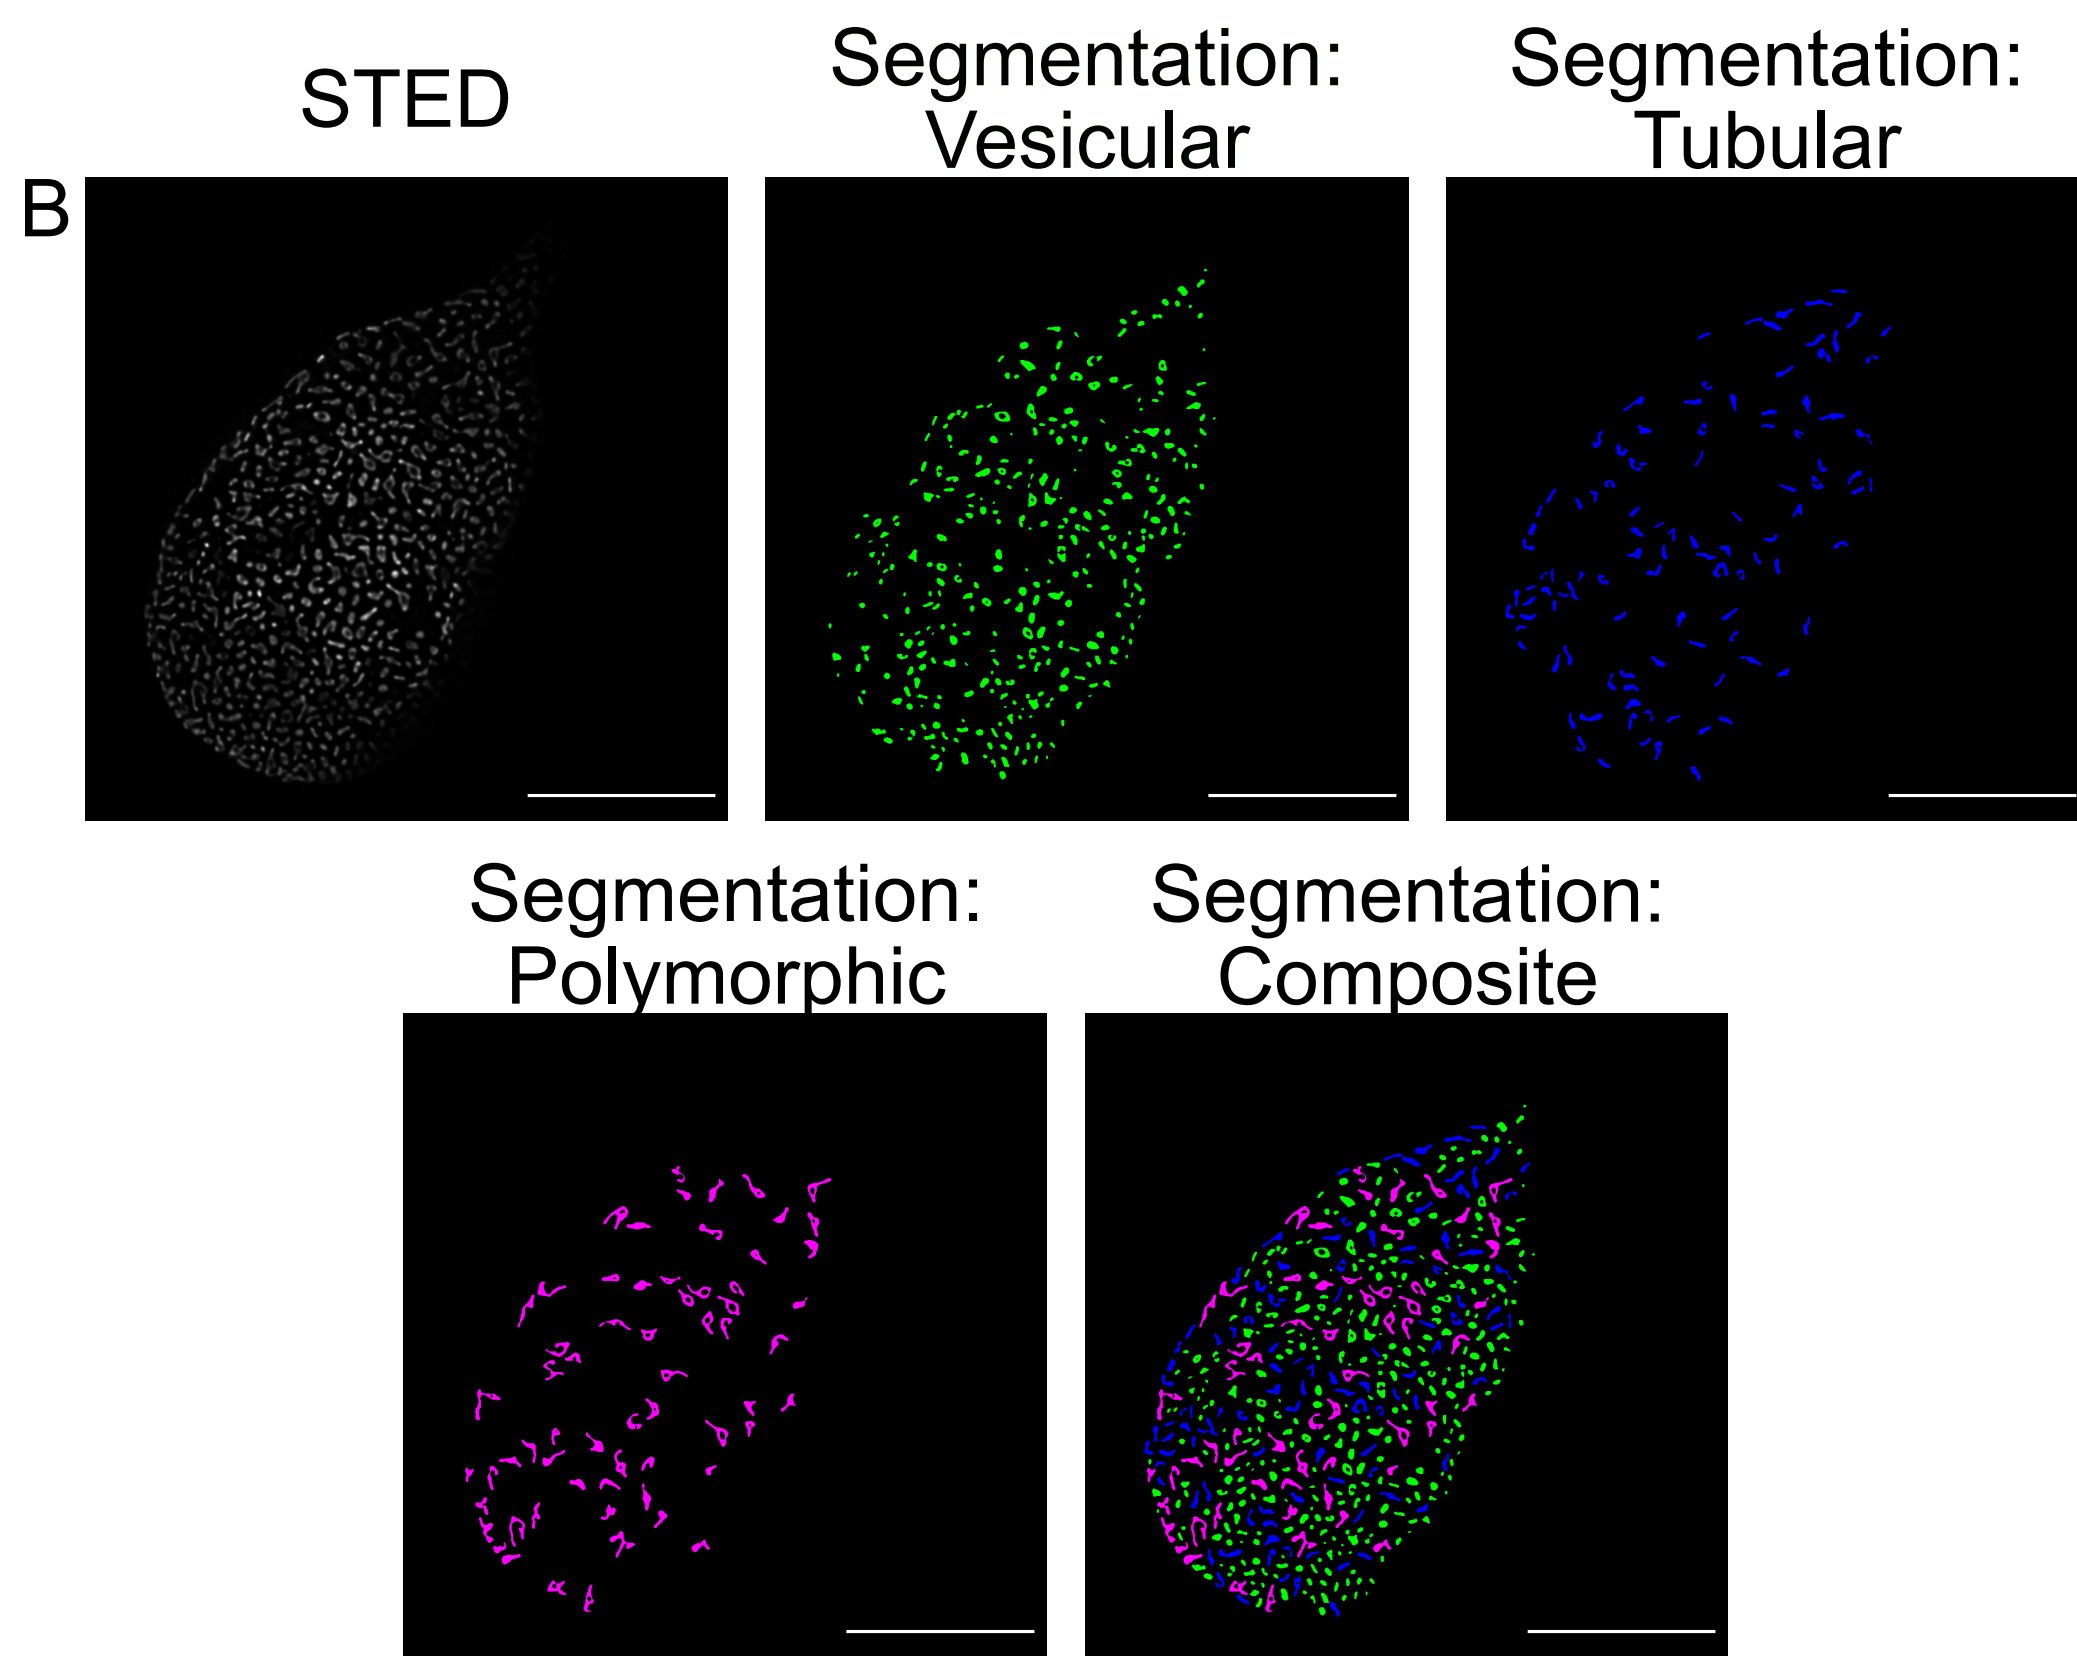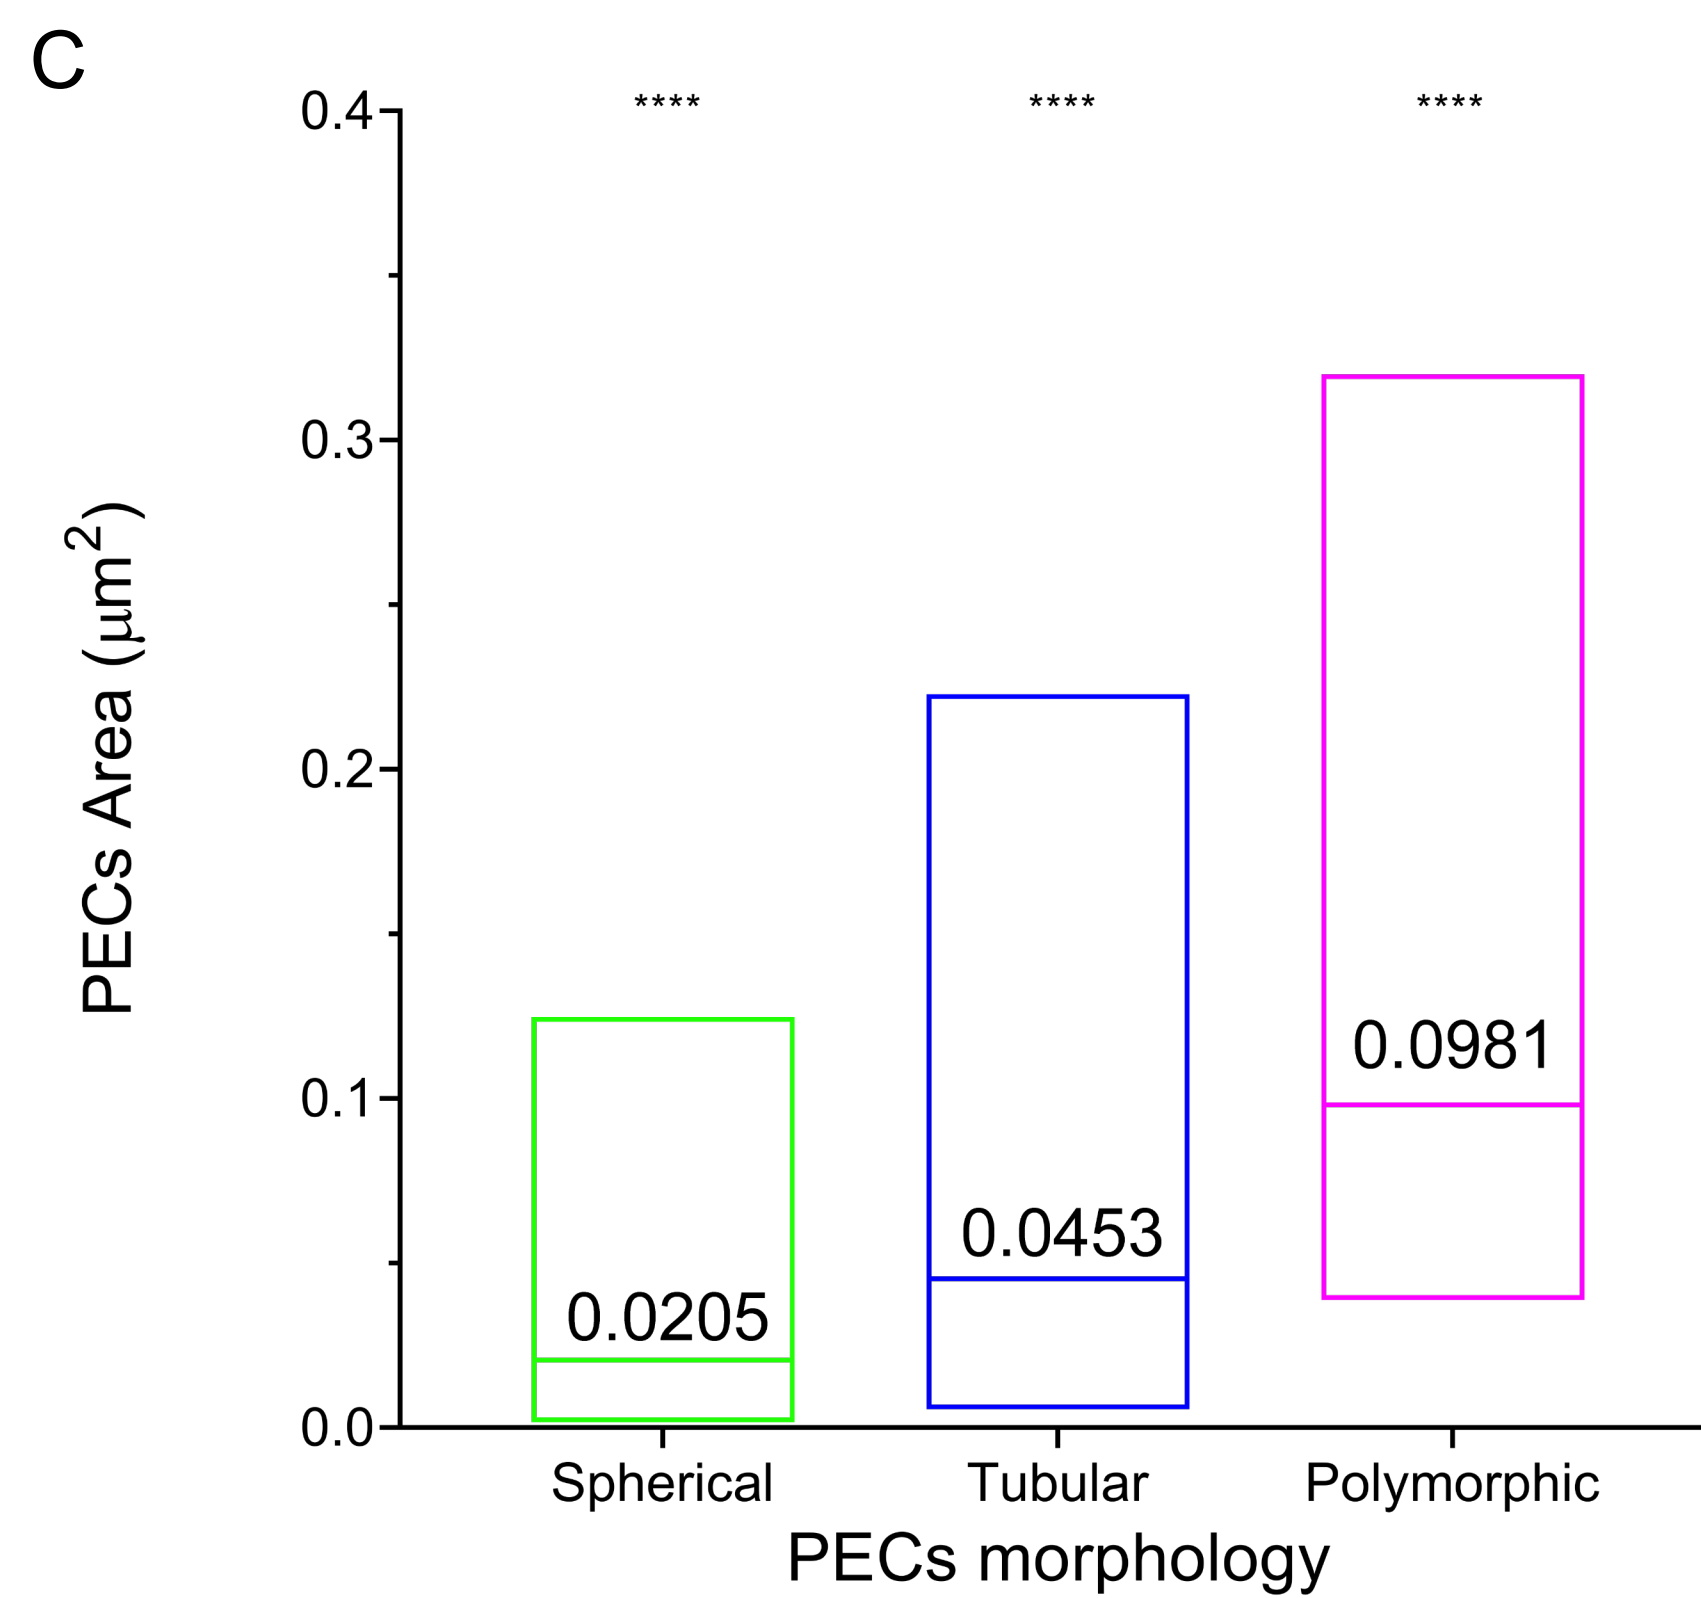

Figure 3

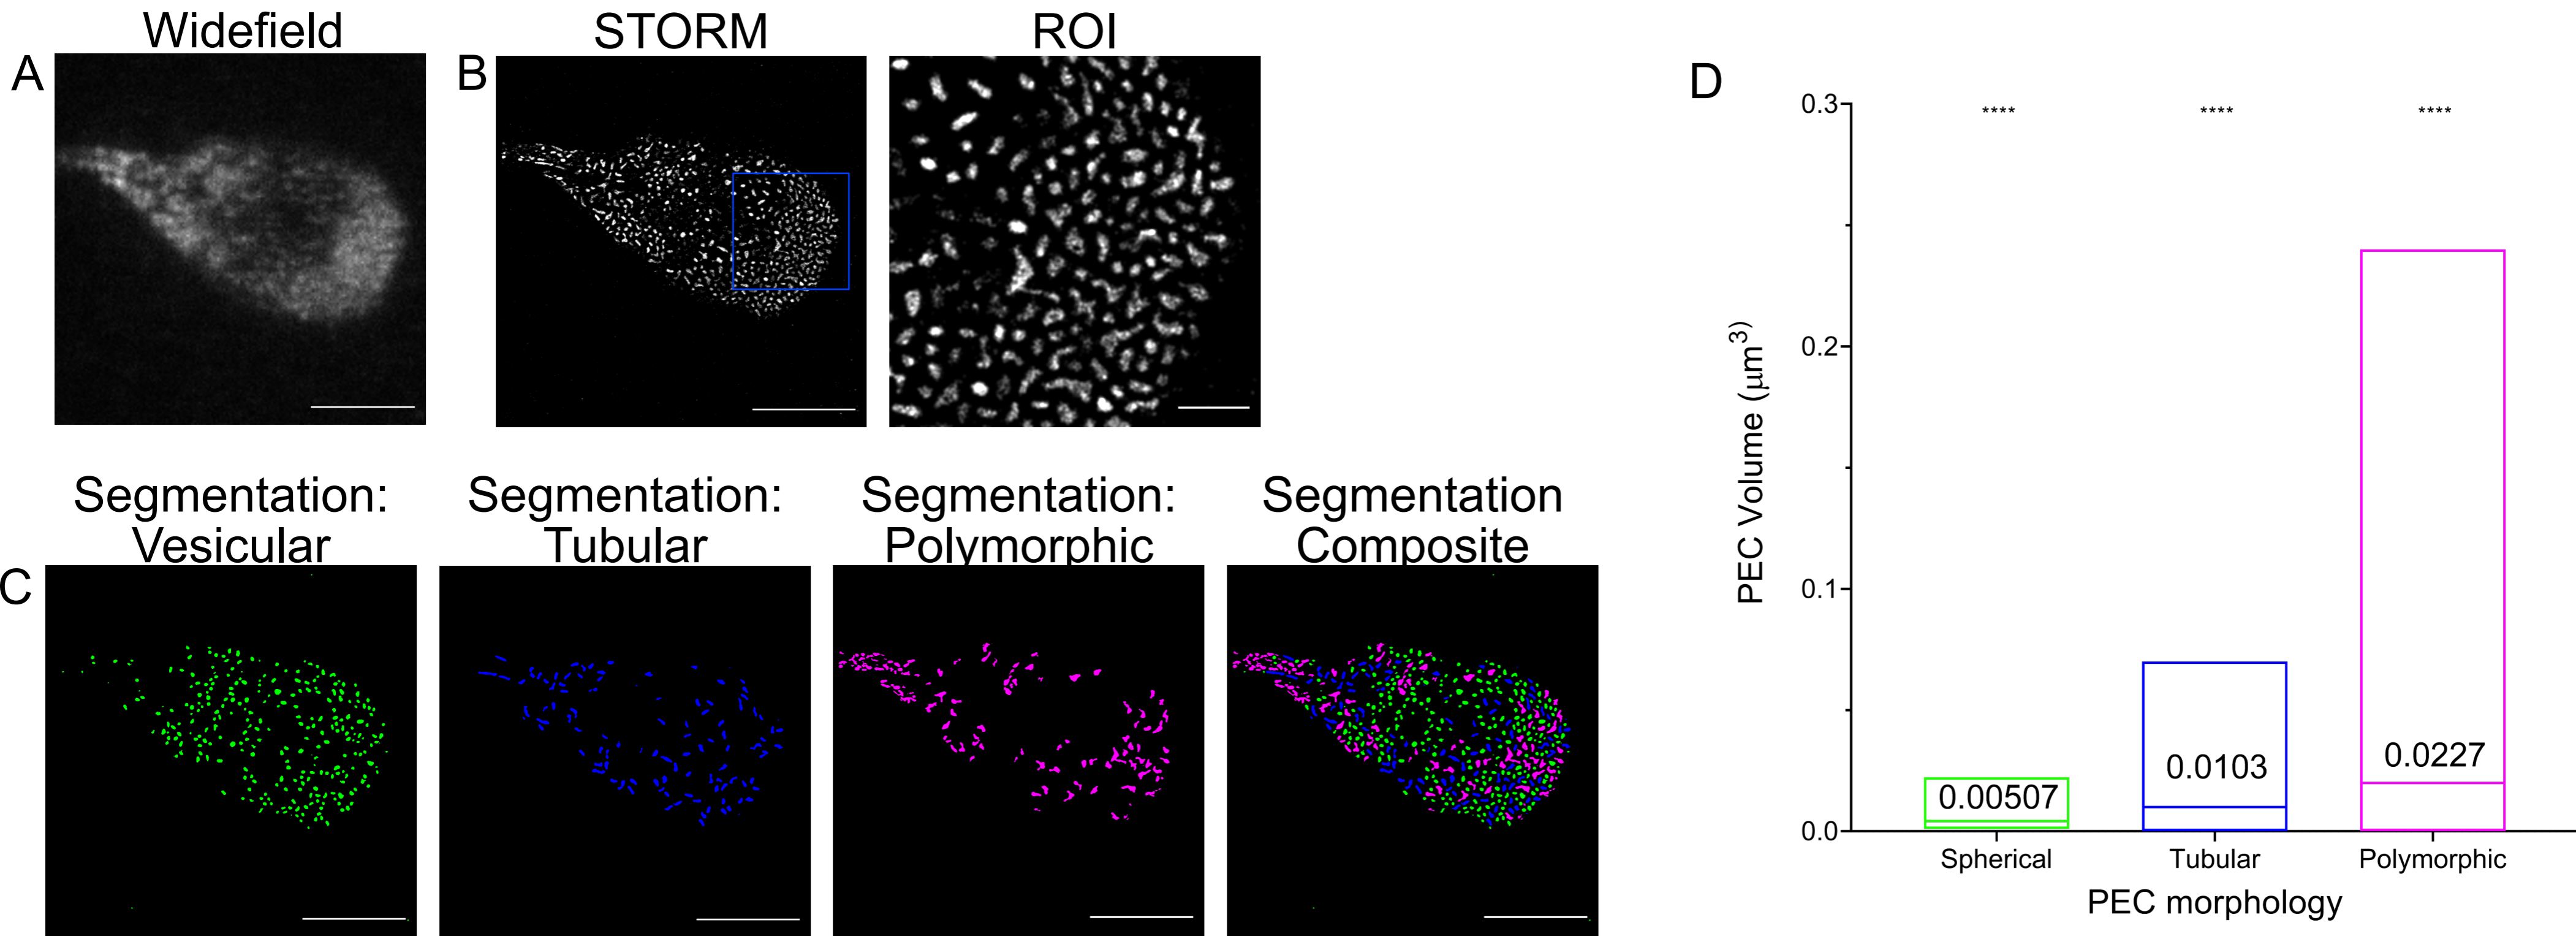

Figure 4

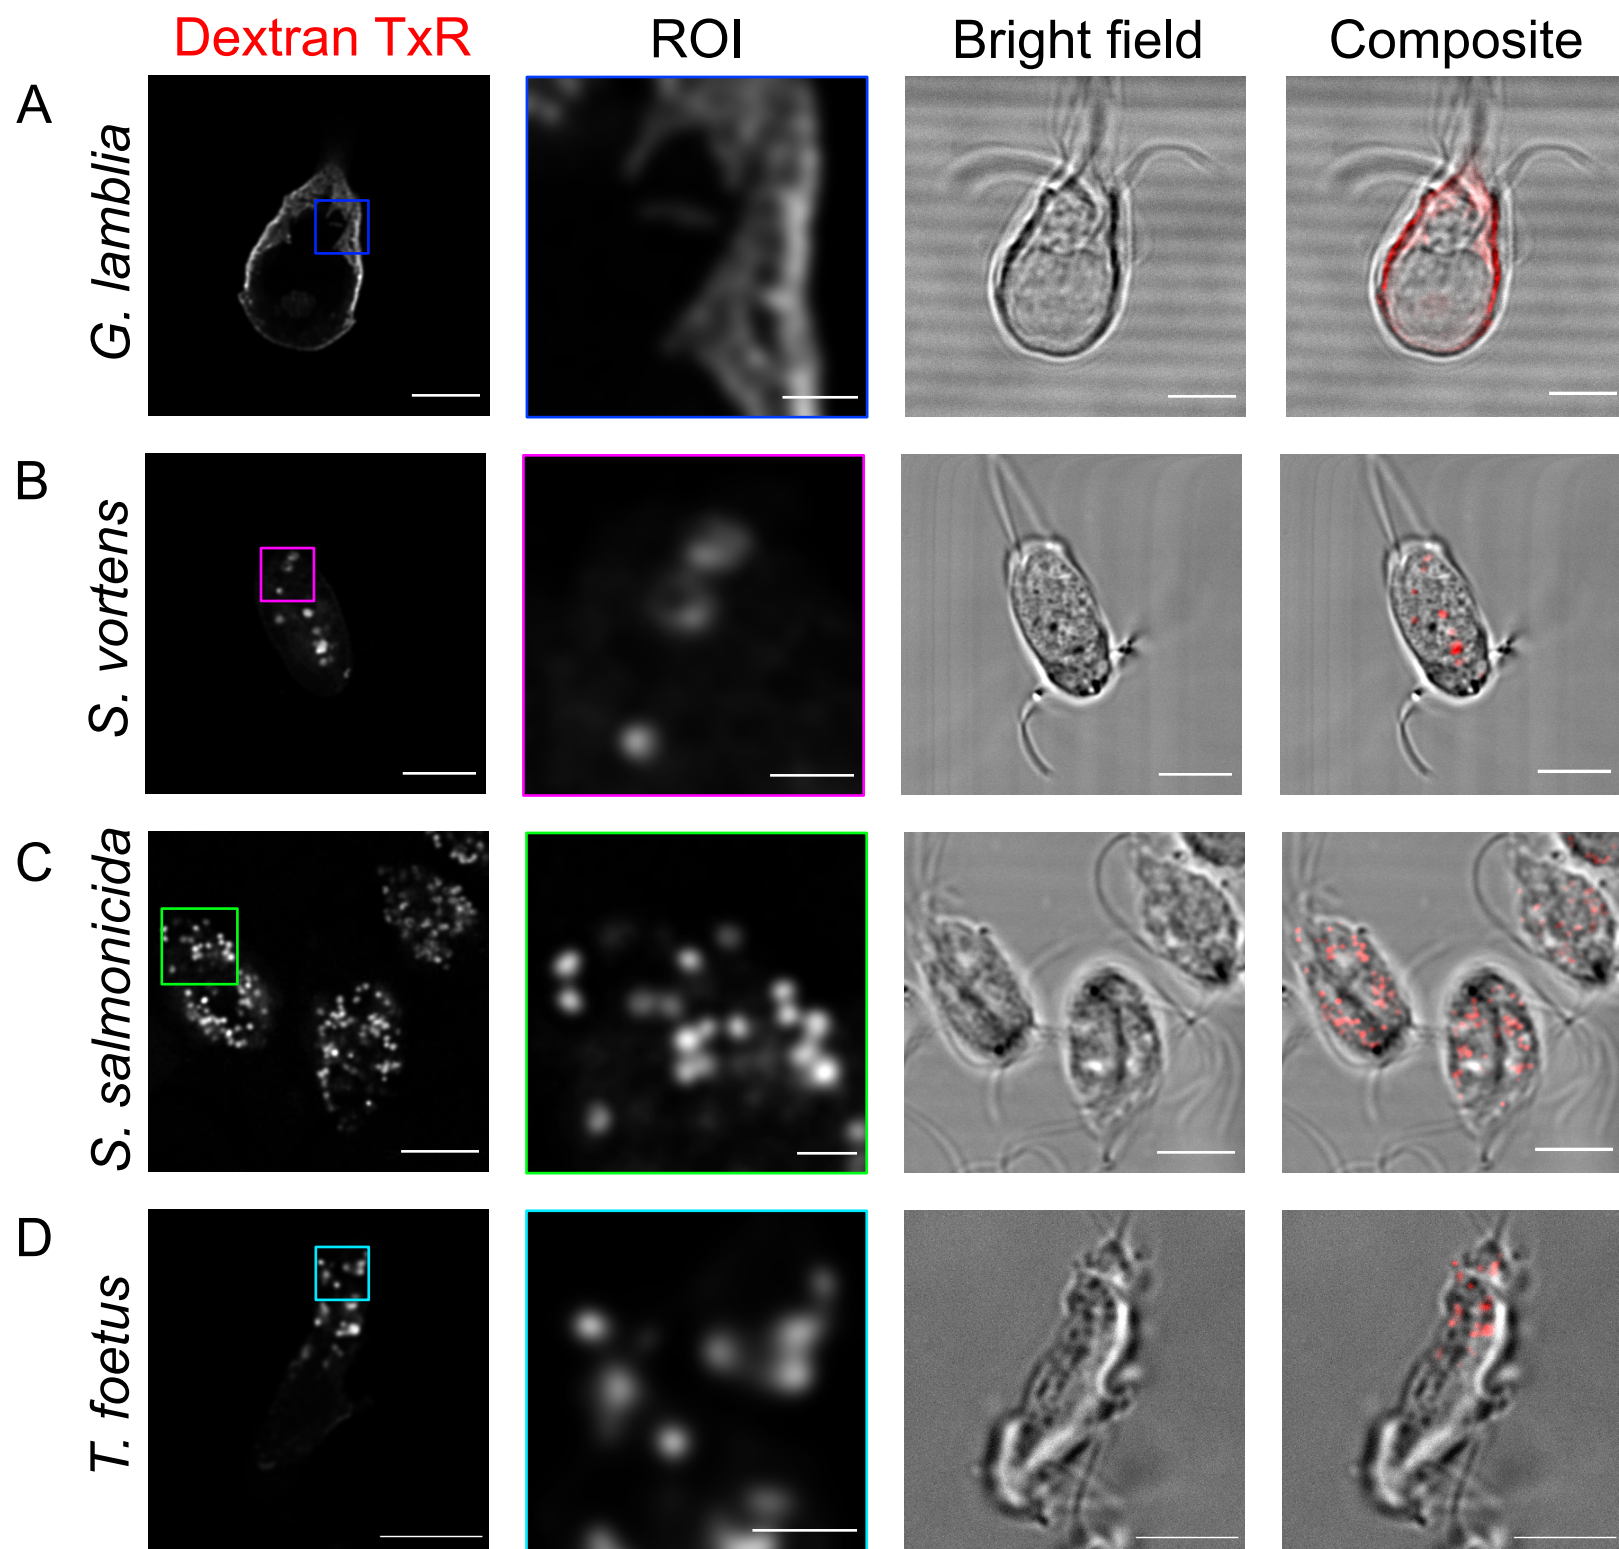

Figure 5

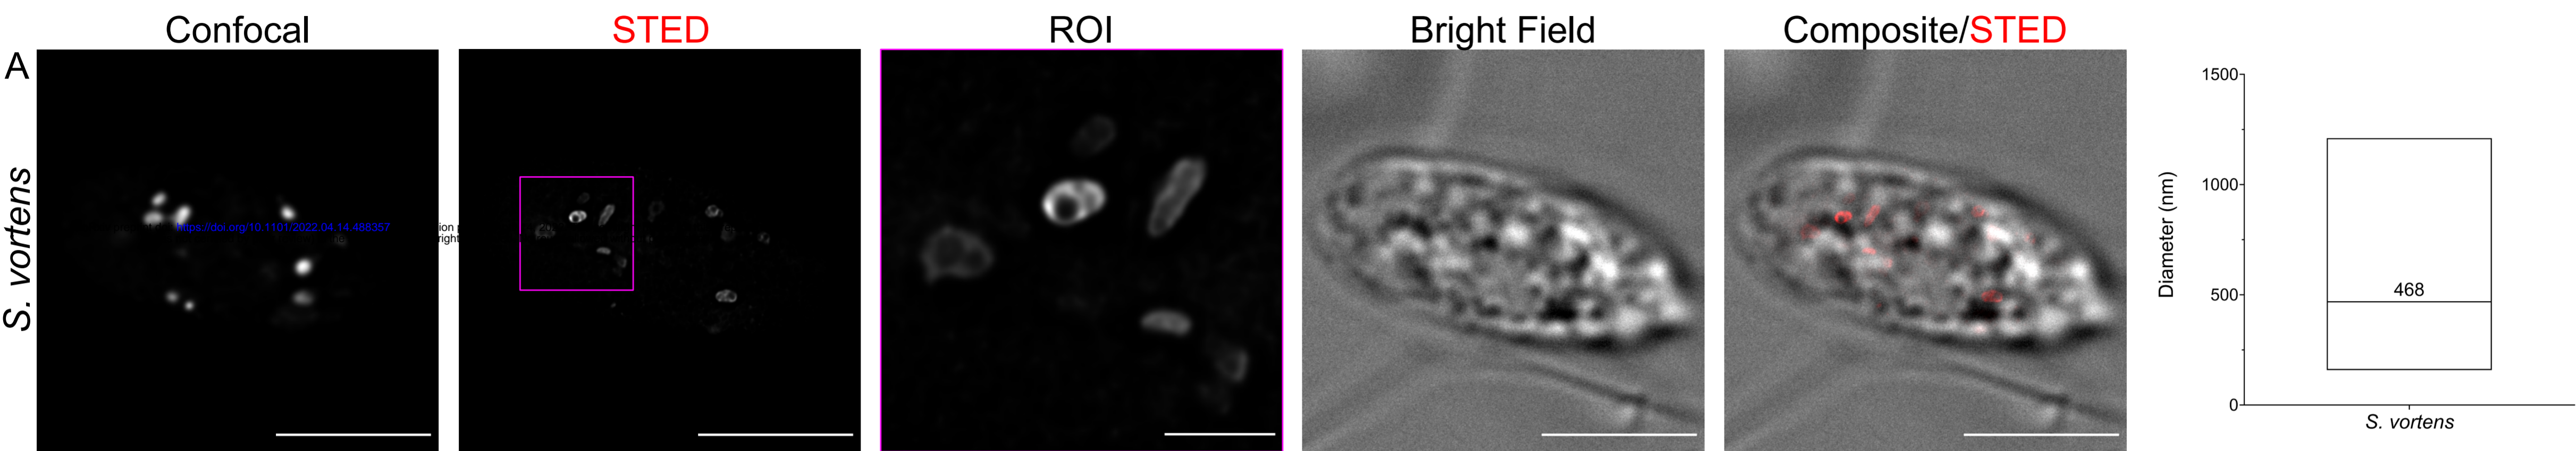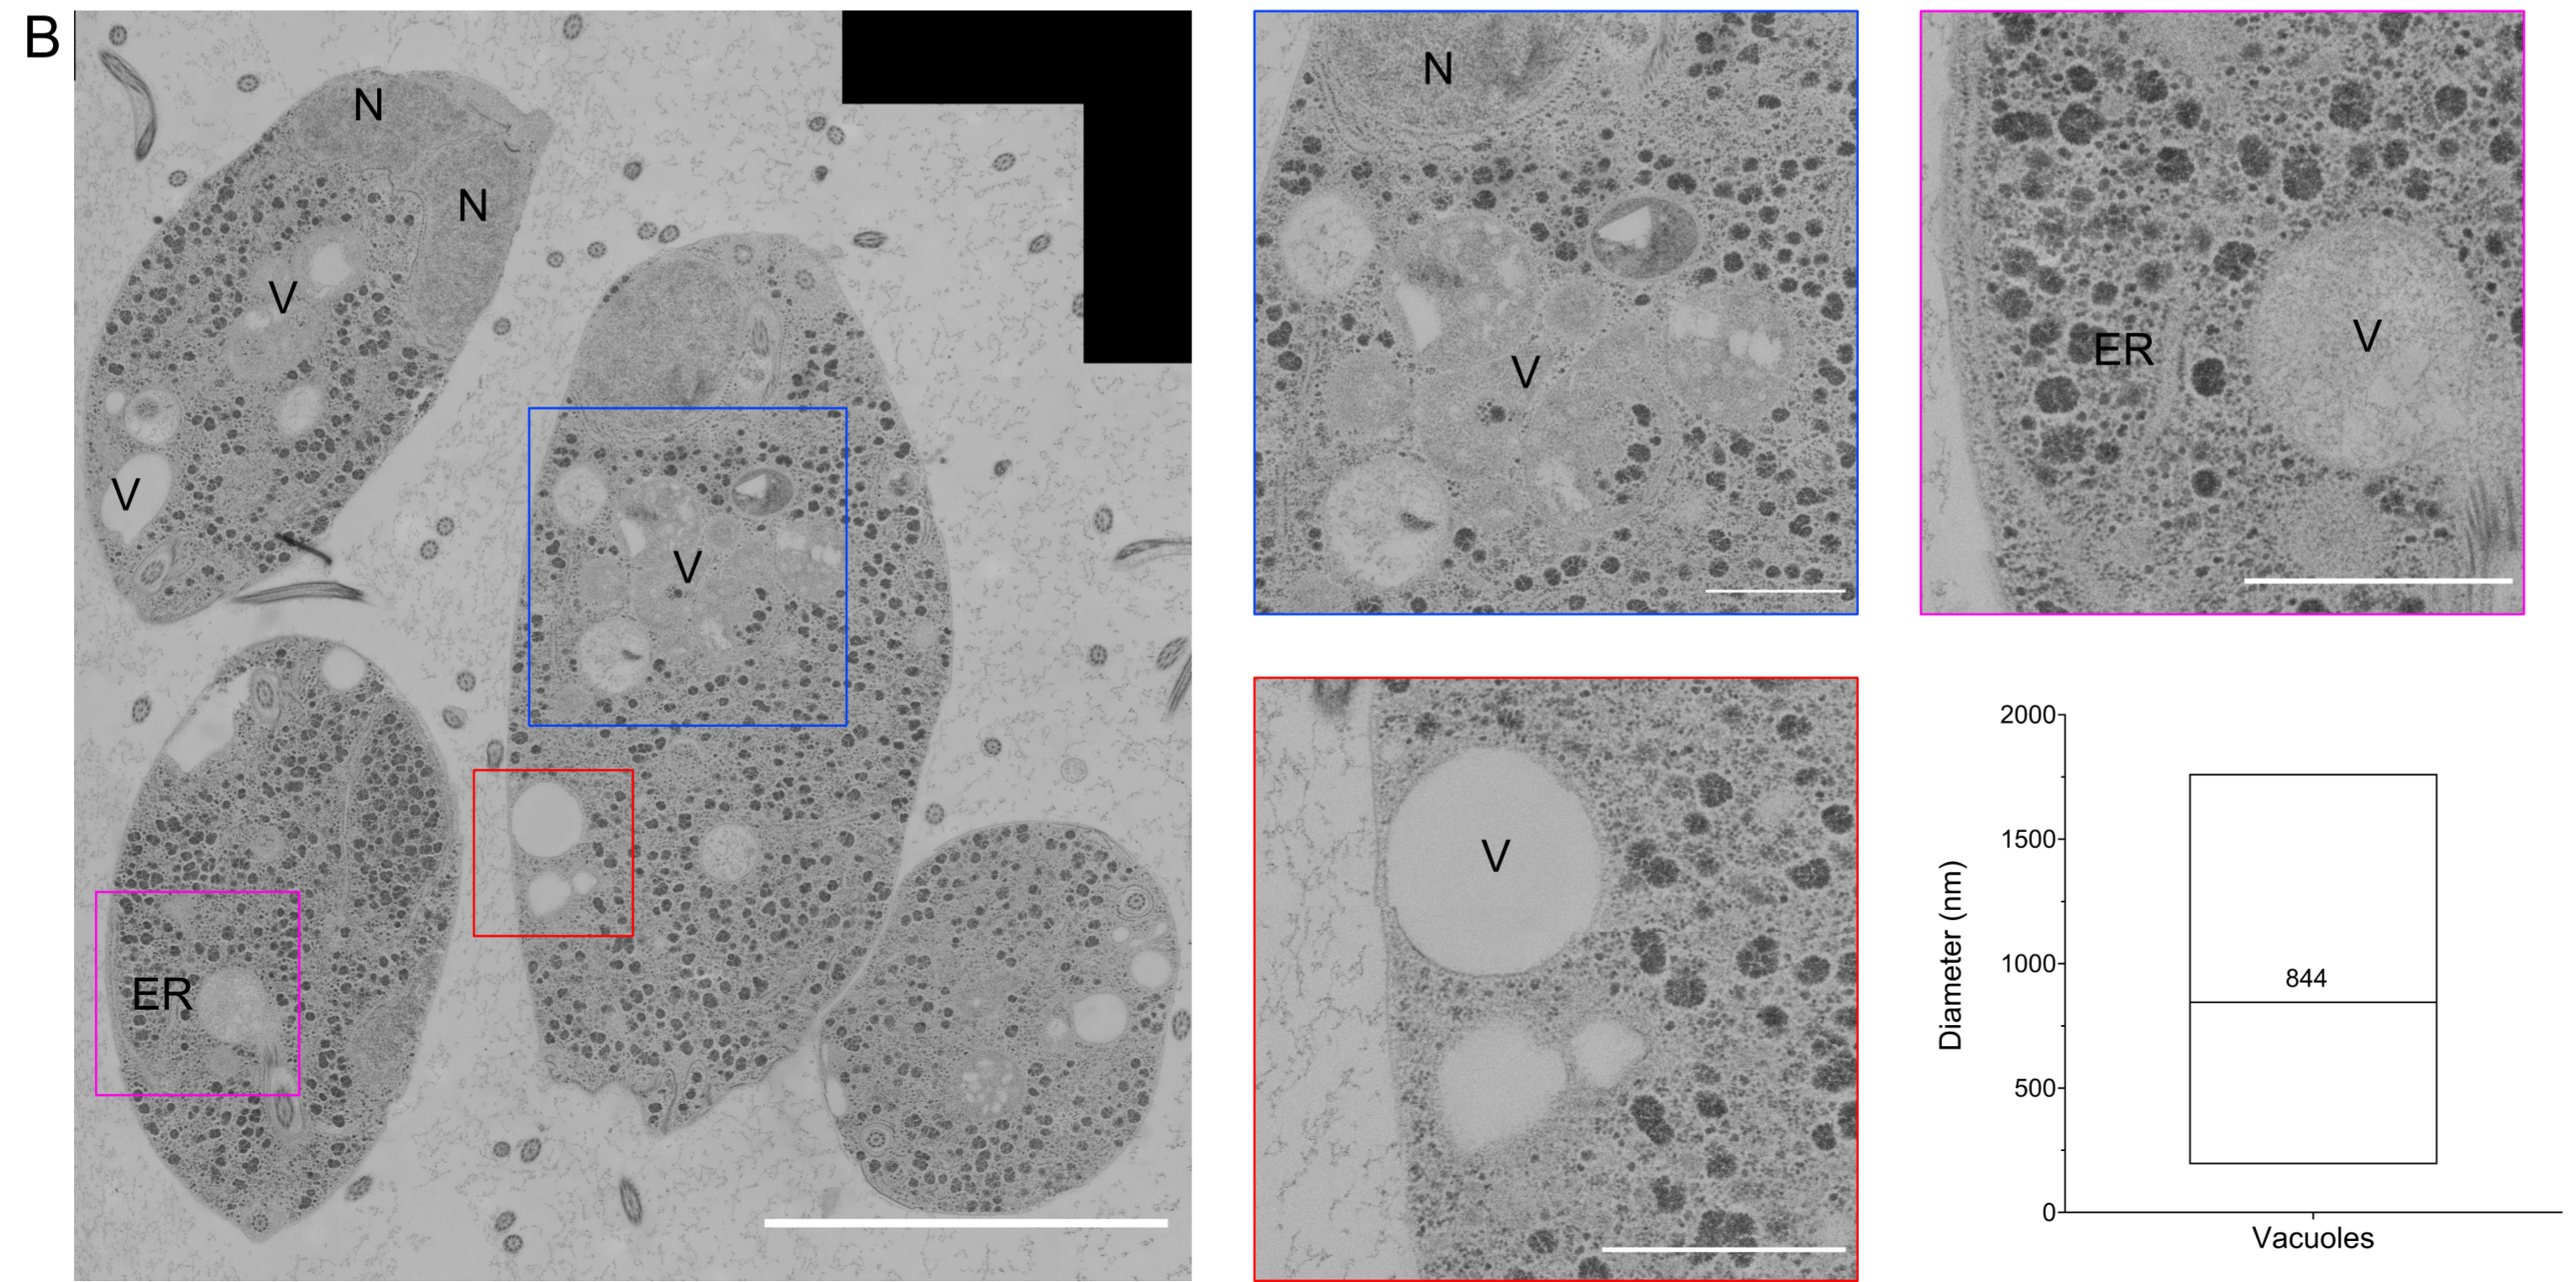



Figure 6

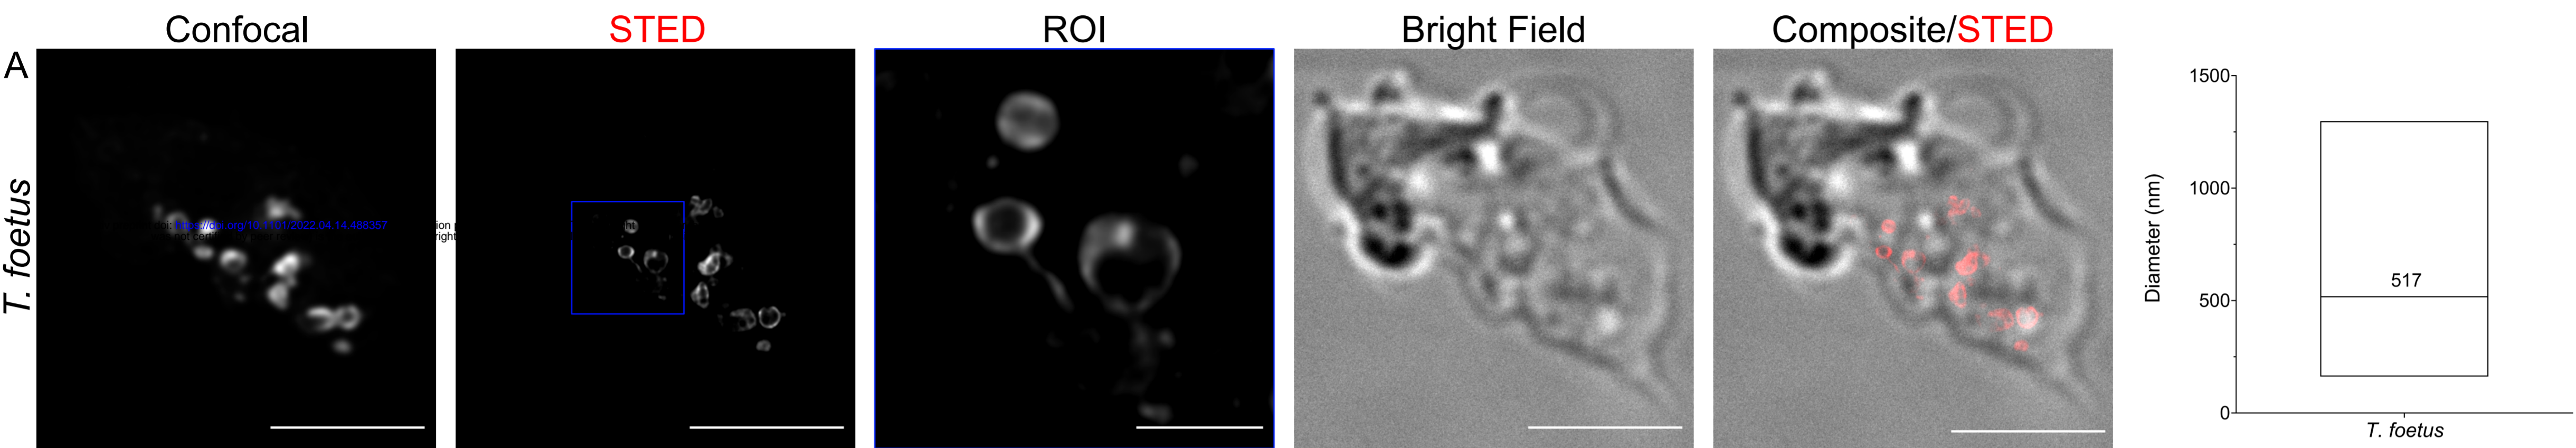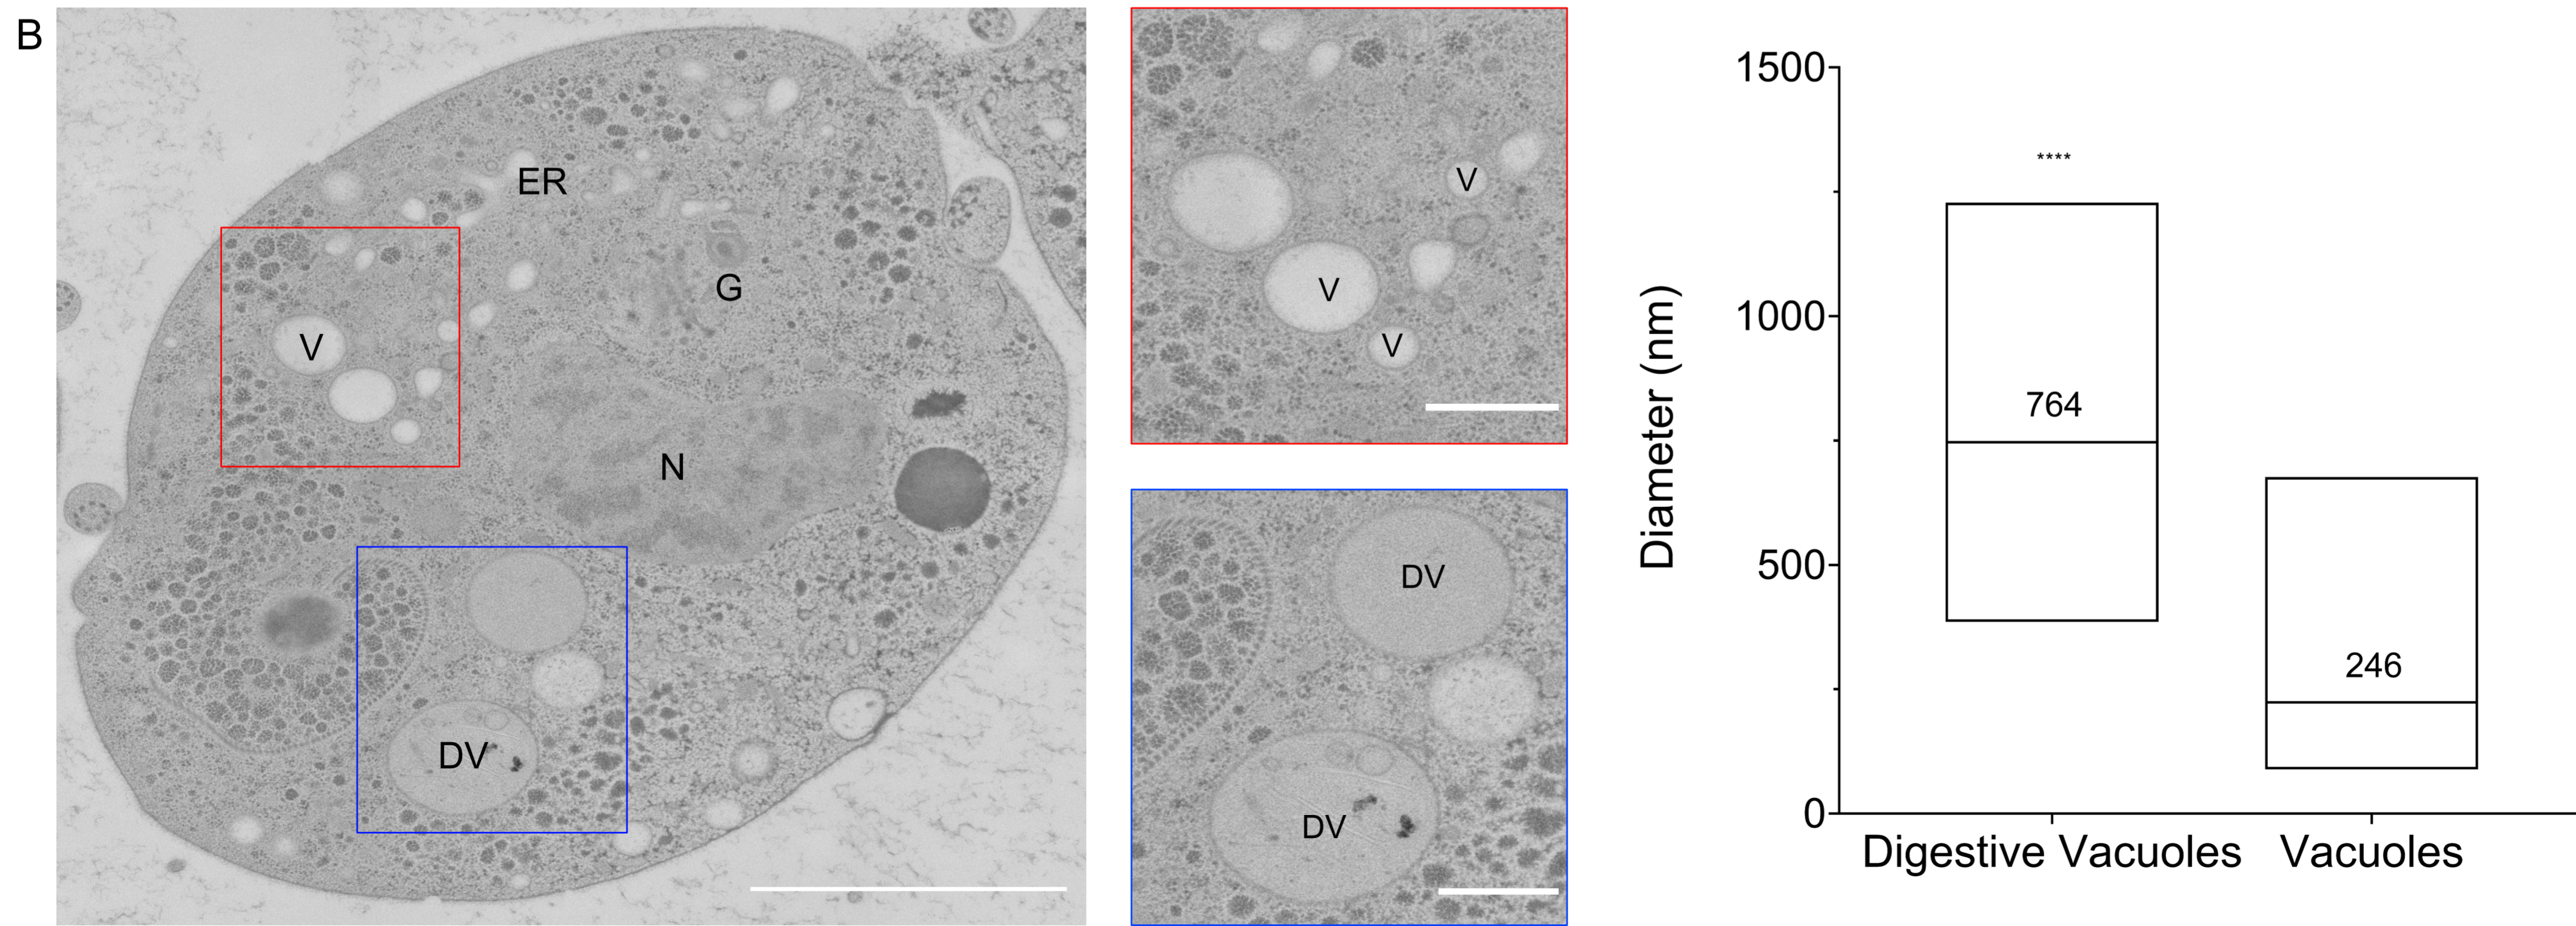

Figure 7

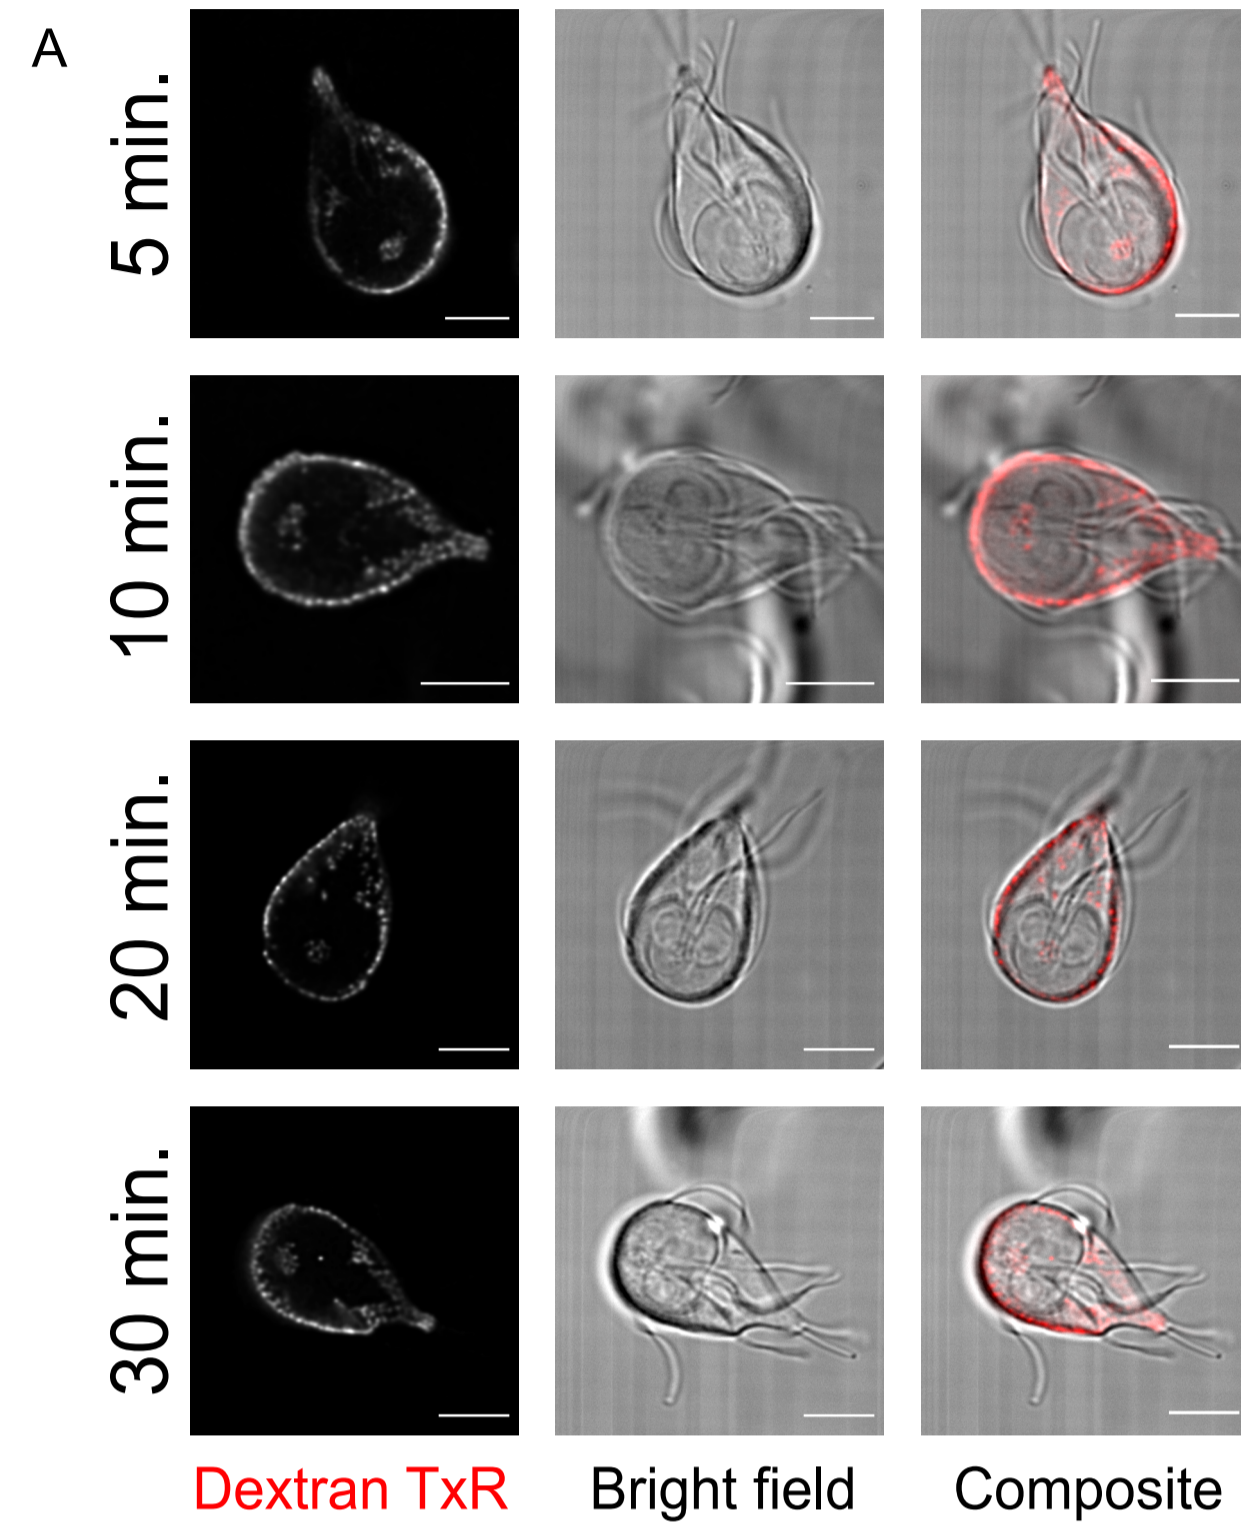

*G. lamblia*

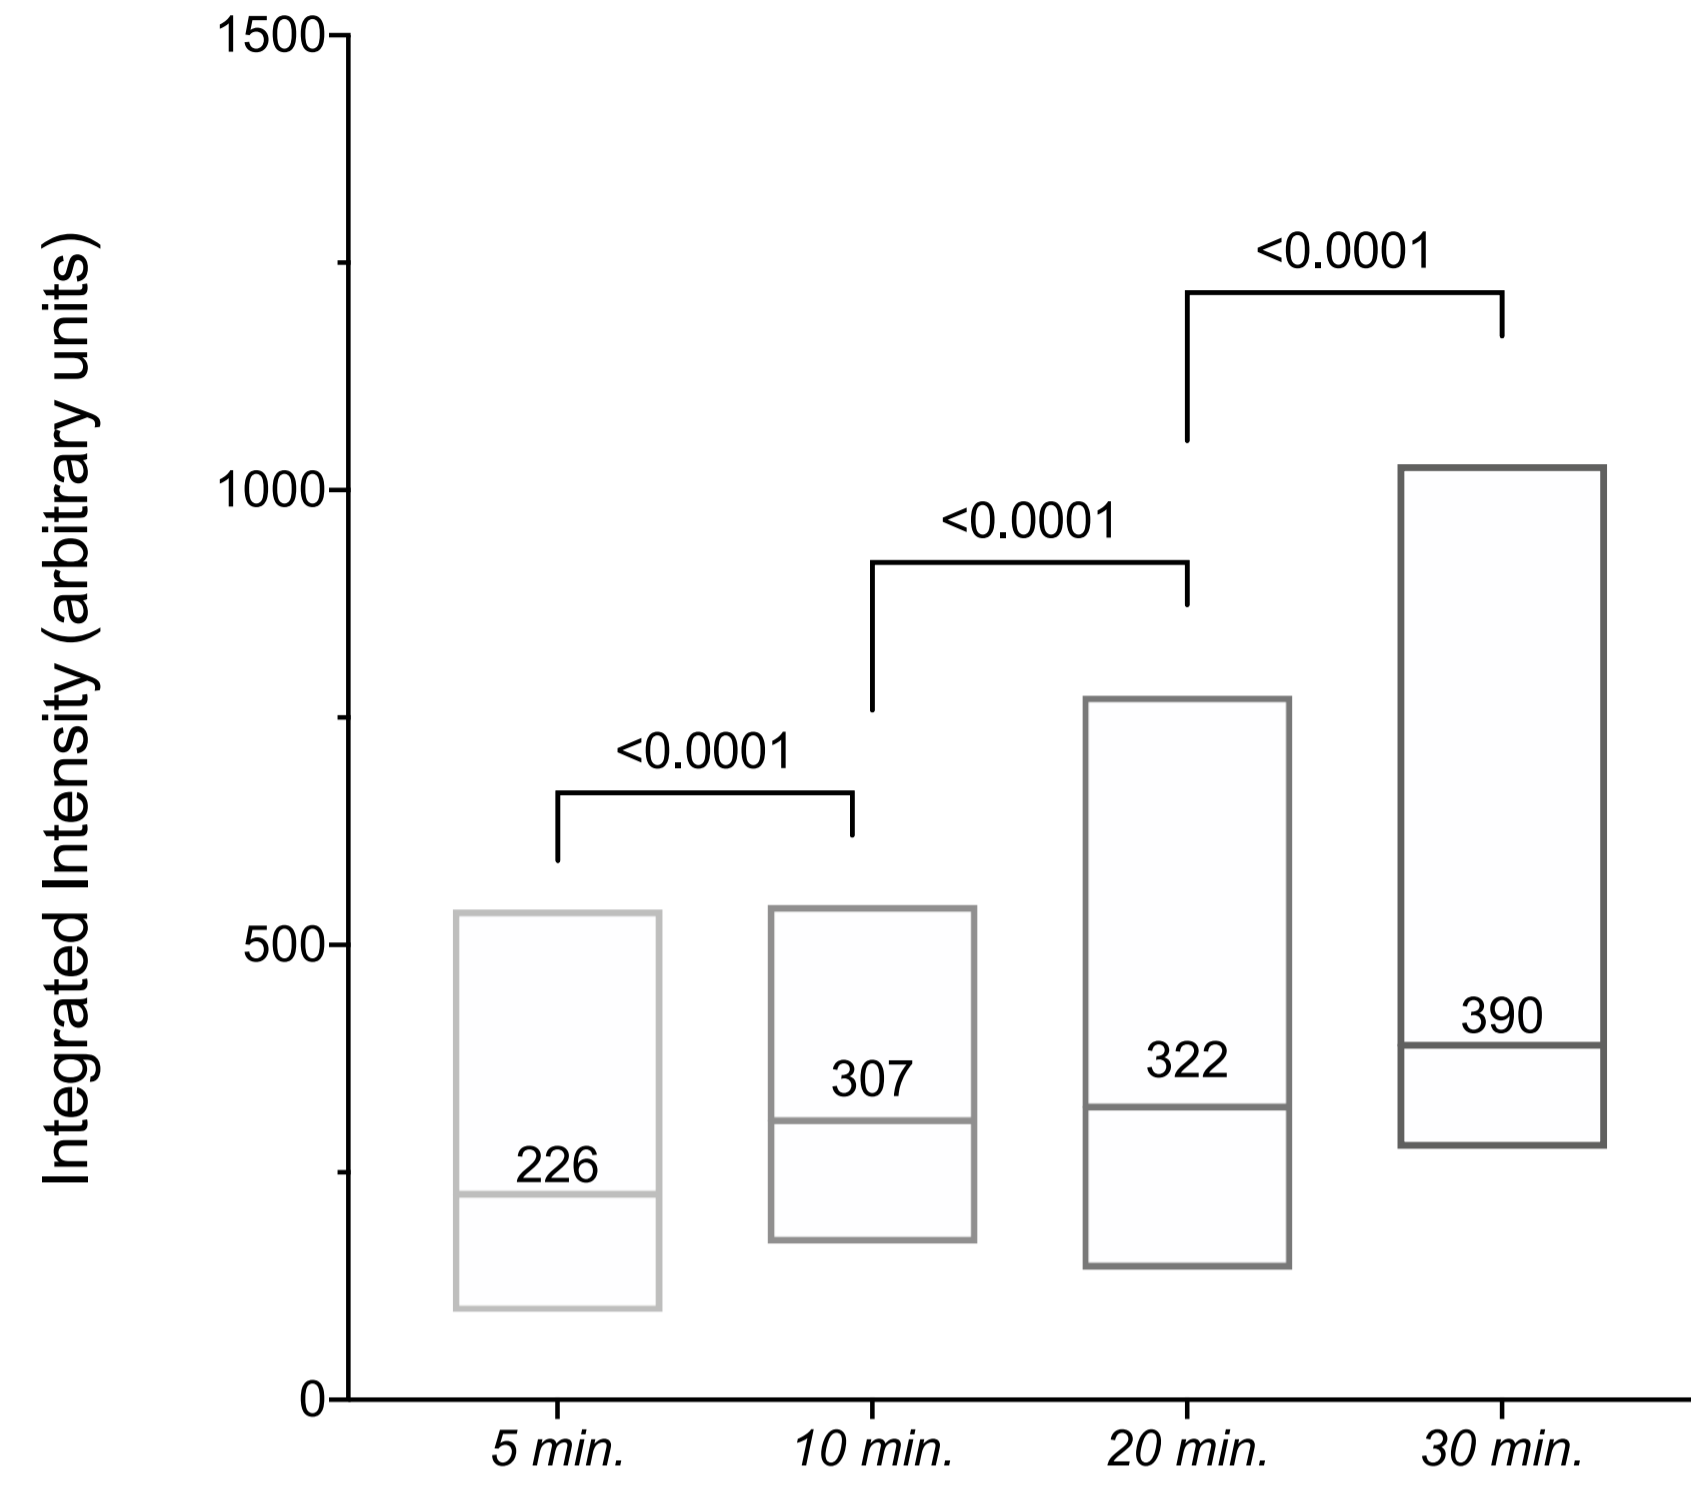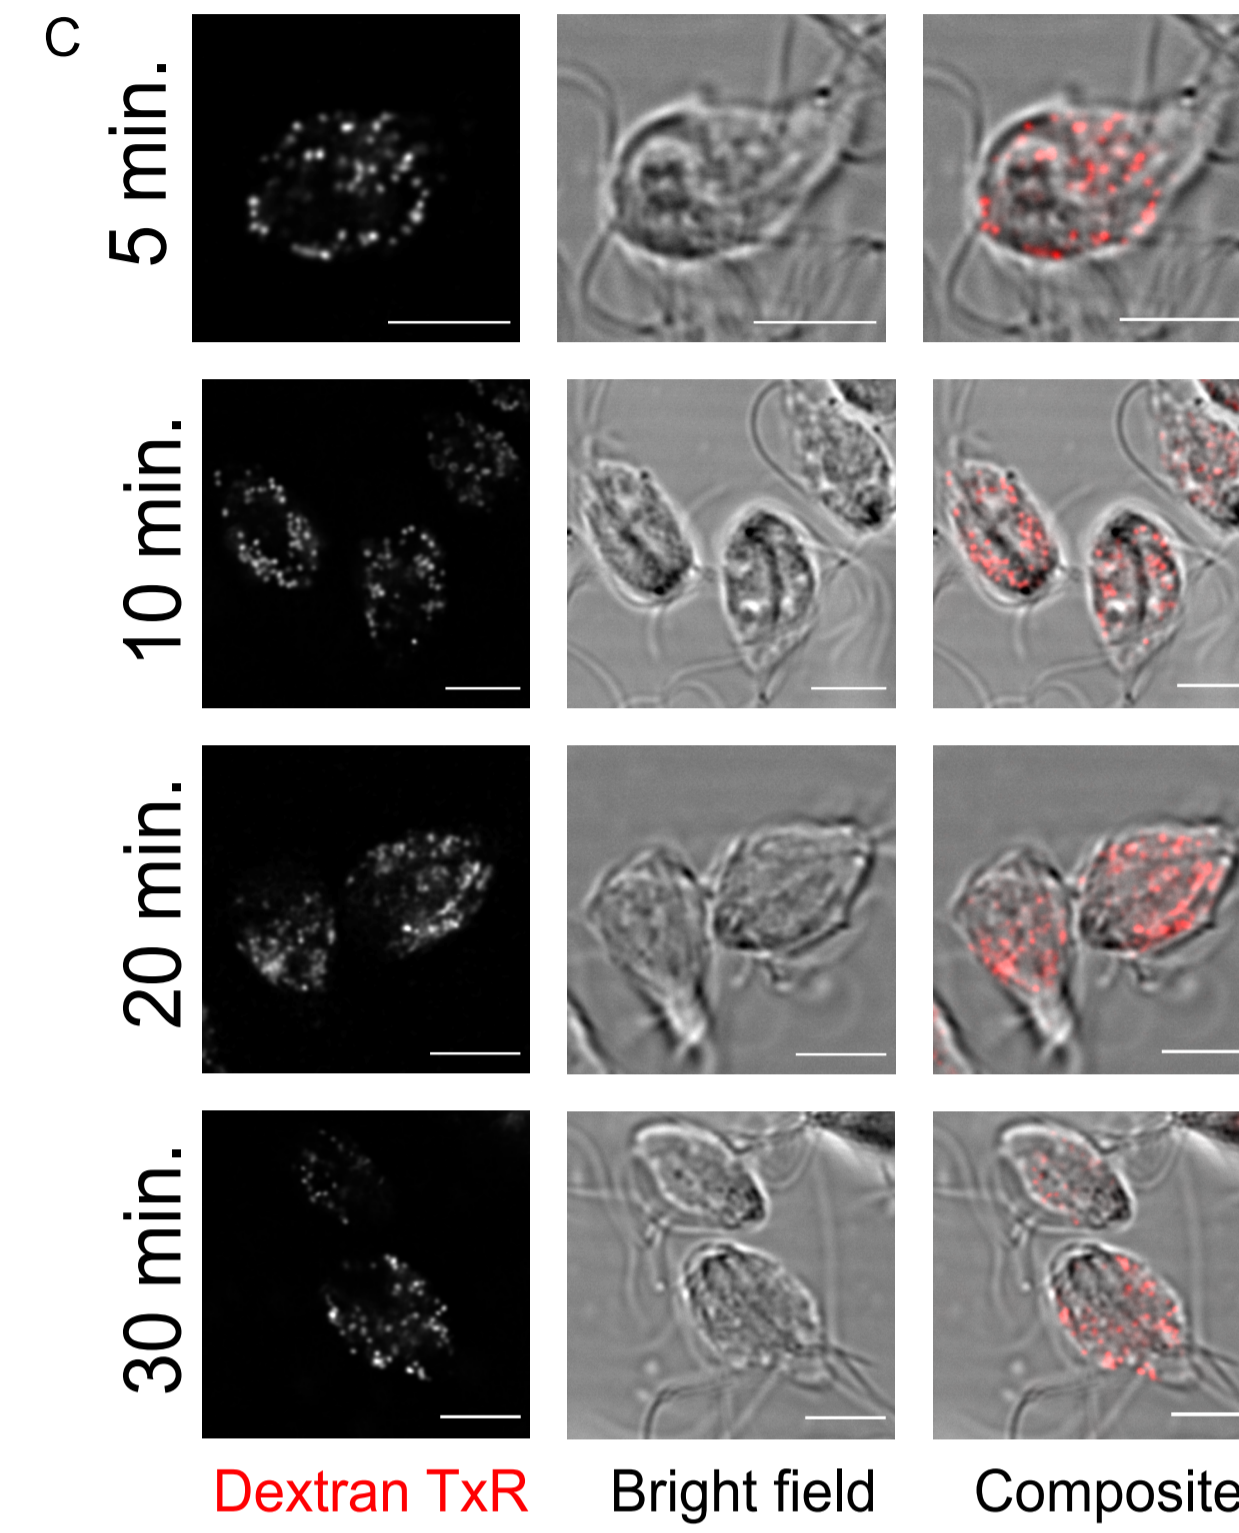

*S. salmonicida*

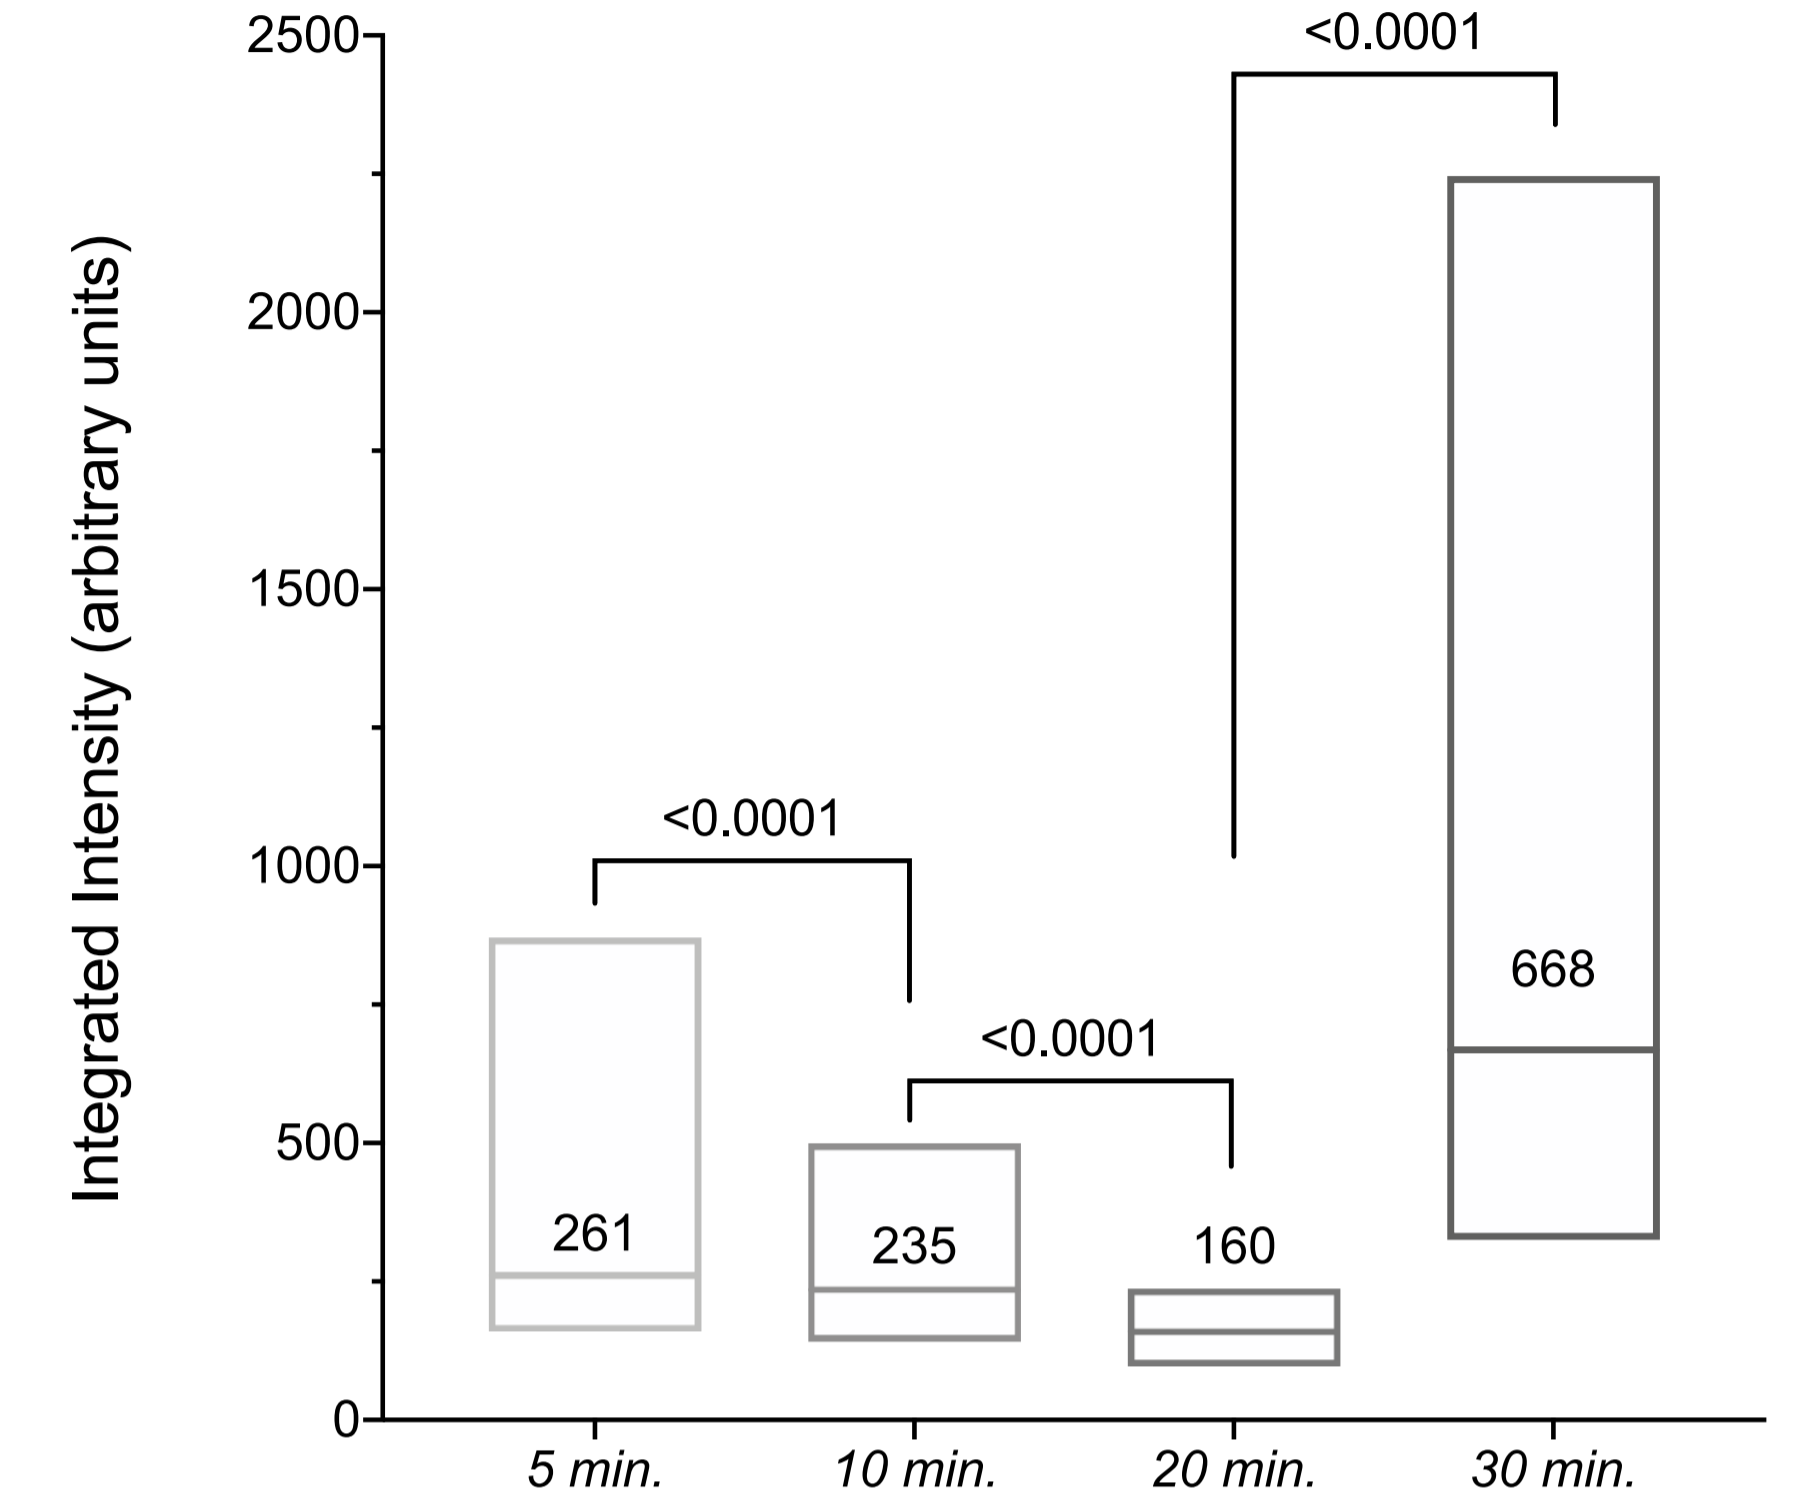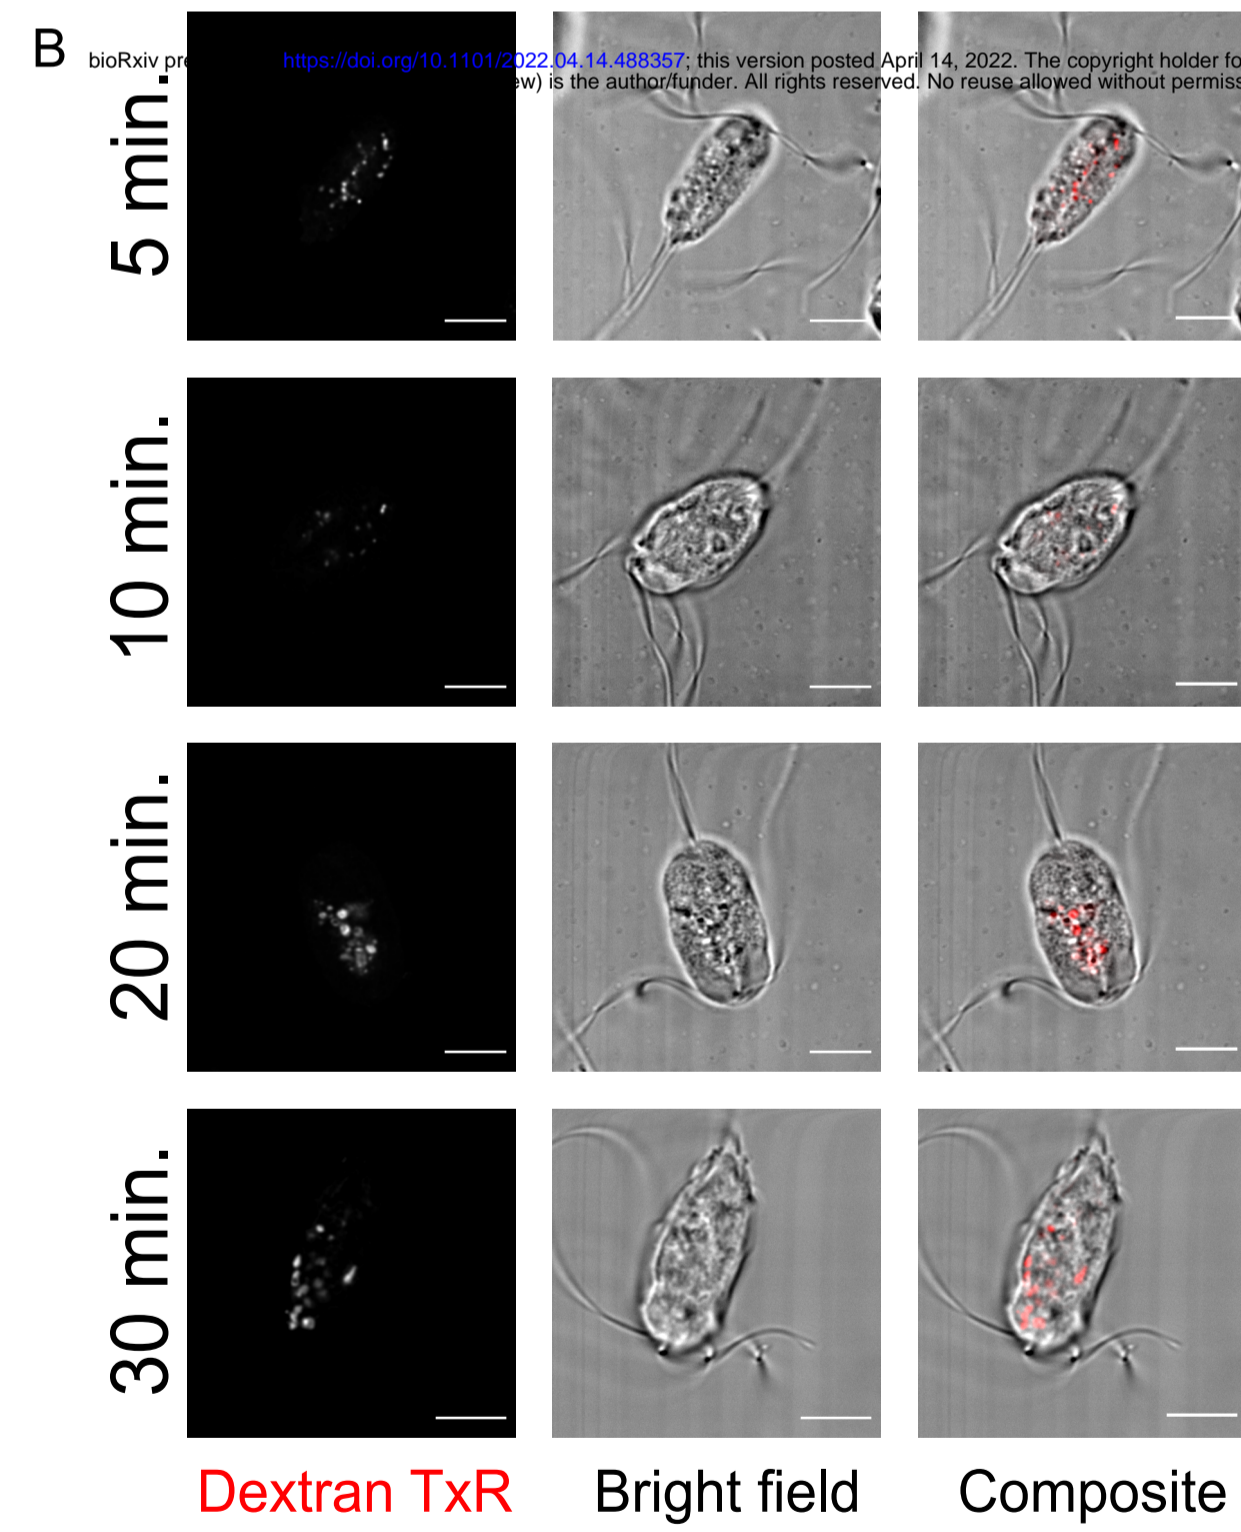

*S. vortens*

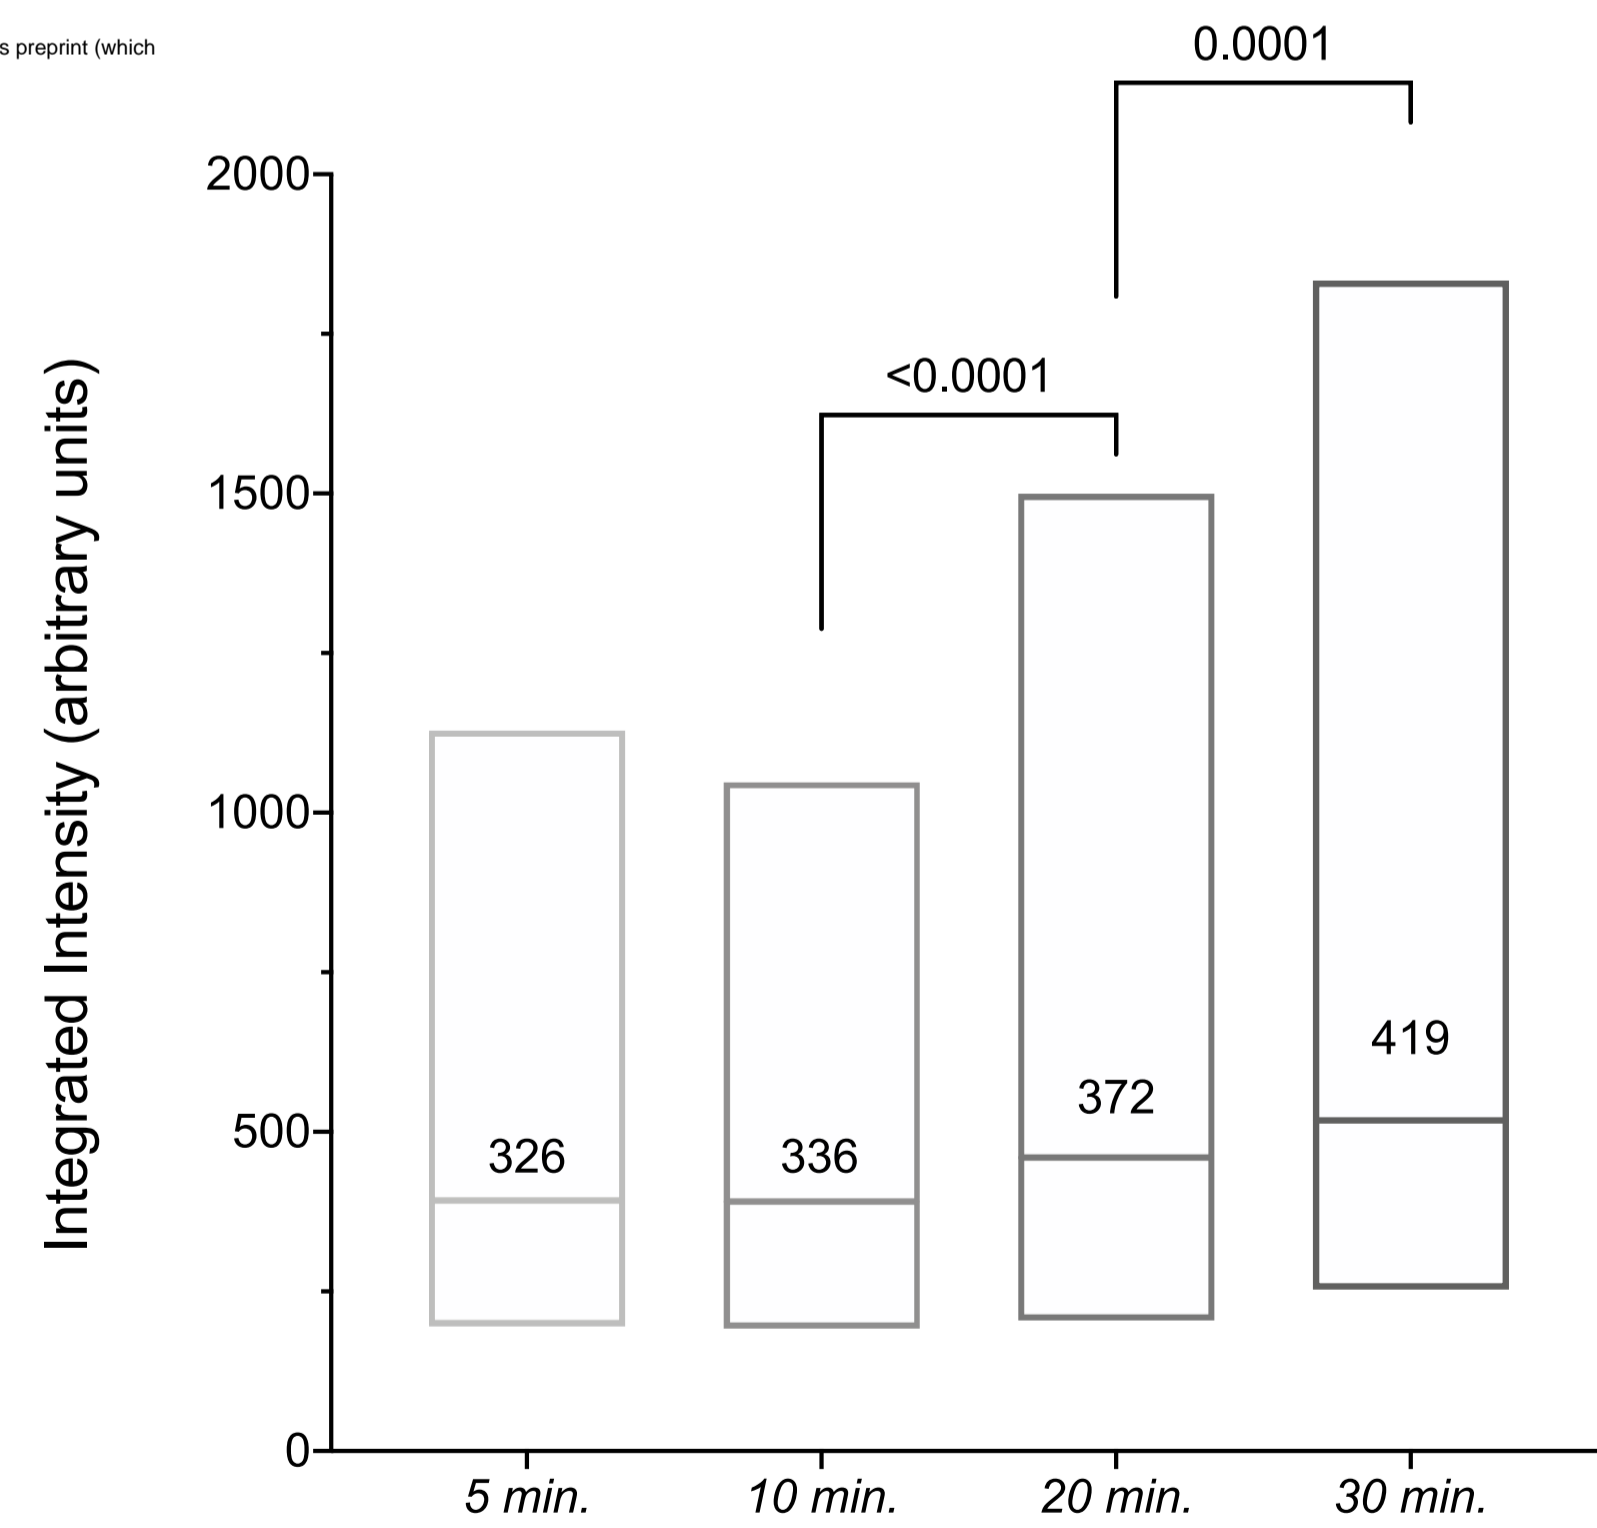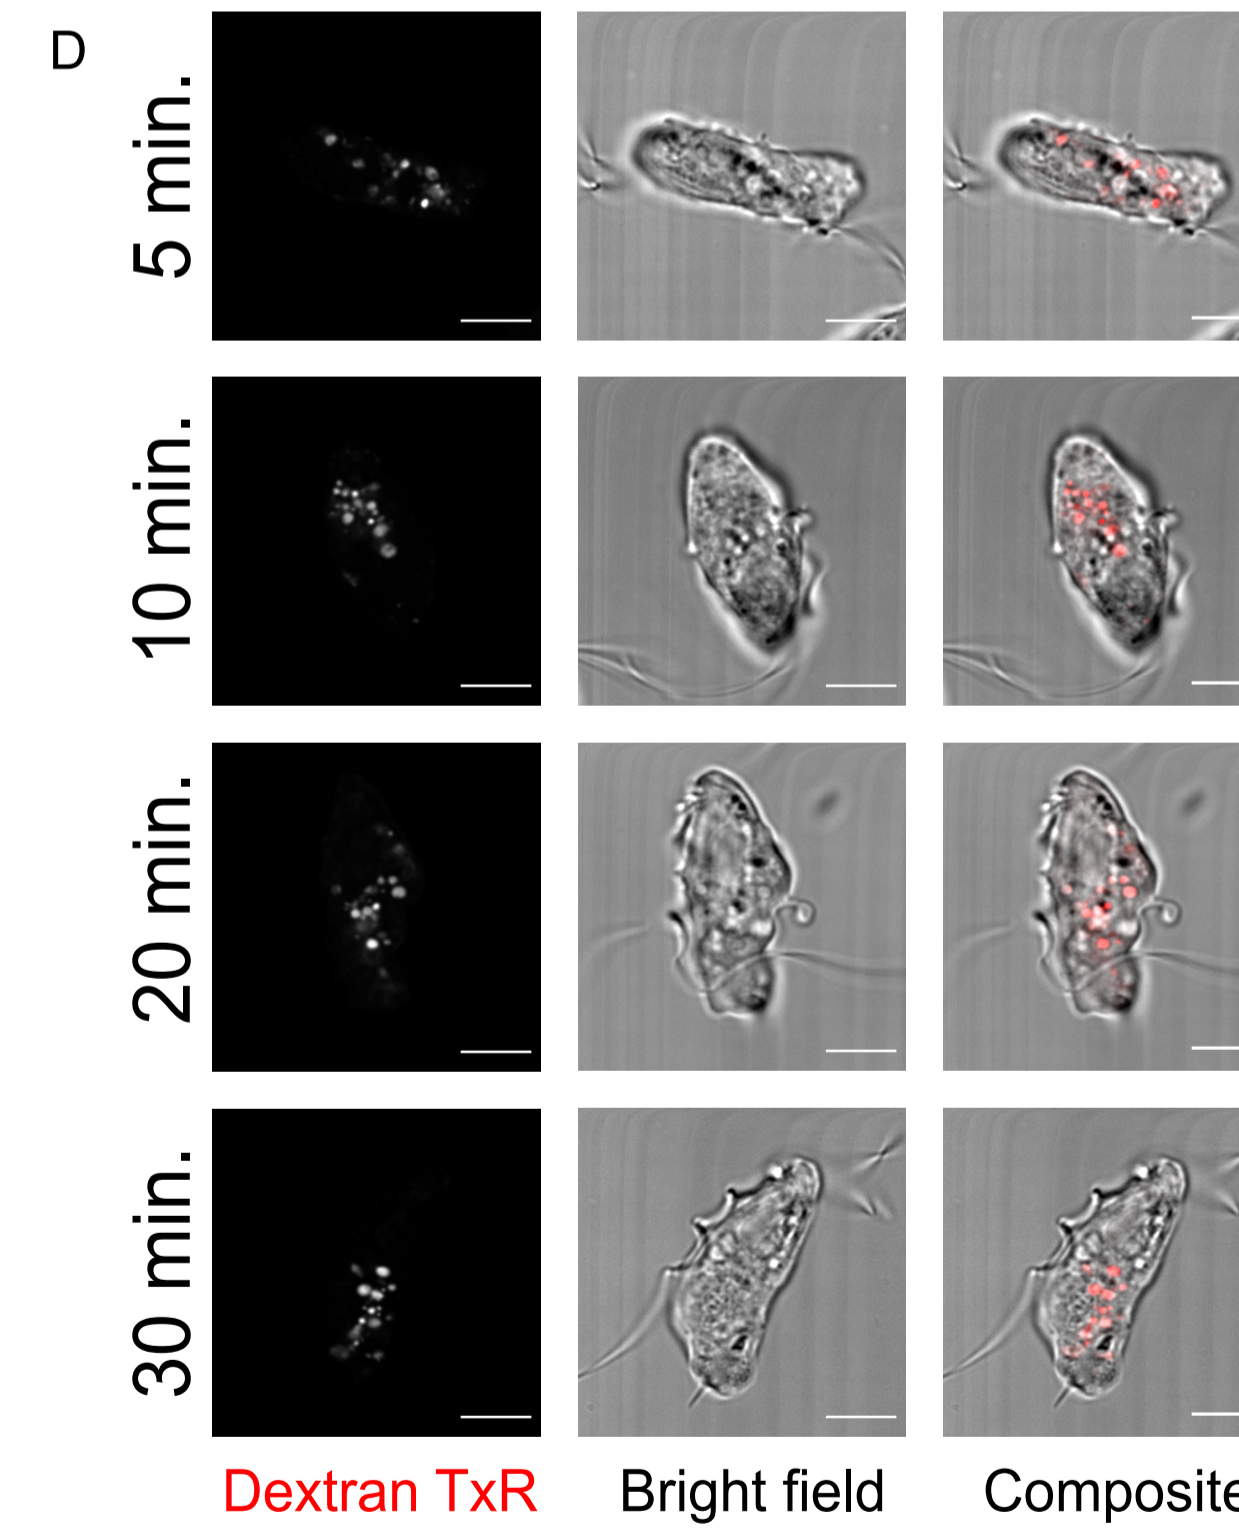

*T. foetus*

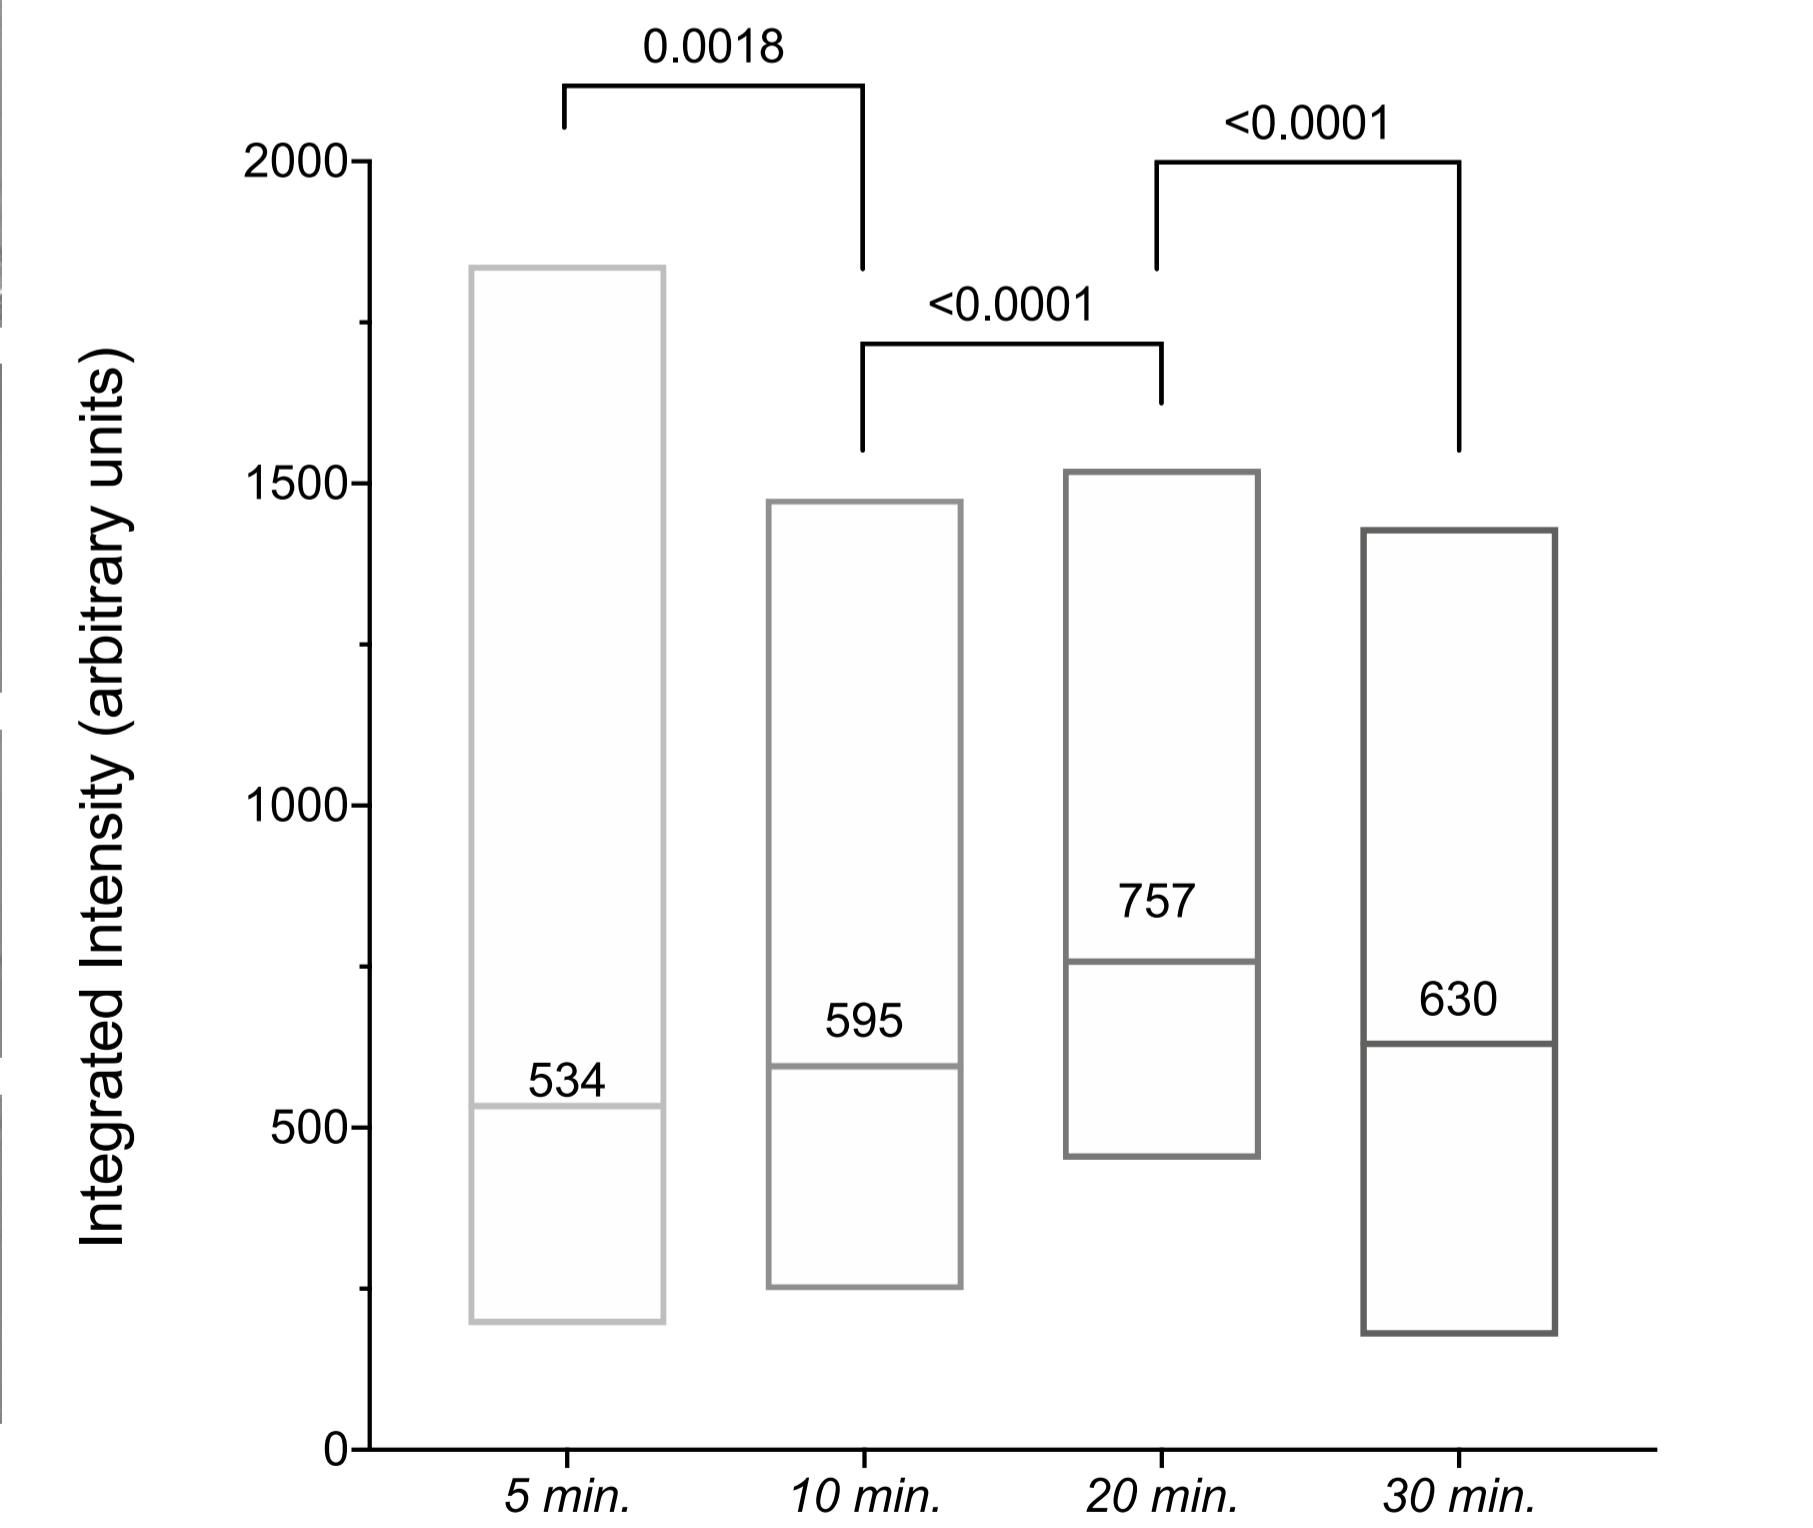

Figure 8

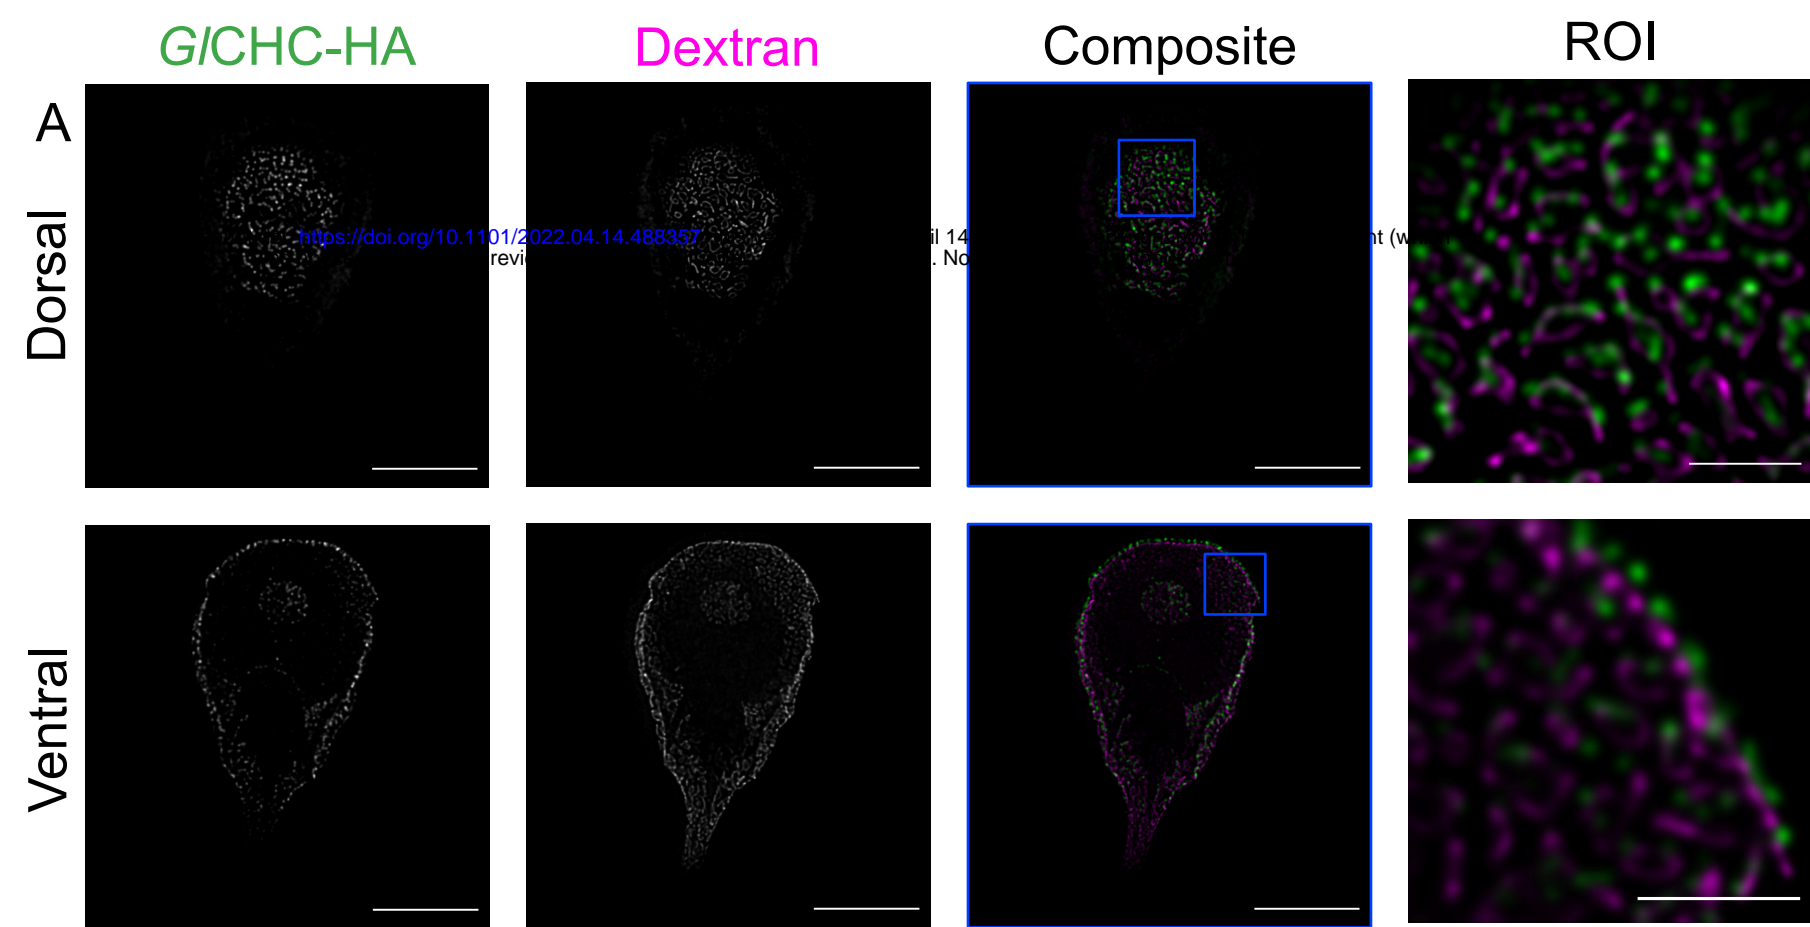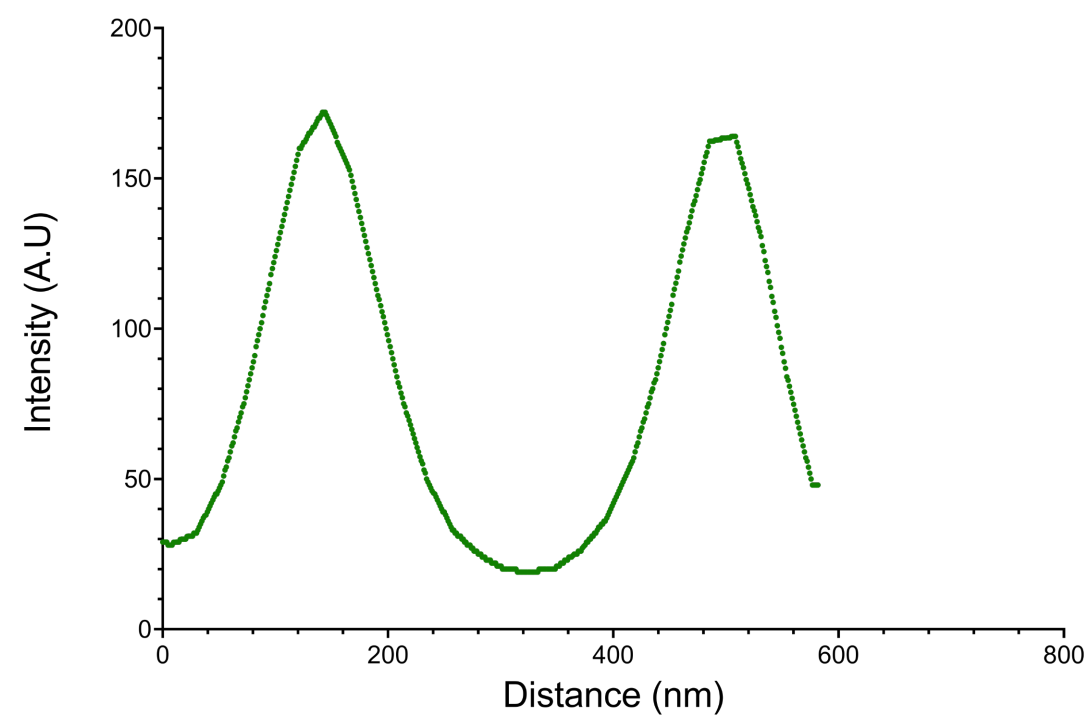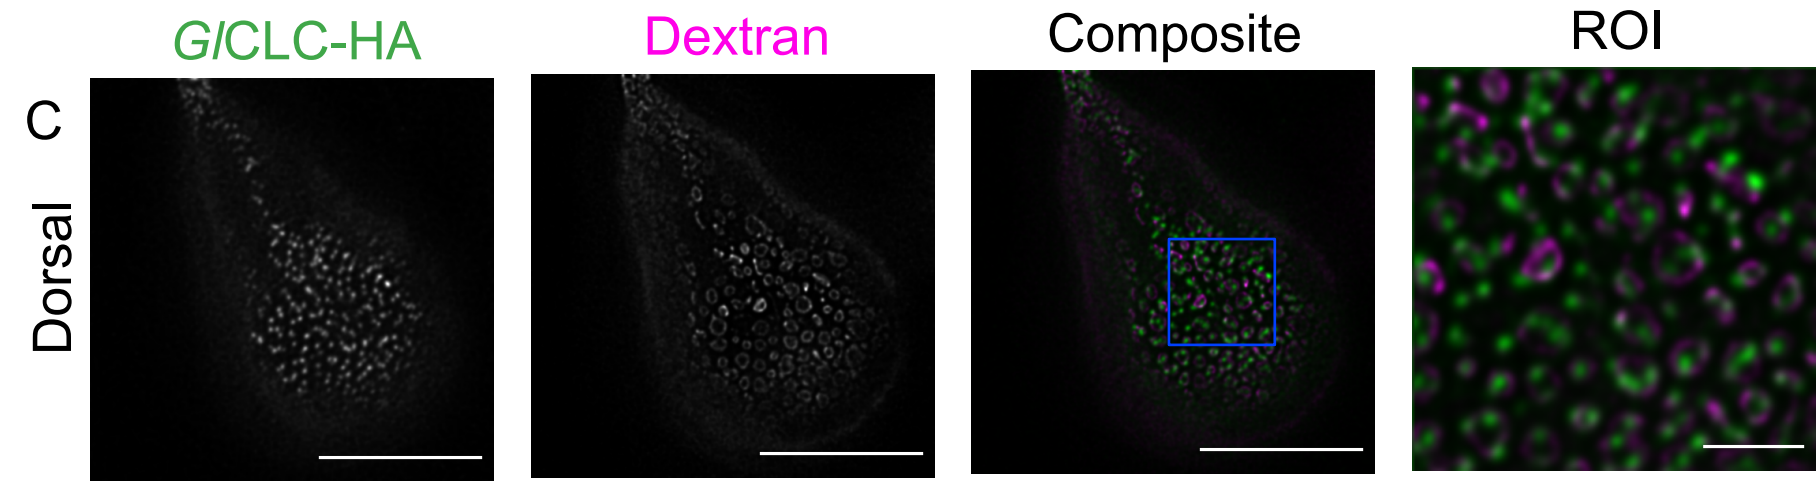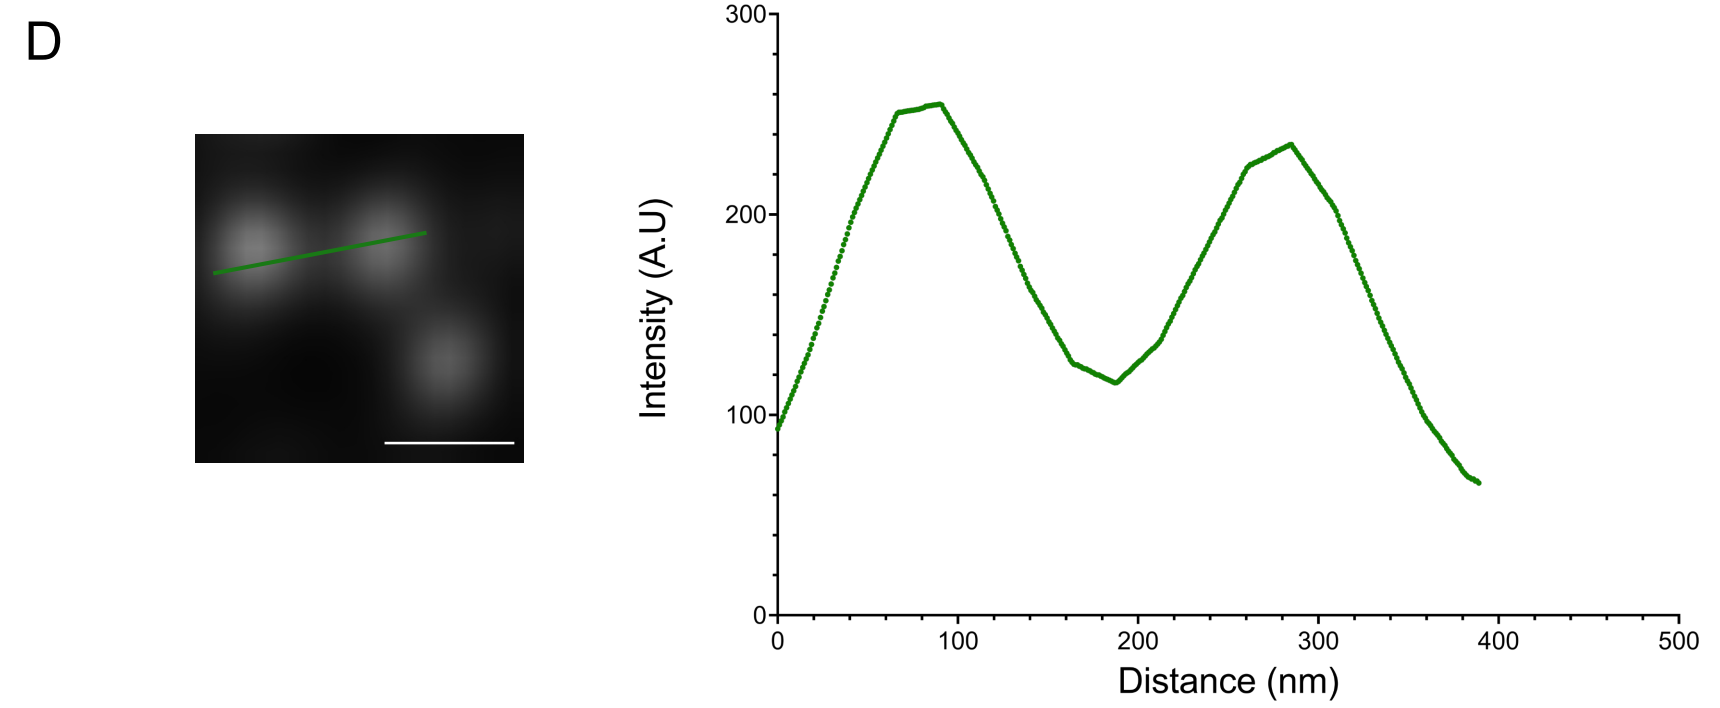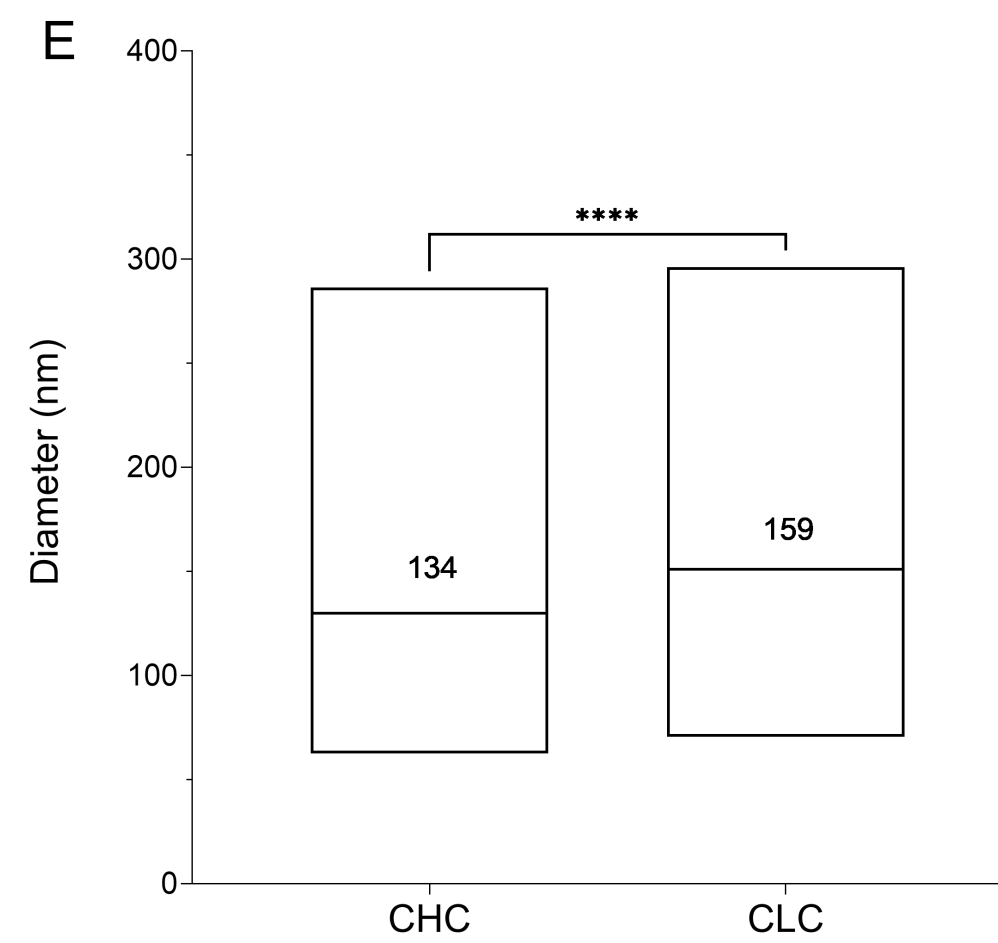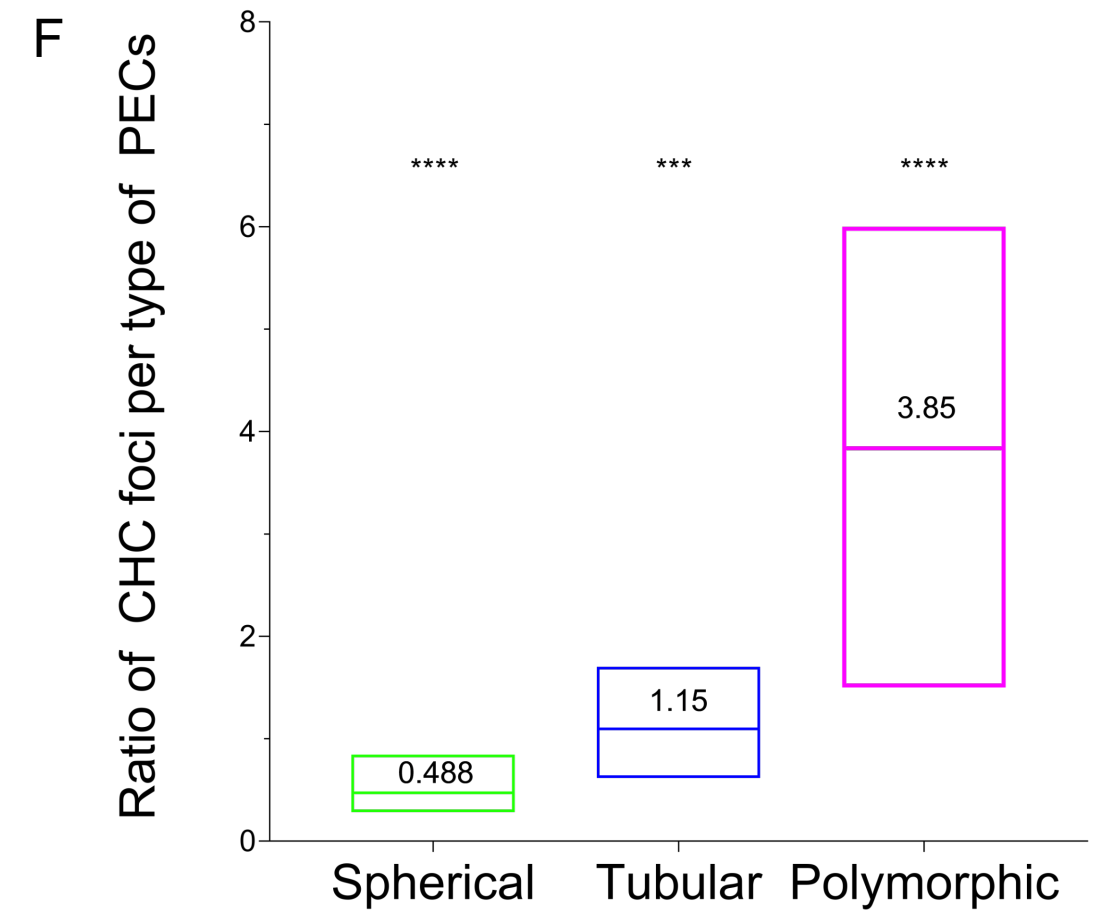

figure 9

A

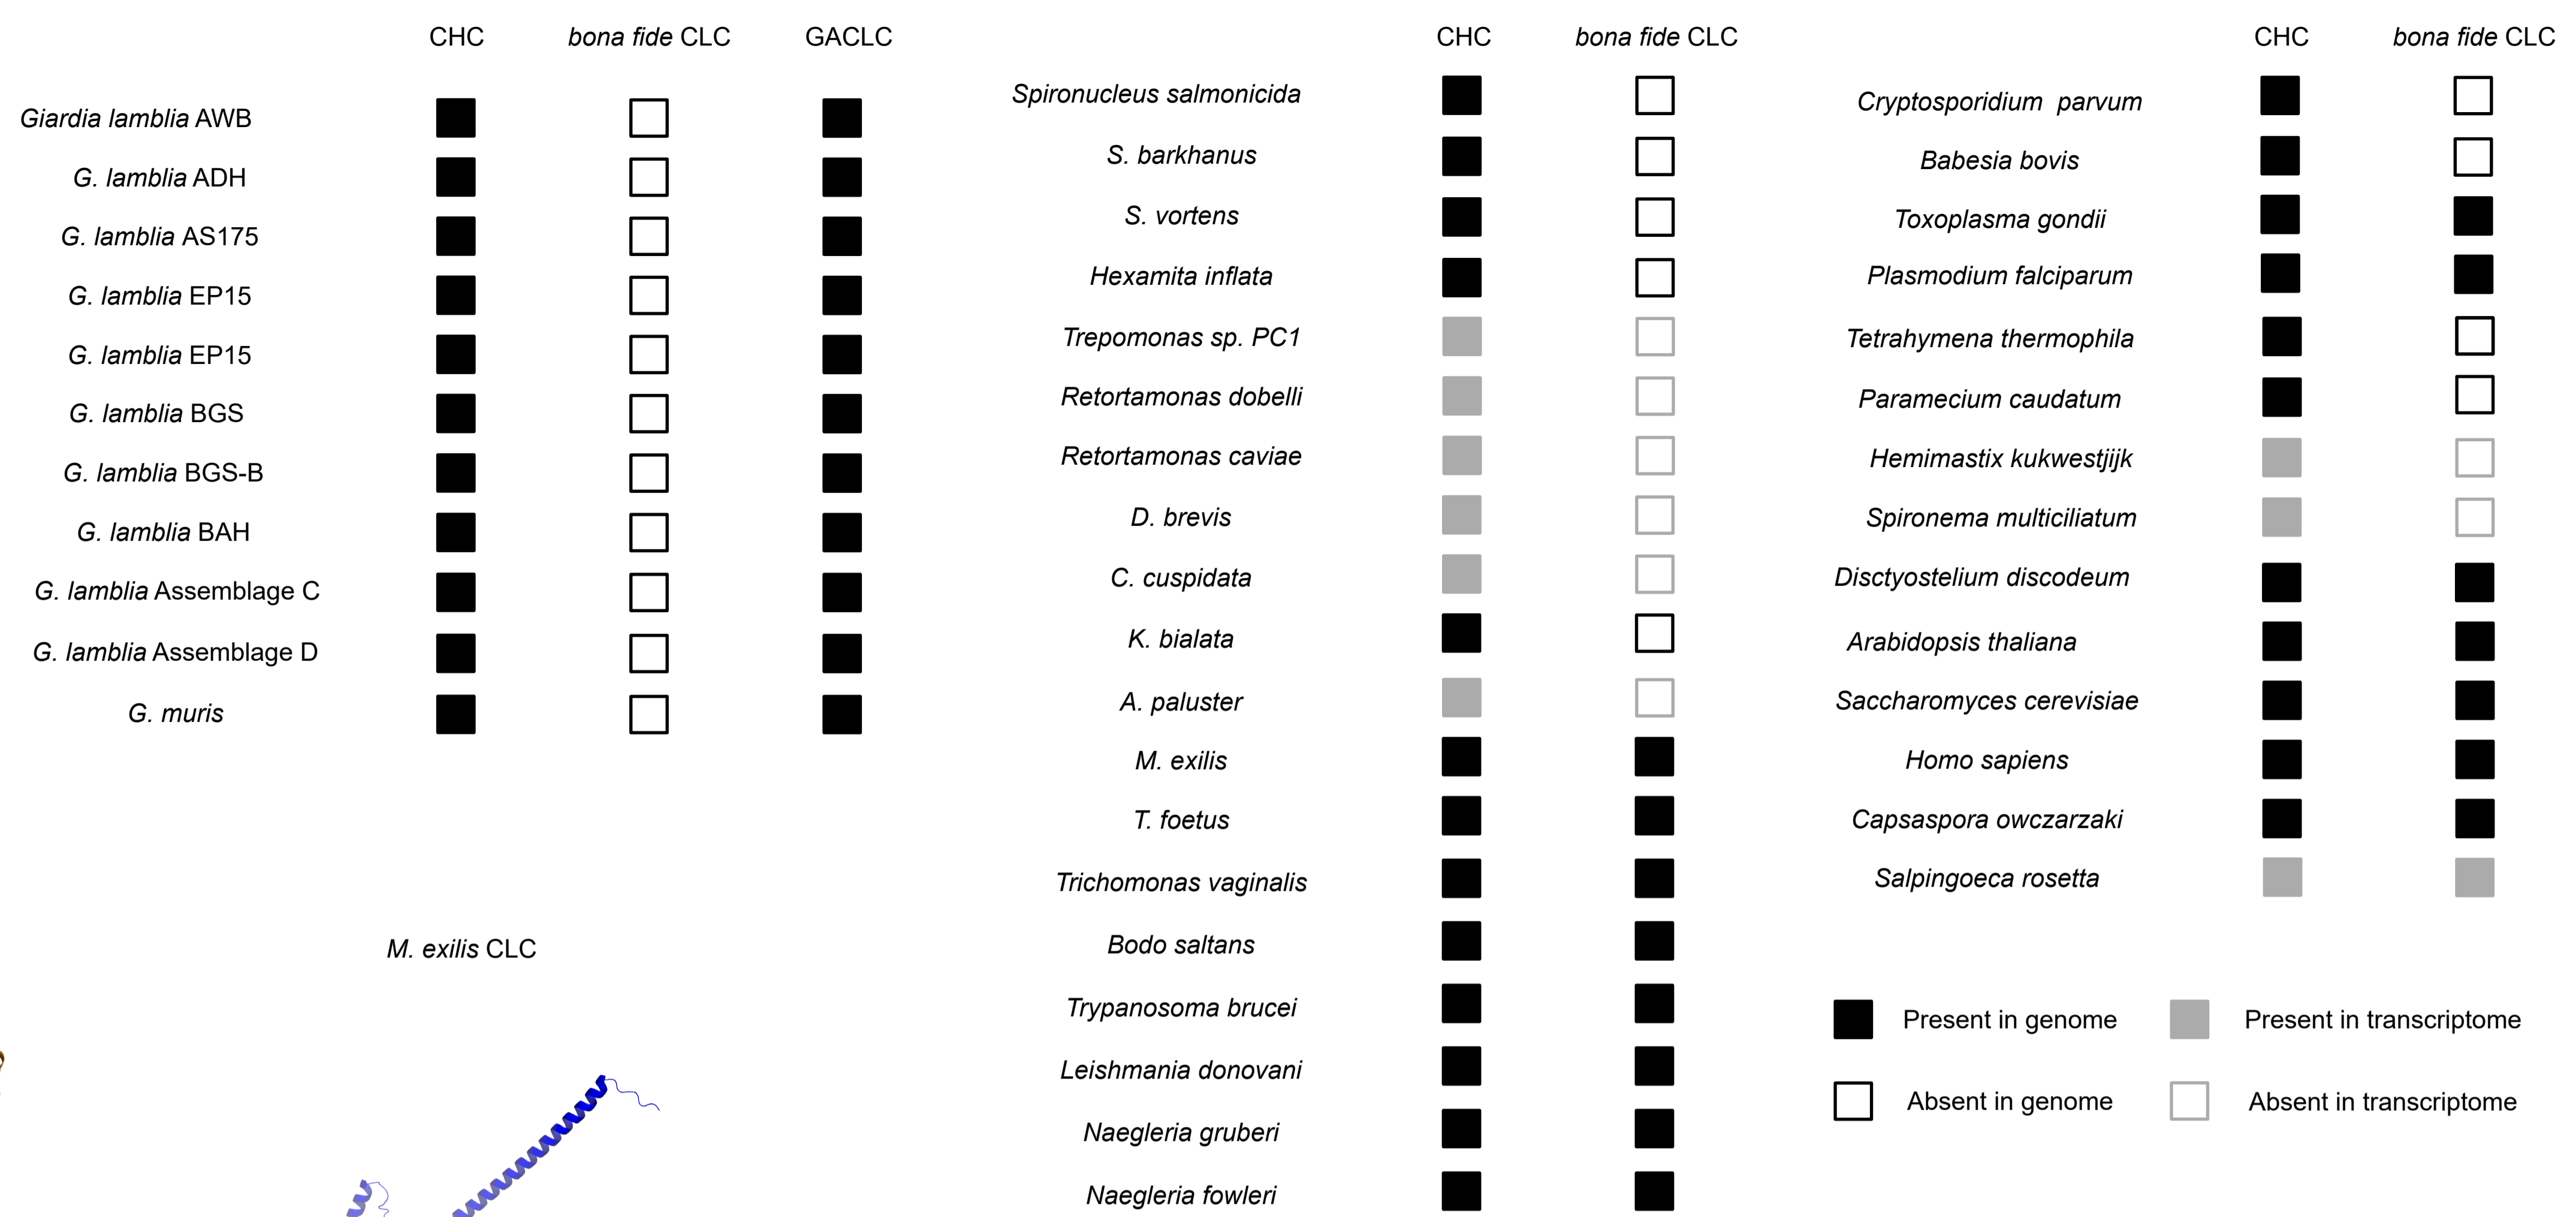

B

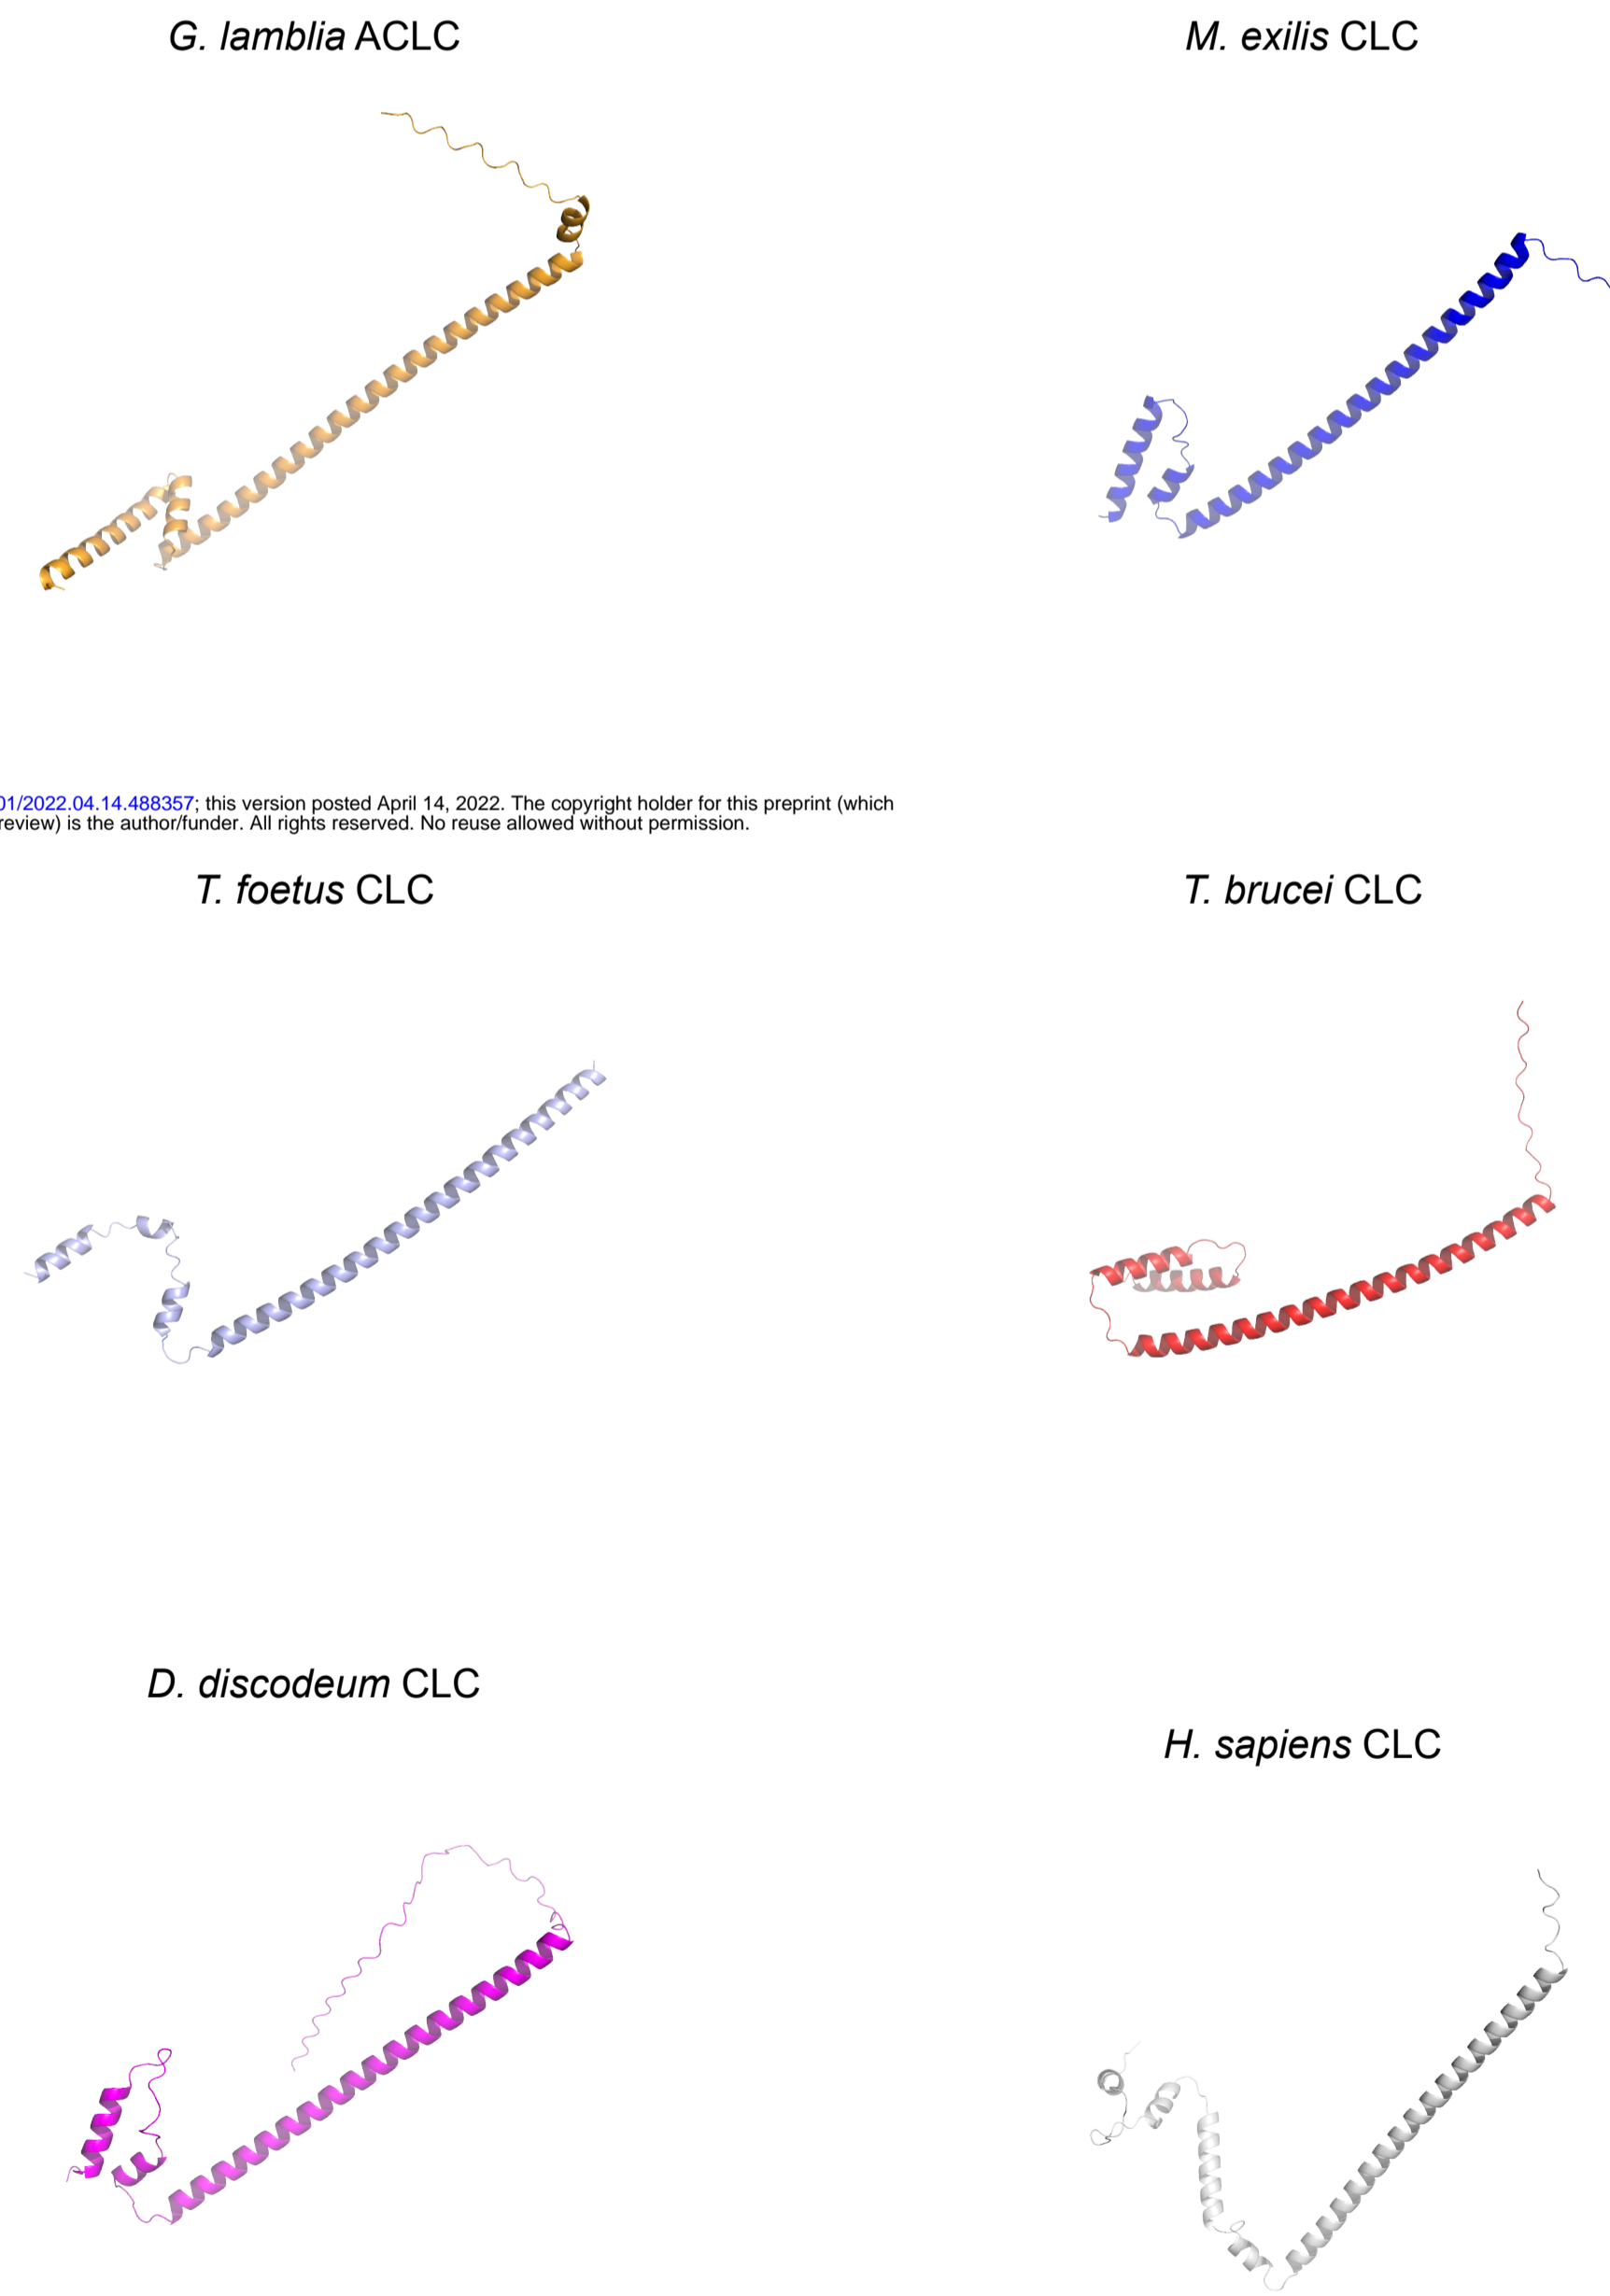

bioRxiv preprint doi: <https://doi.org/10.1101/2022.04.14.488357>; this version posted April 14, 2022. The copyright holder for this preprint (which was not certified by peer review) is the author/funder. All rights reserved. No reuse allowed without permission.

| Specie/TM-align     | <i>H. sapiens</i> | <i>D. discodeum</i> | <i>M. exilis</i> | <i>T. brucei</i> | <i>T. foetus</i> | <i>G. lamblia</i> |
|---------------------|-------------------|---------------------|------------------|------------------|------------------|-------------------|
| <i>H. sapiens</i>   | 1                 | 0.48716             | 0.44078          | 0.41651          | 0.46168          | 0.48174           |
| <i>D. discodeum</i> | 0.48716           | 1                   | 0.57744          | 0.47487          | 0.49614          | 0.51481           |
| <i>M. exilis</i>    | 0.44078           | 0.57744             | 1                | 0.4525           | 0.45185          | 0.51904           |
| <i>T. brucei</i>    | 0.41651           | 0.47487             | 0.4525           | 1                | 0.54812          | 0.47487           |
| <i>T. foetus</i>    | 0.46168           | 0.49614             | 0.45185          | 0.54812          | 1                | 0.59364           |
| <i>G. lamblia</i>   | 0.48174           | 0.51481             | 0.51904          | 0.47487          | 0.59364          | 1                 |

| Specie/RMSD (Å)     | <i>H. sapiens</i> | <i>D. discodeum</i> | <i>M. exilis</i> | <i>T. brucei</i> | <i>T. foetus</i> | <i>G. lamblia</i> |
|---------------------|-------------------|---------------------|------------------|------------------|------------------|-------------------|
| <i>H. sapiens</i>   | 0                 | 4.338               | 6.205            | 4.581            | 5.821            | 4.979             |
| <i>D. discodeum</i> | 4.338             | 0                   | 3.08             | 10.905           | 3.718            | 6.231             |
| <i>M. exilis</i>    | 6.205             | 3.08                | 0                | 5.286            | 3.067            | 6.205             |
| <i>T. brucei</i>    | 4.581             | 10.905              | 5.286            | 0                | 5.492            | 6.173             |
| <i>T. foetus</i>    | 5.821             | 3.718               | 3.067            | 5.492            | 0                | 4.74              |
| <i>G. lamblia</i>   | 4.979             | 6.231               | 6.205            | 6.173            | 4.74             | 0                 |

A

*Giardia lamblia*  
Giardiinae

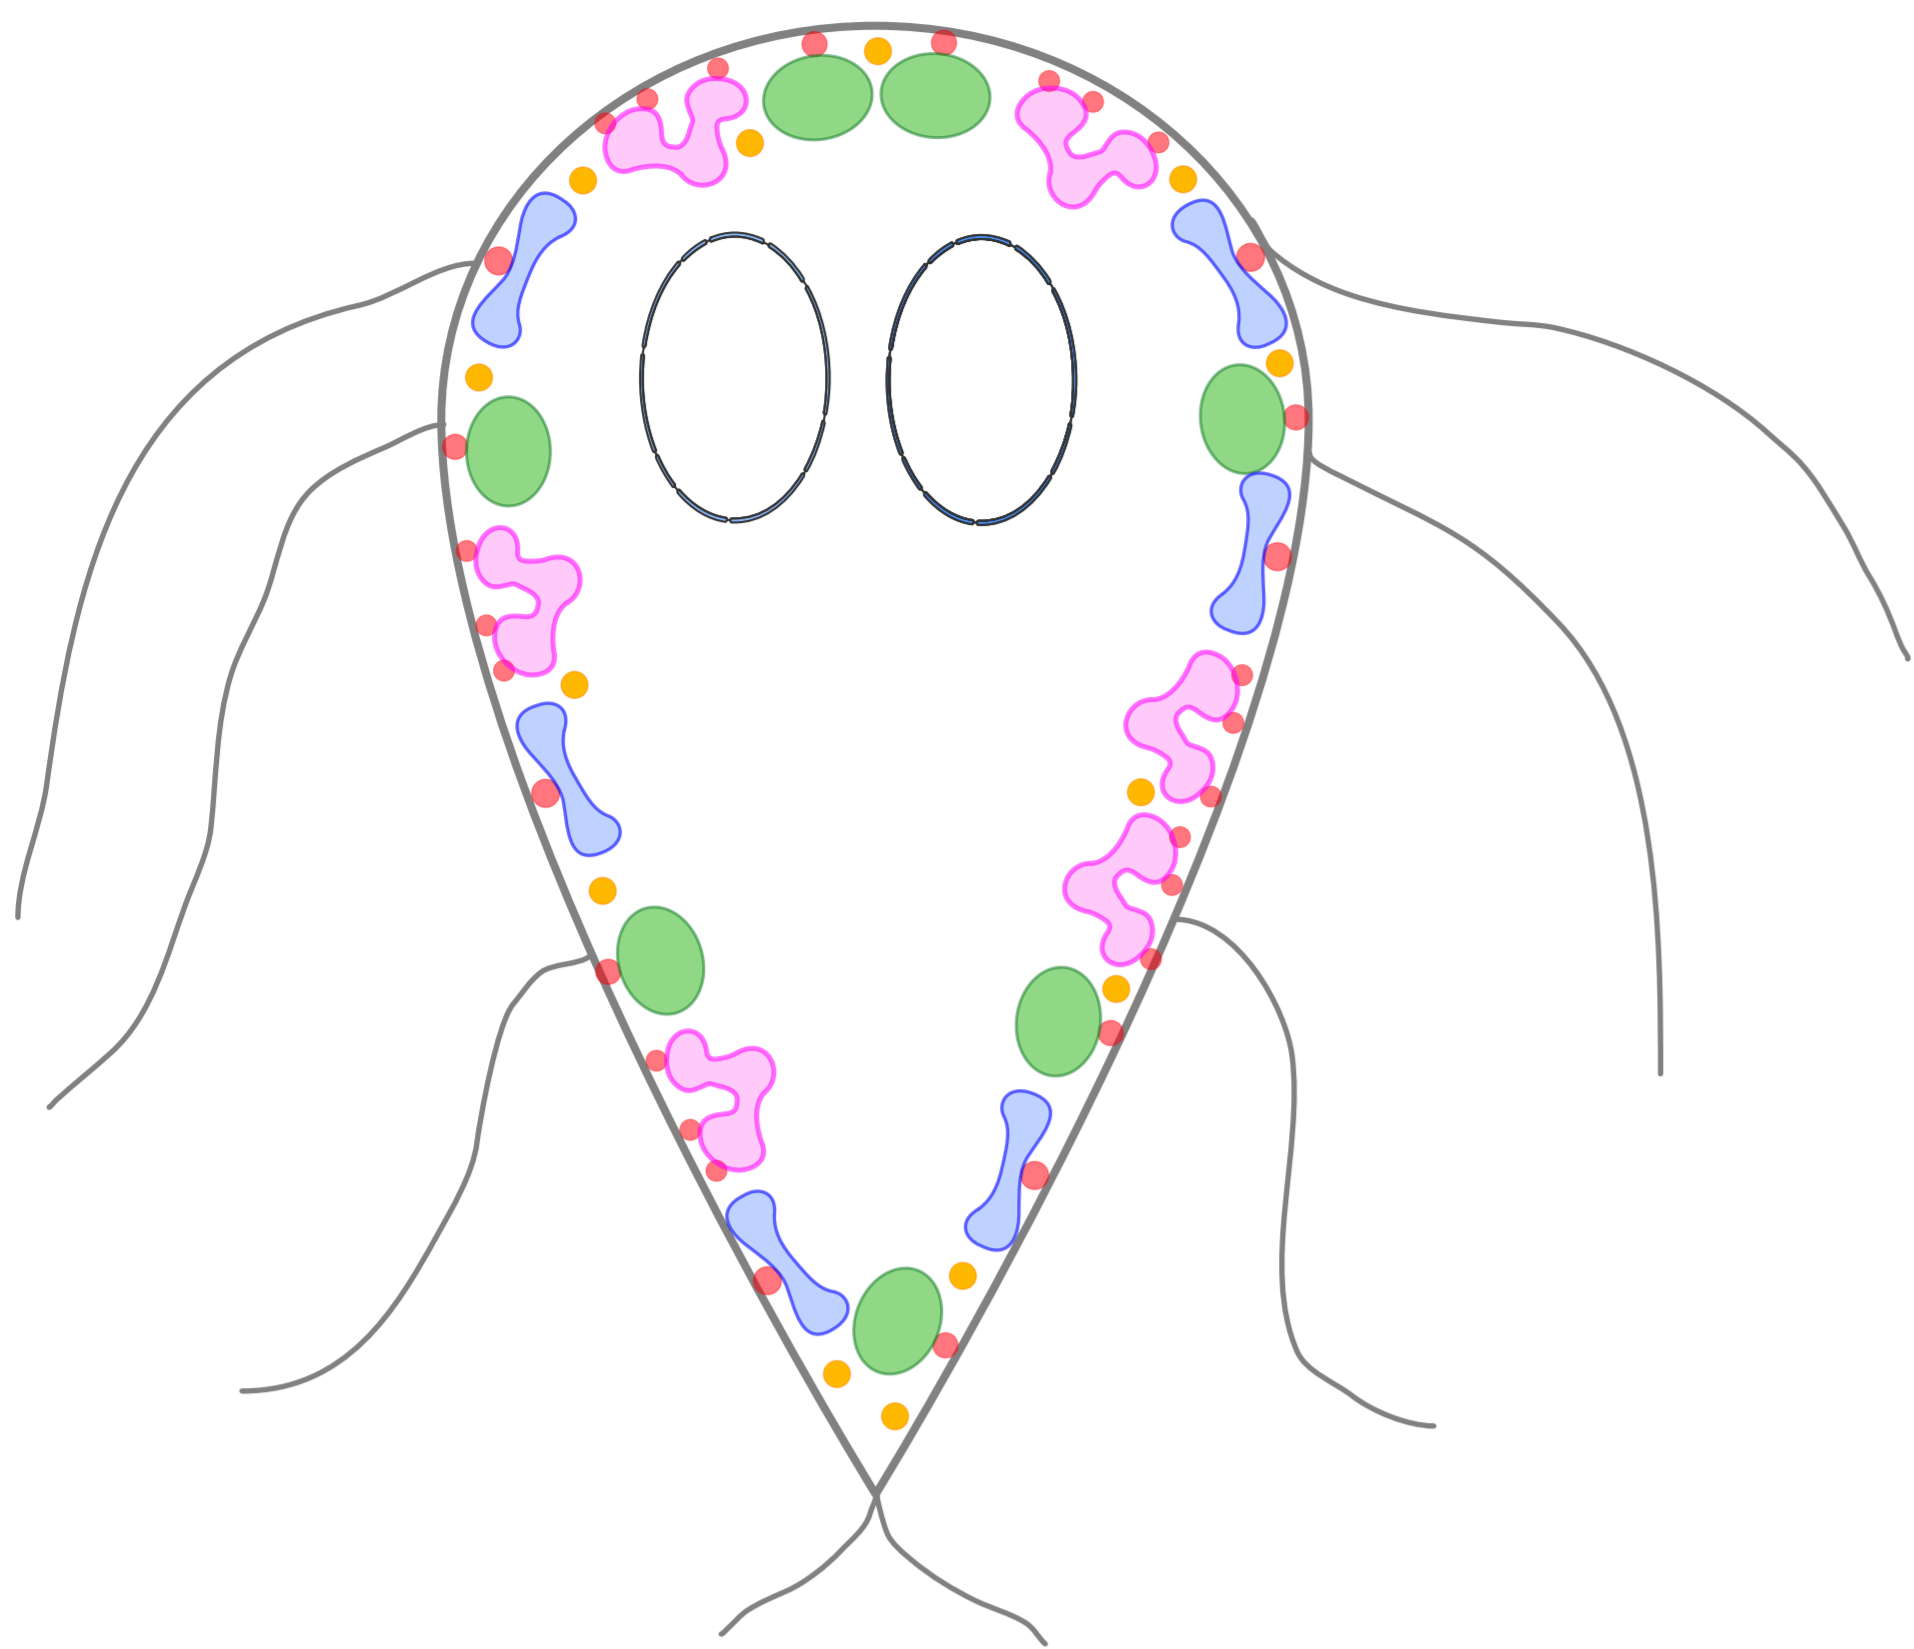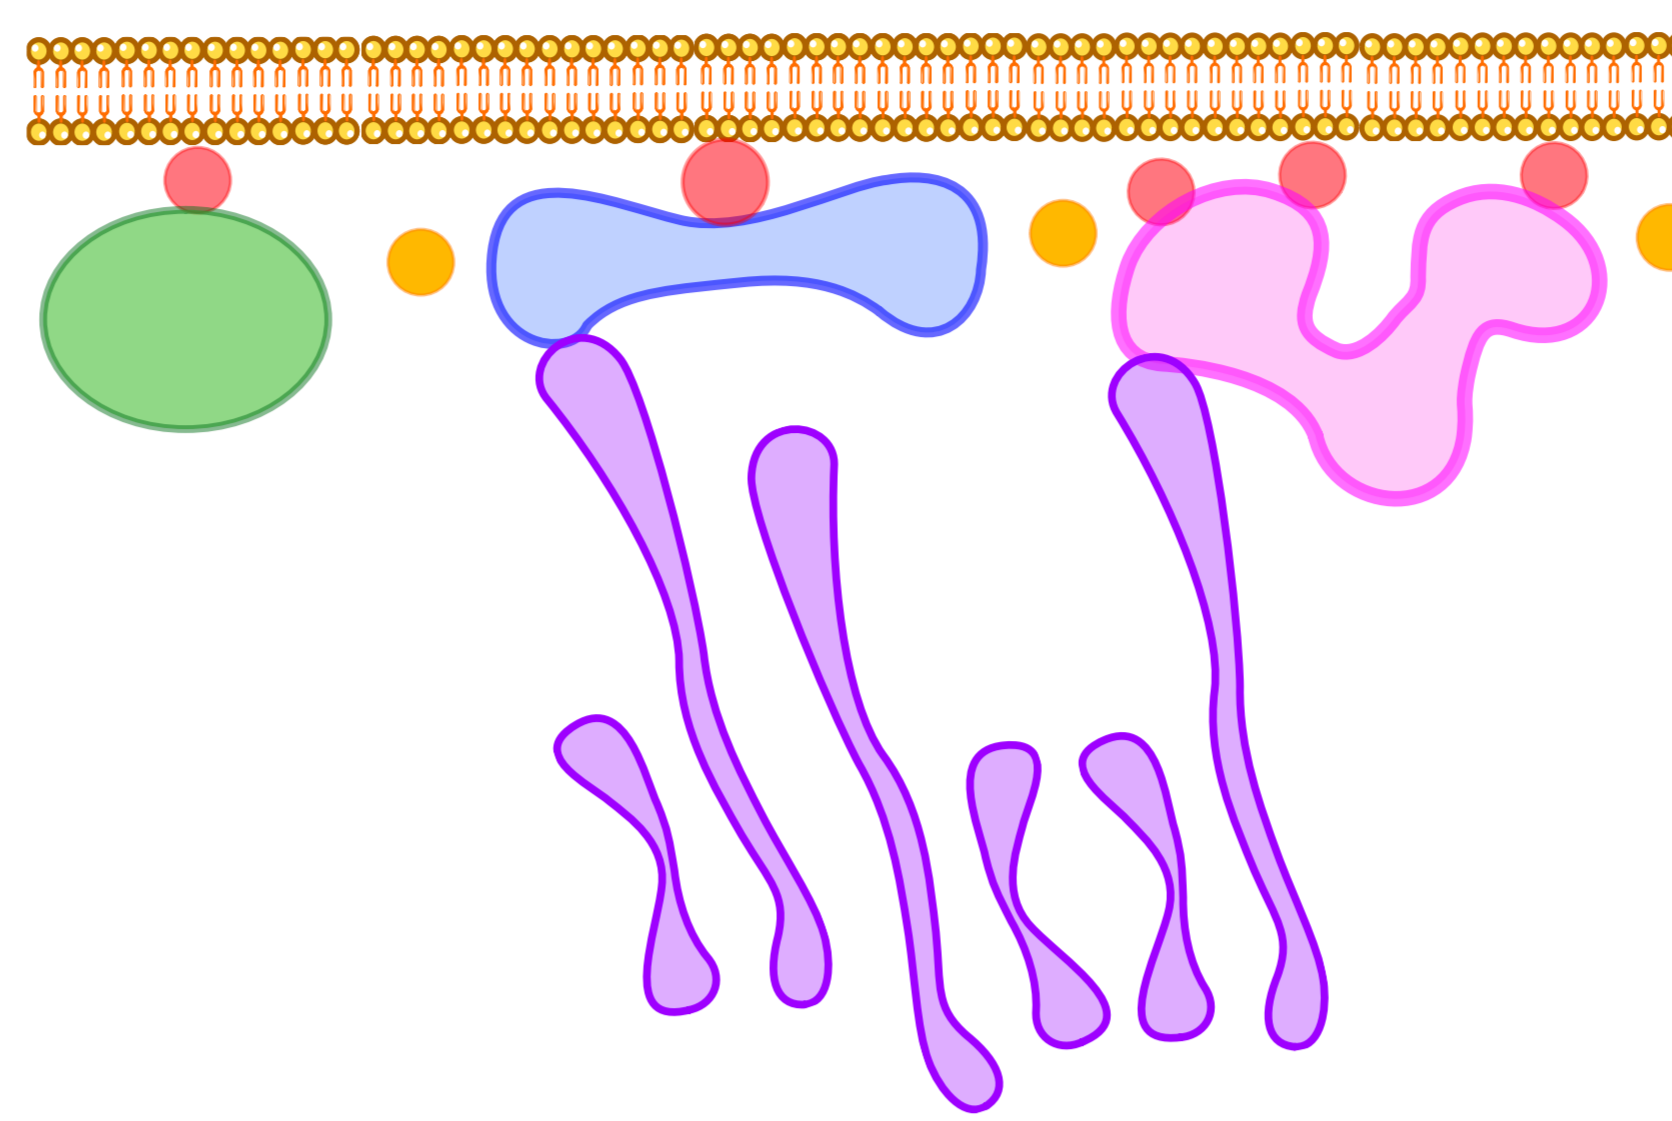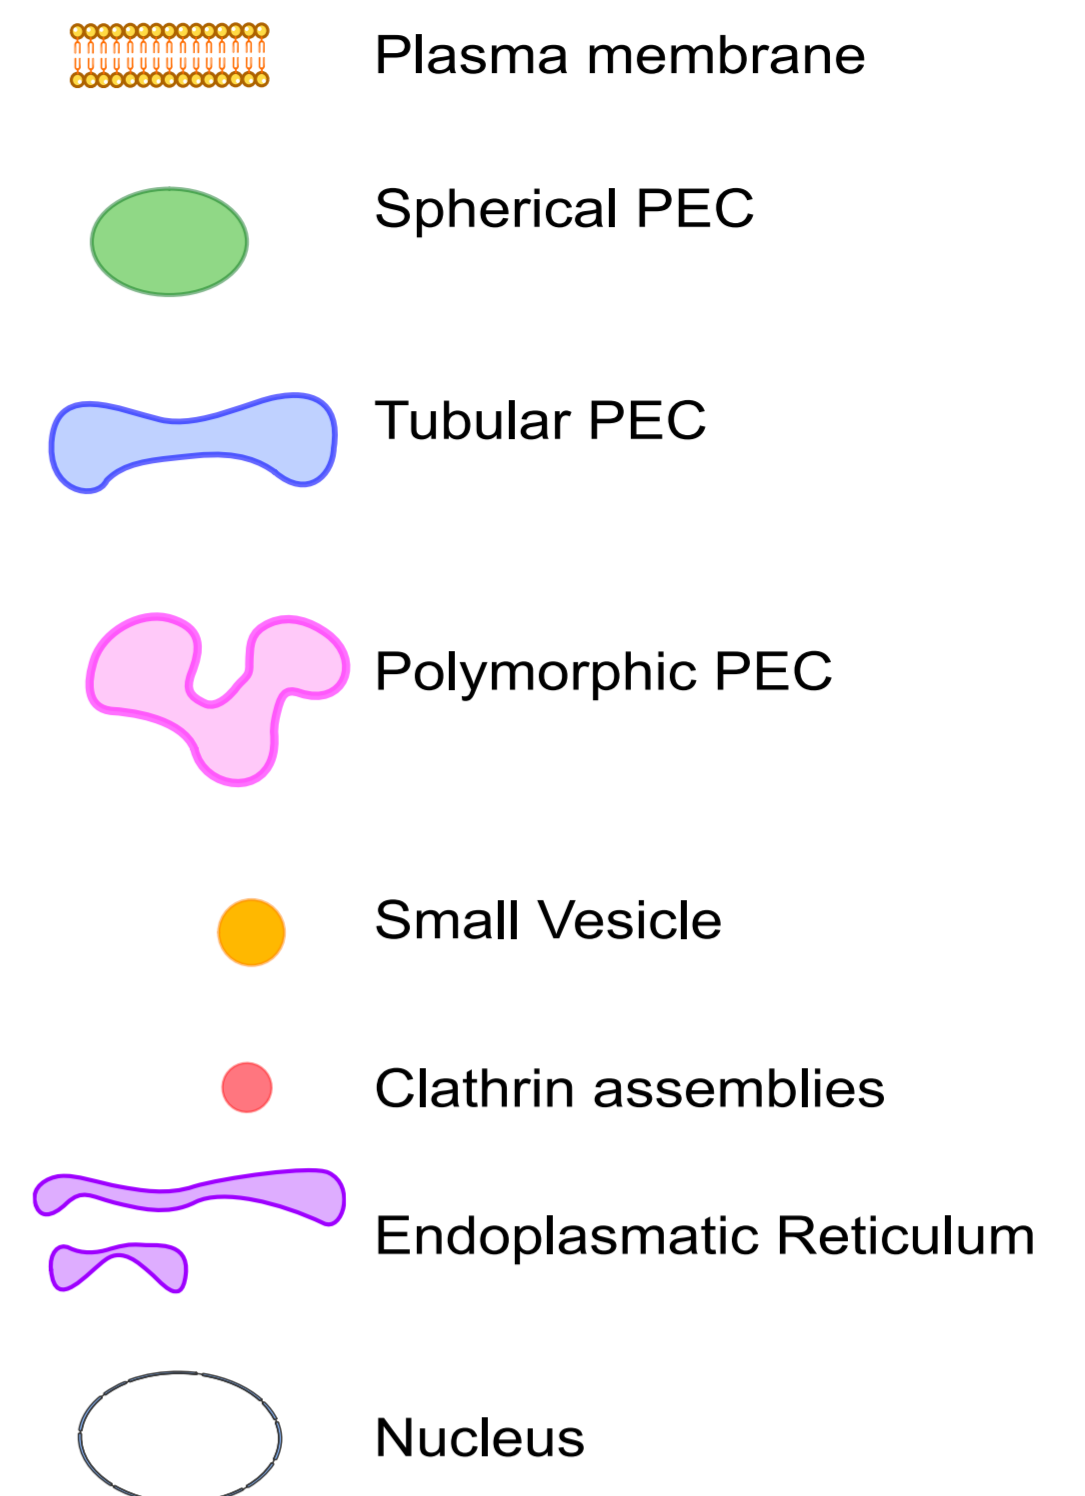

*Spirionucleus* sp.  
Hexamitidae

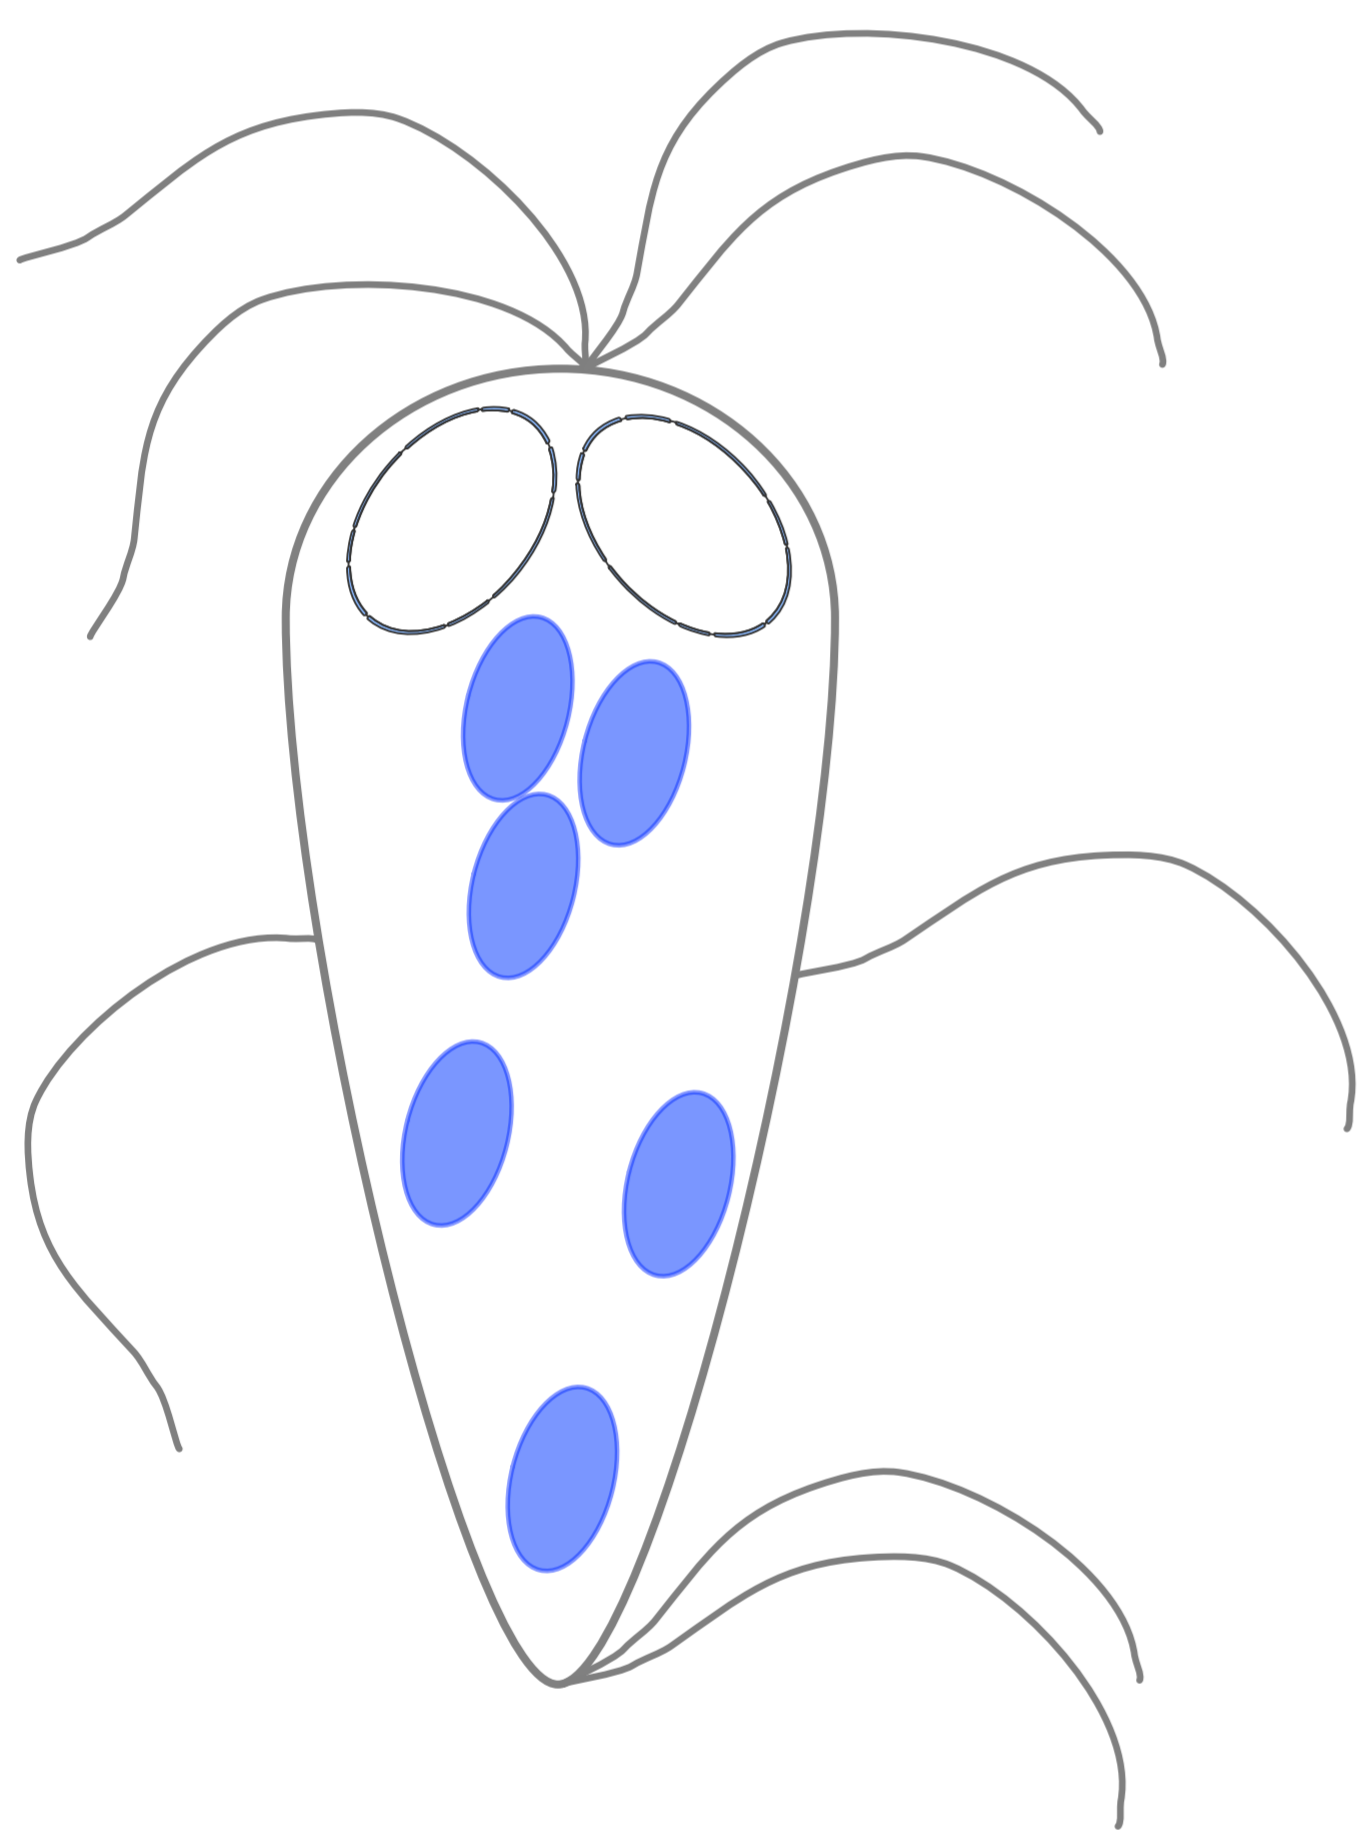

*Tritrichomonas foetus*  
Parabasalia

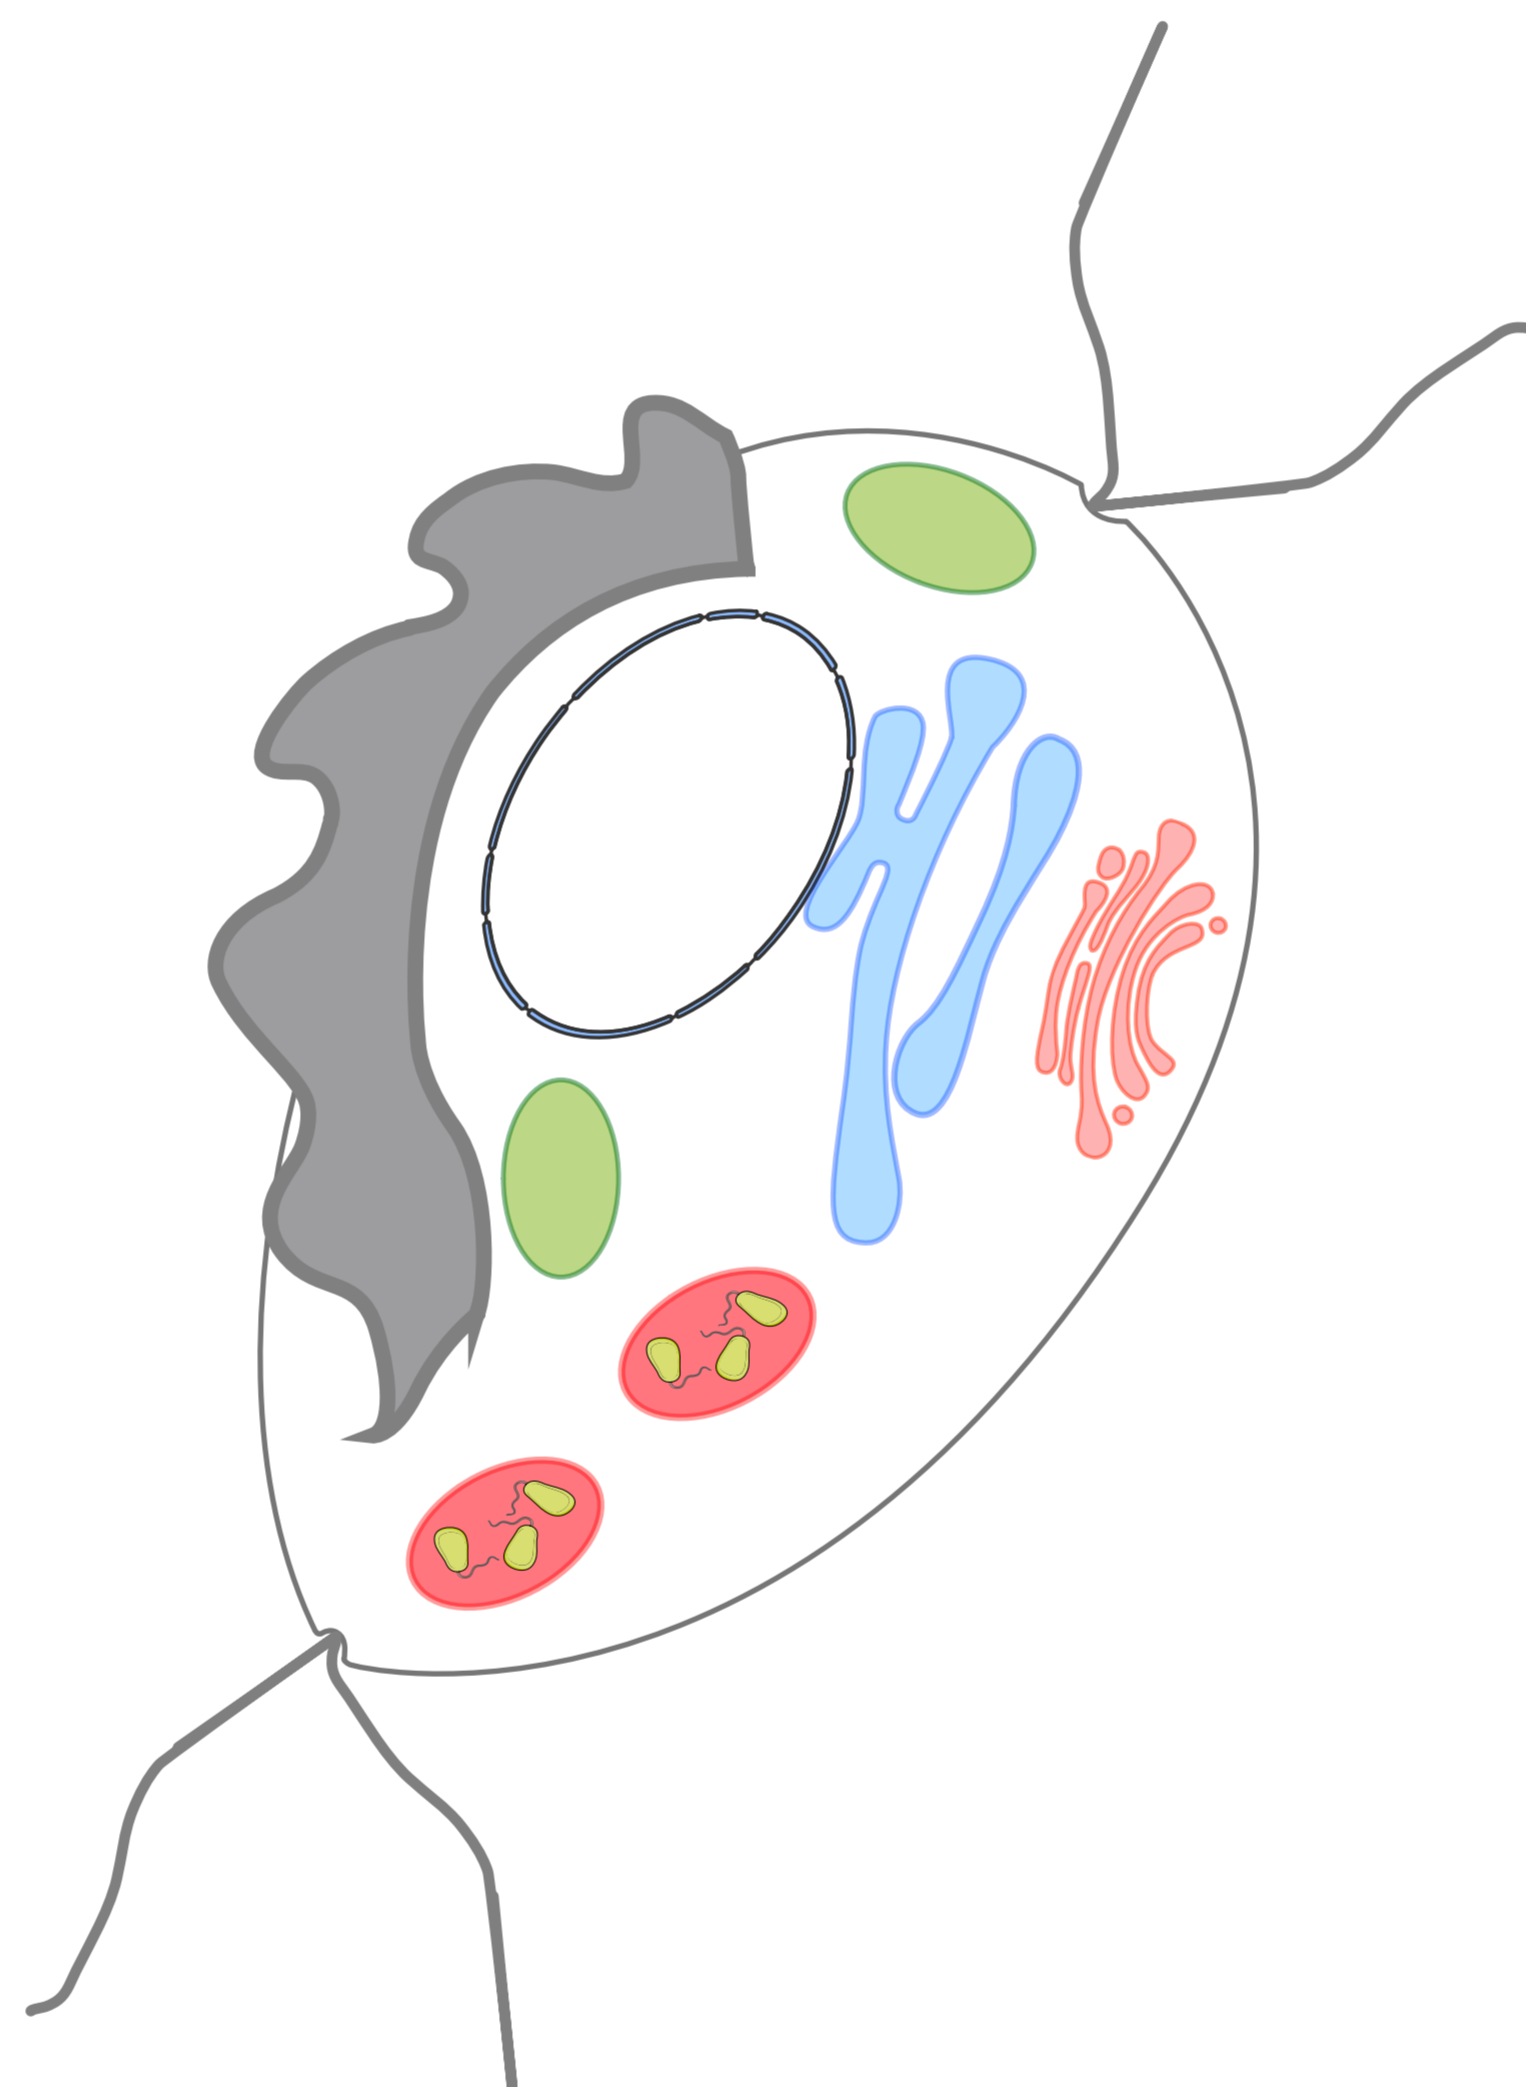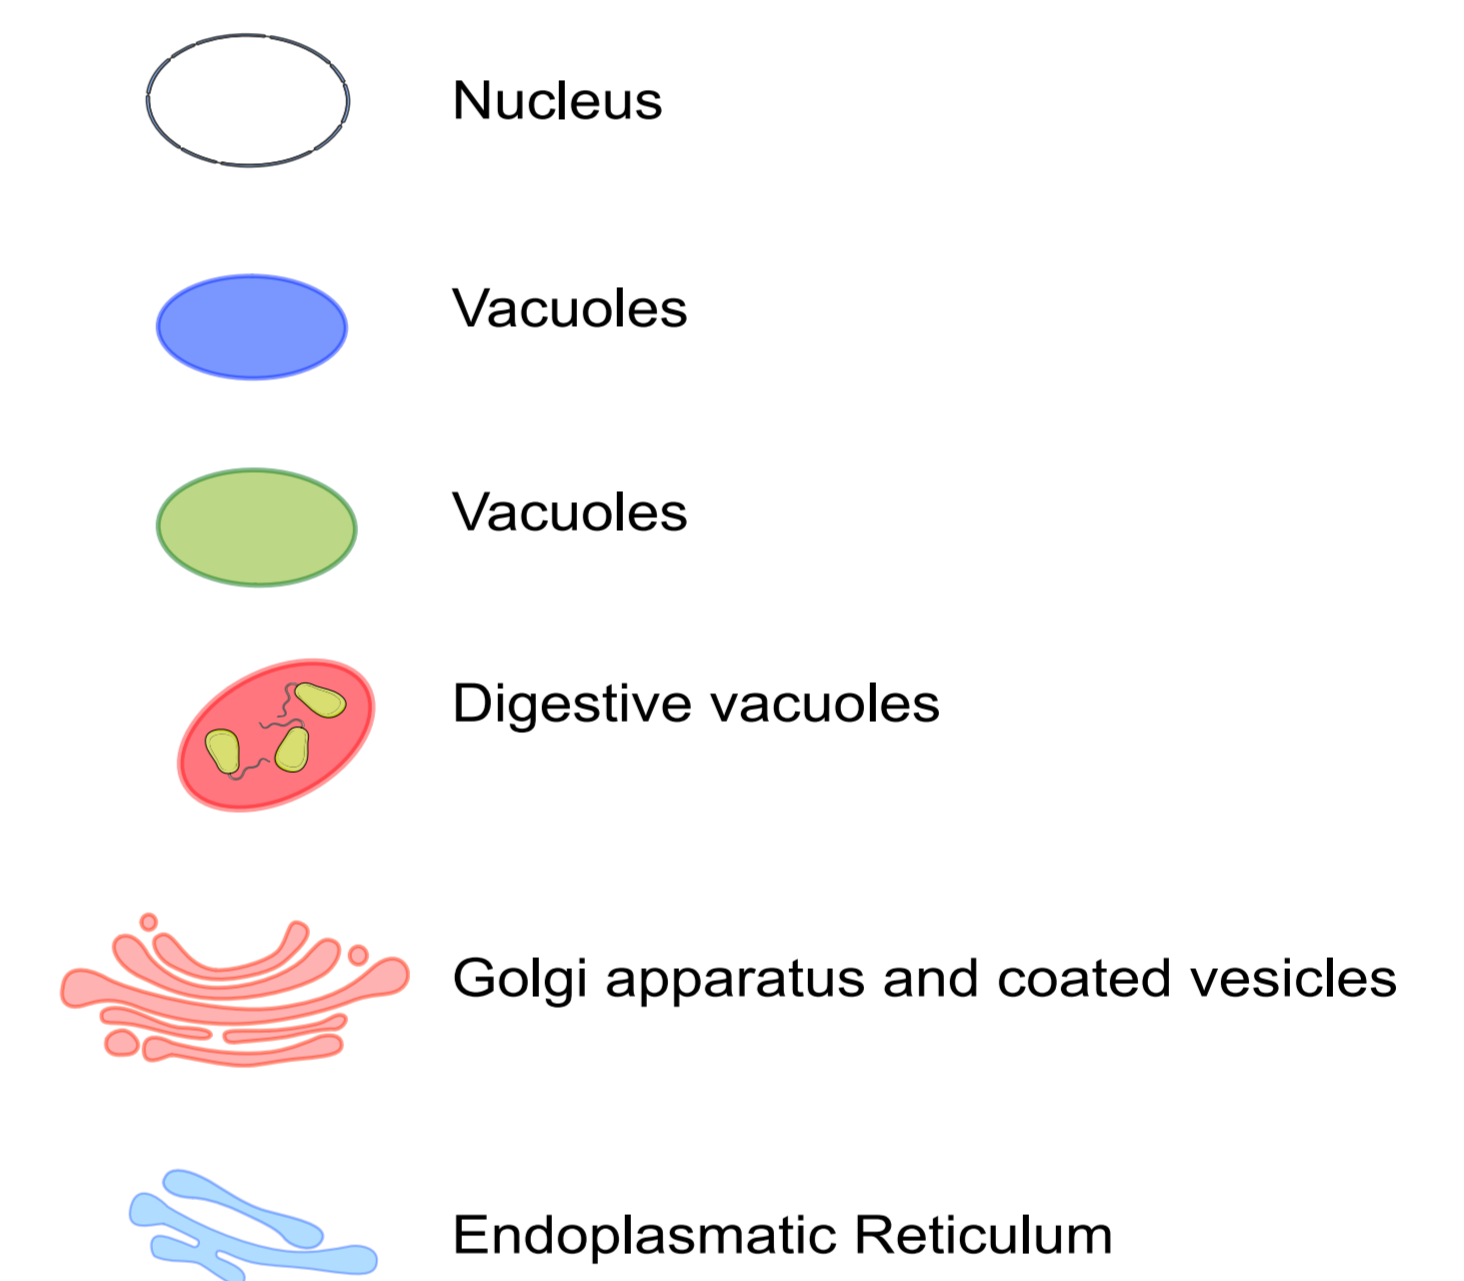

bioRxiv preprint doi: <https://doi.org/10.1101/2022.04.14.488357>; this version posted April 14, 2022. The copyright holder for this preprint (which was not certified by peer review) is the author/funder. All rights reserved. No reuse allowed without permission.

B

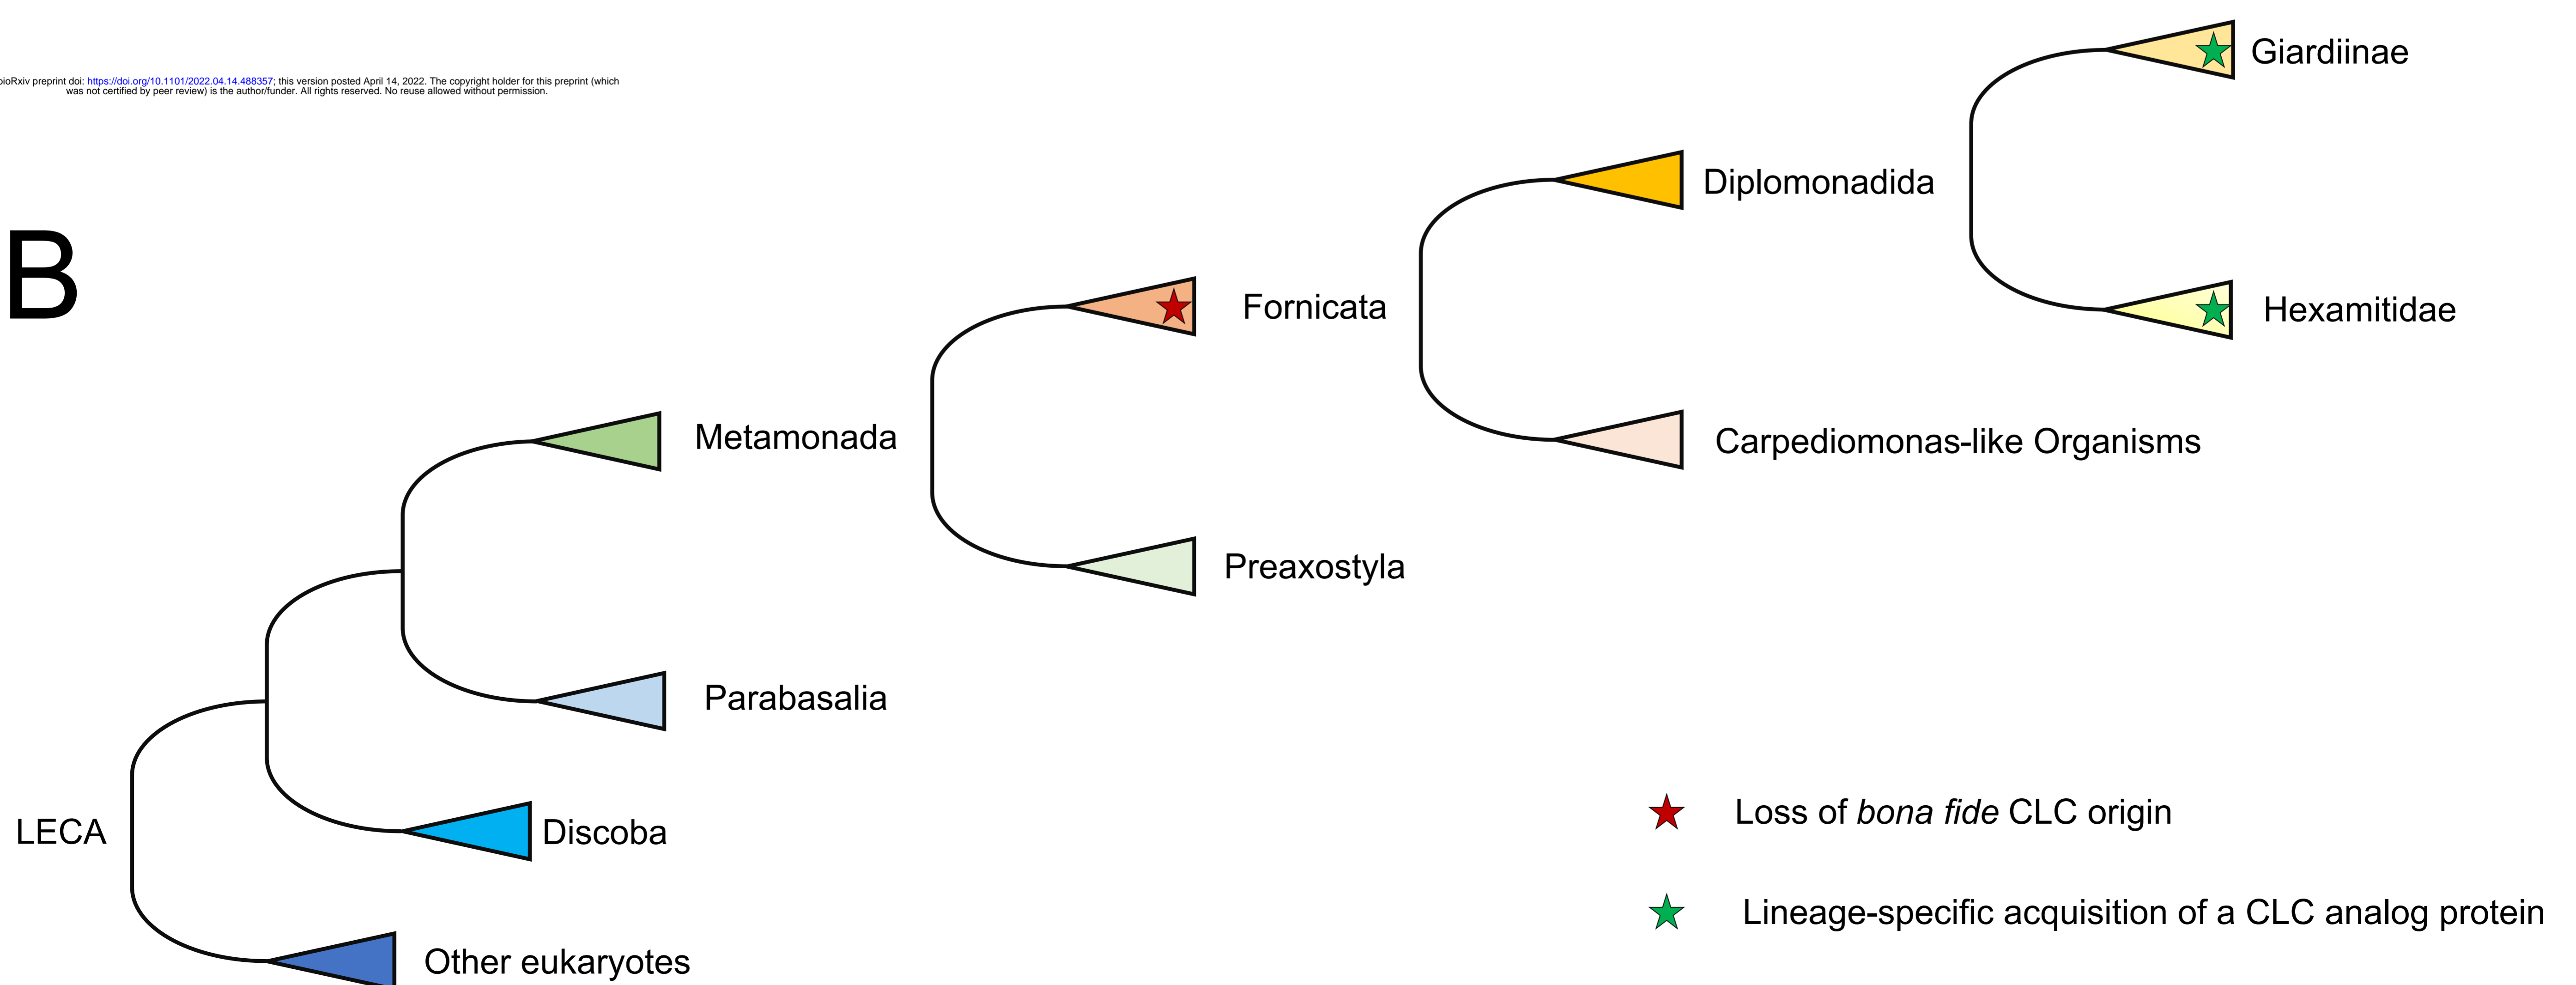

Source: https://www.biorxiv.org/content/10.1101/2022.04.14.488357v1.full.pdf
